# Supplementary material for: Asymmetric construction of polycyclic indole derivatives with different ring connectivities by an organocatalysis triggered two-step sequence
Source: Royal Society of Chemistry journal article supplement (doi:10.1039/c8qo01406j), 2019-01-01

**Asymmetric Construction of Polycyclic Indole derivatives  
with Different Ring Connectivity by Organocatalysis  
Triggered Two-step Sequence**

Chao-Chao Xie,<sup>a</sup> Rui Tan,<sup>b</sup> and Yan-Kai Liu<sup>\*,a,c</sup>

<sup>a</sup>Key Laboratory of Marine Drugs, Chinese Ministry of Education, School of Medicine and Pharmacy, Ocean University of China, Qingdao 266003, China.

<sup>b</sup>School of Life Science and Engineering, Southwest Jiaotong University, Chengdu, Sichuan 610031, China

<sup>c</sup>Laboratory for Marine Drugs and Bioproducts of Qingdao National Laboratory for Marine Science and Technology, Qingdao 266003, China.

Email: liuyankai@ouc.edu.cn

**Supporting Information**

## Contents

|                                                                                                                |    |
|----------------------------------------------------------------------------------------------------------------|----|
| A. General information .....                                                                                   | 3  |
| B. The synthesis of the substrate <b>1</b> .....                                                               | 5  |
| C. Optimization of the reaction conditions.....                                                                | 6  |
| C1. Optimization of the Michael Addition.....                                                                  | 6  |
| C2. Optimization of the second step .....                                                                      | 8  |
| D. Scope of the reaction .....                                                                                 | 9  |
| D1. Synthesis of product <b>5a</b> .....                                                                       | 9  |
| D2. Synthesis of Polycyclic Indoles via C3-Alkylation Path.....                                                | 19 |
| D3. Optimization of the reaction conditions .....                                                              | 22 |
| D4. Synthesis of Polycyclic Indoles via C2-Alkylation Path.....                                                | 23 |
| E. Synthetic transformations .....                                                                             | 26 |
| E1. Modification of C3 position of Indole Moiety in <b>4</b> .....                                             | 26 |
| E2. Modification of C3 position of Indole Moiety in <b>5a</b> .....                                            | 29 |
| E3. Useful Transformations of Product <b>5a</b> .....                                                          | 32 |
| E4. Synthesis of Spiro-fused 2-Azido Indoline <b>17</b> via Radical-mediated<br>dearomatization reaction ..... | 35 |
| F. NMR spectra and HPLC traces .....                                                                           | 37 |
| G. Single crystal X-Ray diffraction data.....                                                                  | 85 |
| H. Absolute configuration of <b>15b</b> .....                                                                  | 87 |
| I. Absolute configuration of <b>17</b> .....                                                                   | 90 |

## A. General information

The  $^1\text{H}$  and  $^{13}\text{C}$  NMR spectra were recorded at 500 MHz for  $^1\text{H}$  and at 125 MHz for  $^{13}\text{C}$ . The chemical shifts ( $\delta$ ) for  $^1\text{H}$  and  $^{13}\text{C}$  are given in ppm relative to residual signals of the solvents ( $\text{CDCl}_3$  at 7.26 ppm  $^1\text{H}$  NMR, 77.16 ppm  $^{13}\text{C}$  NMR.). Coupling constants are given in Hz. The following abbreviations are used to indicate the multiplicity: s, singlet; d, doublet; t, triplet; q, quartet; m, multiplet. High-resolution mass spectra (HRMS) were obtained from the Waters Q-ToF Ultima Global. X-ray data were obtained from Zhongke chemical technology service center. Optical rotations are reported as follows:  $[\alpha]_D^{20}$  (c in g per 100 mL, solvent:  $\text{CHCl}_3$ ).

Note: NMR signals containing common solvent contaminants were list.  $\text{H}_2\text{O}$  in  $\text{CDCl}_3$  at 1.56 ppm  $^1\text{H}$  NMR; ethyl acetate in  $\text{CDCl}_3$  at 2.05 (s), 4.12 (q), 1.26 (t) ppm  $^1\text{H}$  NMR; dichloromethane in  $\text{CDCl}_3$  at 5.30 (s) ppm  $^1\text{H}$  NMR; acetone in  $\text{CDCl}_3$  at 2.17 (s) ppm  $^1\text{H}$  NMR; diethyl ether in  $\text{CDCl}_3$  at 1.21 (t), 3.48 (q), ppm  $^1\text{H}$  NMR

All the reactions were set up under air and using freshly distilled solvents, without any precautions to exclude moisture, unless otherwise noted open air chemistry on the bench-top. Chromatographic purification of products was accomplished using force-flow chromatography (FC) on silica gel (300-400 mesh). For thin layer chromatography (TLC) analysis throughout this work, Merck pre-coated TLC plates (silica gel 60 GF254, 0.25 mm) were used, using UV light as the visualizing agent and an phosphomolybdic acid or basic aqueous potassium permanganate ( $\text{KMnO}_4$ ) as stain developing solutions. Organic solutions were concentrated under reduced pressure on a Büchi rotary evaporator.

HPLC analyses on chiral stationary phase were performed on an Hitachi Chromaste. Daicel Chiralpak IA, IB, or IC columns with *n*-hexane/*i*-PrOH as the eluent were used. HPLC traces were compared to racemic samples which prepared by mixture of two enantiomeric final products obtained using (*S*) and (*R*) catalyst.

Commercial reagents and solvents were purchased from Sigma Aldrich, Fluka, and Alfa Aesar used as received, without further purification. (*E*)-2-(2-nitrovinyl)-1*H*-indoles (**2a**) were prepared from 1*H*-indole-2-carbaldehydes<sup>1</sup>. The *tert*-butyl (*E*)-3-(2-nitrovinyl)-1*H*-indole-1-carboxylate were prepared from *tert*-butyl 3-formyl-1*H*-indole-1-carboxylate<sup>2</sup>.

1. Enders, D.; Wang, C.; Yang, X.; Raabe, G., One-pot organocatalytic asymmetric synthesis of 1*H*-pyrrolo[1,2*a*]indol-3(2*H*)-ones via a Michael-hemiaminalization-oxidation sequence. *Synlett* **2011**, (4), 469-472.
2. Feng, H.-X.; Tan, R.; Liu, Y.-K., An Efficient One-Pot Approach to the Construction of Chiral Nitrogen-Containing Heterocycles under Mild Conditions. *Org. Lett.* **2015**, *17* (15), 3794-3797.



## B. The synthesis of the substrate **1**

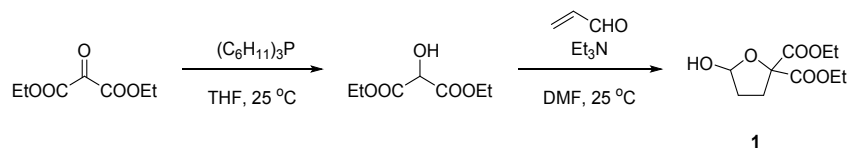

**General procedure:** A glass vial equipped with a magnetic stirring bar was charged with diethyl ketomalonate (8.0 mmol, 1.0 equiv) and tricyclohexyl phosphine (12.0 mmol, 1.5 equiv) in THF (15.0 mL, THF = tetrahydrofuran) at 25 °C . After the reaction was completed, solvent was removed under reduced pressure and the crude product was purified by column chromatography on silica gel to provide the product diethyl 2-hydroxymalonate. Then the product diethyl 2-hydroxymalonate (8.0 mmol, 1.0 equiv) and acrolein (12.0 mmol, 1.5 equiv) were respectively dissolved in DMF (12.0 ml, DMF = N,N-dimethylformamide.) at 25 °C, and then Et<sub>3</sub>N (0.16 mmol, 0.2 equiv, Et<sub>3</sub>N = triethylamine) was added to the reaction mixtures at the same temperature. After the reaction was completed, water was added and the aqueous layer was extracted with ethyl acetate twice. The combined organic extracts were washed with brine, dried by Na<sub>2</sub>SO<sub>4</sub>, filtered, and concentrated in vacuo. The crude product was purified by column chromatography on silica gel to provide the desired product **1** (1.04 g, 56% in 2 steps).

## C. Optimization of the reaction conditions

### C1. Optimization of the Michael Addition

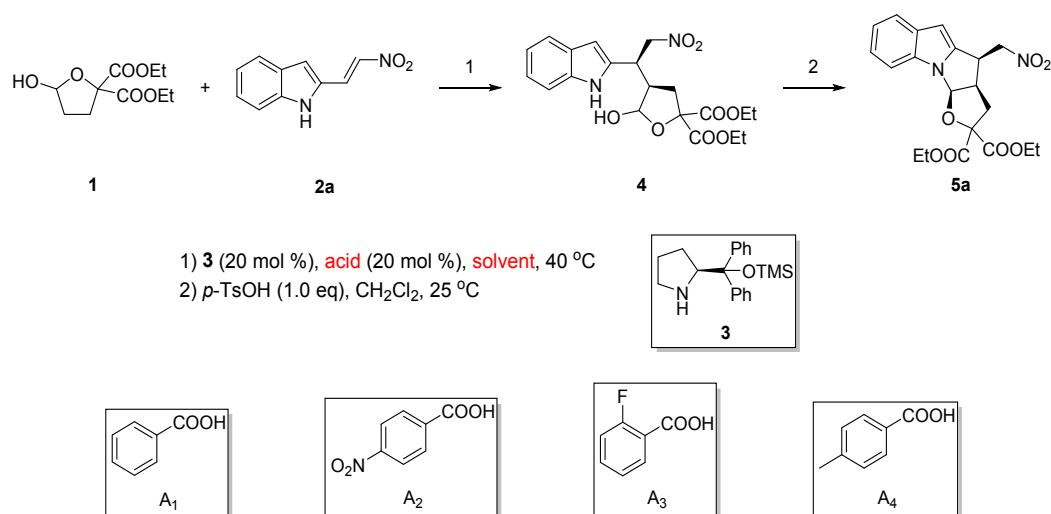

**Table S1.** Optimization of the Michael Addition<sup>a</sup>

| Entry | Solvent           | Acid           | t (h) <sup>b</sup> | Yield (%) <sup>c</sup> | ee (%) <sup>d</sup> | dr <sup>e</sup> |
|-------|-------------------|----------------|--------------------|------------------------|---------------------|-----------------|
| 1     | MeOH              | A <sub>1</sub> | 20                 | 28                     | >99                 | >20:1           |
| 2     | MeCN              | A <sub>1</sub> | 12                 | 42                     | >99                 | >18:1           |
| 3     | tetrahydrofuran   | A <sub>1</sub> | 12                 | 50                     | >99                 | >20:1           |
| 4     | CHCl <sub>3</sub> | A <sub>1</sub> | 16                 | 49                     | >99                 | >18:1           |
| 5     | toluene           | A <sub>1</sub> | 10                 | 70                     | >99                 | >20:1           |
| 6     | toluene           | A <sub>2</sub> | 14                 | 62                     | >99                 | >20:1           |
| 7     | toluene           | A <sub>3</sub> | 14                 | 54                     | >99                 | >20:1           |
| 8     | toluene           | A <sub>4</sub> | 16                 | 49                     | >99                 | >20:1           |

[a] Unless otherwise specified, all reactions were carried out using **1** (0.20 mmol, 1.0 equiv), **2a** (0.24 mmol, 1.2 equiv) in solvent (0.6 mL) with **3** (20 mol%) and **acid** (20 mol%) at 40 °C. After workup, the mixture was purified by flash chromatography on silica gel to afford **4**. Compound **4** were respectively dissolved in redistilled CH<sub>2</sub>Cl<sub>2</sub> (0.10 mmol in 1 mL) at 25 °C. *p*-TsOH (1.0 eq) was added, After full conversion of the second step, the residue was purified by flash chromatography on gel to give product **5a**. [b] For the first step. [c] Isolated yield of **5a** over two steps. [d] Determined by HPLC analyses of isolated compound **5a** on chiral stationary phases. [e] Determined by <sup>1</sup>H NMR. MeOH = methanol; MeCN = acetonitrile; CHCl<sub>3</sub> = chloroform; *p*-TsOH = *p*-Toluenesulfonic acid.

## Optimization of the catalyst

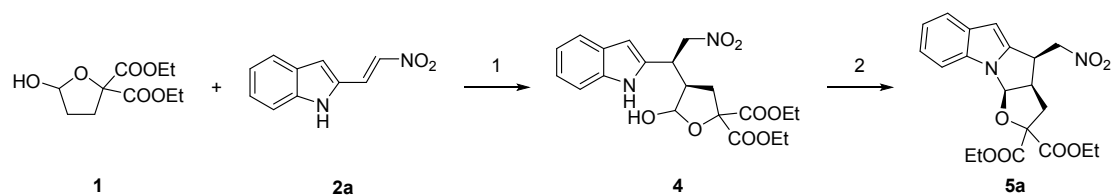

1) **cat.** (20 mol %), **A<sub>1</sub>** (20 mol %), toluene, 40 °C  
 2) *p*-TsOH (1.0 eq), CH<sub>2</sub>Cl<sub>2</sub>, 25 °C

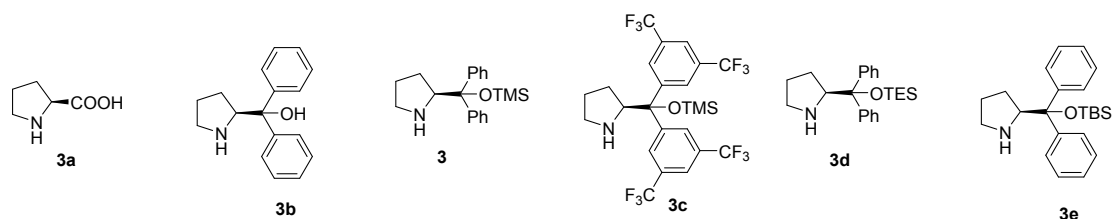

**Table S2.** Optimization of the catalyst <sup>a</sup>

| Entry | Catalyst | <b>Aci</b><br><b>d</b> | <b>t (h)<sup>b</sup></b> | <b>Yield (%)<sup>c</sup></b> | <b>ee (%)<sup>d</sup></b> | <b>dr<sup>e</sup></b> |
|-------|----------|------------------------|--------------------------|------------------------------|---------------------------|-----------------------|
| 1     | 3a       | A <sub>1</sub>         | 24                       | 32                           | -18                       | >20:1                 |
| 2     | 3b       | A <sub>1</sub>         | 12                       | 51                           | 92                        | >20:1                 |
| 3     | 3        | A <sub>1</sub>         | 10                       | 71                           | >99                       | >20:1                 |
| 4     | 3c       | A <sub>1</sub>         | 32                       | 49                           | 95                        | >20:1                 |
| 5     | 3d       | A <sub>1</sub>         | 14                       | 62                           | >99                       | >20:1                 |
| 6     | 3e       | A <sub>1</sub>         | 16                       | 58                           | 99                        | >20:1                 |

[a] Unless otherwise specified, all reactions were carried out using **1** (0.20 mmol, 1.0 equiv), **2a** (0.24 mmol, 1.2 equiv) in solvent (0.6 mL) with **cat.** (20 mol%) and **acid** (20 mol%) at 40 °C. After workup, the mixture was purified by flash chromatography on silica gel to afford **4**. Compound **4** were respectively dissolved in redistilled CH<sub>2</sub>Cl<sub>2</sub> (0.10 mmol in 1 mL) at 25 °C. *p*-TsOH (1.0 eq) was added, After full conversion of the second step, the residue was purified by flash chromatography on gel to give product **5a**. [b] For the first step. [c] Isolated yield of **5a** over two steps. [d] Determined by HPLC analyses of isolated compound **5a** on chiral stationary phases. TMS = trimethylsilyl; TES = triethylsilyl, TBS = *tert*-butyldimethylsilyl.

## C2. Optimization of the second step

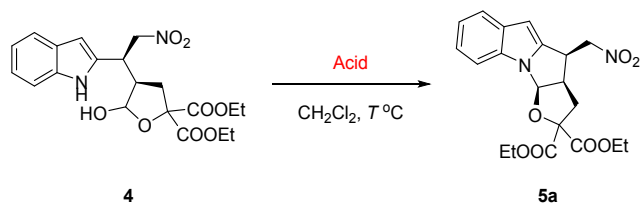

**Table S3. Optimization of the second step<sup>a</sup>**

| Entry | Acid                                        | Tem (°C) | t (h) | Yield (%) <sup>b</sup> | ee (%) <sup>c</sup> |
|-------|---------------------------------------------|----------|-------|------------------------|---------------------|
| 1     | BF <sub>3</sub> ·Et <sub>2</sub> O (1.0 eq) | 0        | 4     | 60                     | >99                 |
| 2     | trifluoroacetic acid (1.0 eq)               | 0        | 3     | 43                     | >99                 |
| 3     | triphenylphosphate (1.0 eq)                 | 25       | 12    | 40                     | >99                 |
| 4     | methanesulfonic acid (1.0 eq)               | 25       | 0.5   | 29                     | >99                 |
| 5     | <i>p</i> -TsOH (1.0 eq)                     | 0        | 24    | 64                     | >99                 |
| 6     | <i>p</i> -TsOH (0.4 eq)                     | 25       | 12    | 65                     | >99                 |
| 7     | <i>p</i> -TsOH (0.8 eq)                     | 25       | 6     | 69                     | >99                 |
| 8     | <i>p</i> -TsOH (1.0 eq)                     | 25       | 2     | 76                     | >99                 |

[a] Unless otherwise specified, all reactions were carried out using **4** (0.05 mmol, 1.0 equiv) in redistilled CH<sub>2</sub>Cl<sub>2</sub> (1.0 mL) with **acid** at corresponding temperature. After workup, the mixture was purified by flash chromatography on silica gel to afford **5a**. [b] Isolated yield of **5a**. [c] Determined by HPLC analyses of isolated compound **5a** on chiral stationary phases. BF<sub>3</sub>·Et<sub>2</sub>O = boron trifluoride etherate

## D. Scope of the reaction

### D1. Synthesis of product 5a

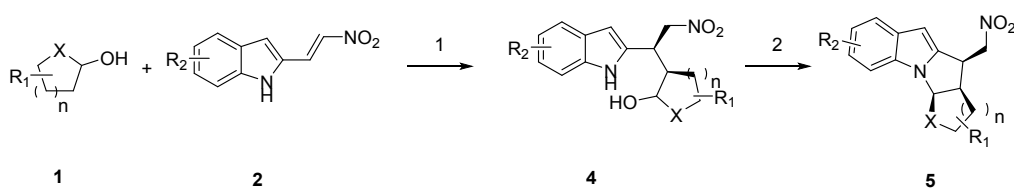

1) **3** (20 mol %), BA (20 mol %), toluene, 40 °C  
2) *p*-TsOH (1.0 eq), CH<sub>2</sub>Cl<sub>2</sub>, 25 °C

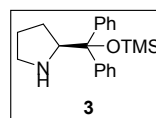

**General procedure:** A glass vial equipped with a magnetic stirring bar was charged with lactols **1** (0.20 mmol, 1.0 equiv), (*E*)-2-(2-nitrovinyl)-1*H*-indole **2** (0.24 mmol, 1.2 equiv), **3** (0.04 mmol, 0.2 equiv TMS = trimethylsilyl) and BA (0.04 mmol, 0.2 equiv BA = benzoic acid) in toluene (0.6 mL) at 40 °C. The resulting reaction mixture was kept under vigorous stirring until the consumption of lactols **1** (monitored by TLC analysis). After completion of the reaction, the reaction mixture was concentrated and the residue was purified by flash chromatography on silica gel (petroleum ether/ethyl acetate = 3:1) to afford **4**. Then, compound **4** (1.0 equiv) were respectively dissolved in anhydrous CH<sub>2</sub>Cl<sub>2</sub> (0.10 mmol in 1.0 mL) at 25 °C, and *p*-TsOH (1.0 equiv) was added to the reaction mixtures. After full conversion of the second step, the reaction mixture was concentrated and the residue was purified by flash chromatography on silica gel (petroleum ether/ethyl acetate = 9:1 to 7:1) to give product **5**.

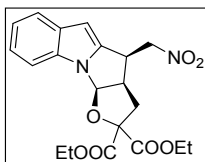

diethyl (3aR,4R,10aR)-4-(nitromethyl)-3a,10a-dihydro-4H-furo[3',2':4,5]pyrrolo[1,2-a]indole-2,2(3H)-dicarboxylate (**5a**)

**5a** was obtained as a colorless oil 56.3 mg in 70% yield for two steps after column chromatography on silica gel (petroleum ether/ethyl acetate = 10/1).  $^1\text{H NMR}$  (500 MHz,  $\text{CDCl}_3$ )  $\delta$  7.58 – 7.54 (m, 1H), 7.51 – 7.47 (m, 1H), 7.19 – 7.13 (m, 1H), 7.12 – 7.07 (m, 1H), 6.59 (d,  $J = 5.6$  Hz, 1H), 6.09 – 6.06 (m, 1H), 5.11 (dd,  $J = 14.5, 10.0$  Hz, 1H), 5.03 (dd,  $J = 14.5, 5.5$  Hz, 1H), 4.30 (dq,  $J = 10.8, 7.1$  Hz, 1H), 4.26 – 4.18 (m, 2H), 3.93 (dddd,  $J = 11.0, 5.3, 4.8, 2.5$  Hz, 1H), 3.58 – 3.51 (m, 1H), 2.97 – 2.91 (m, 1H), 2.88 (dd,  $J = 14.1, 4.2$  Hz, 1H), 2.35 (dd,  $J = 14.1, 11.2$  Hz, 1H), 1.28 – 1.25 (m, 3H), 0.67 (t,  $J = 7.2$  Hz, 3H) ppm.  $^{13}\text{C NMR}$  (125 MHz,  $\text{CDCl}_3$ )  $\delta$  168.0, 167.7, 139.4, 133.5, 132.0, 122.1, 121.0, 120.9, 111.3, 94.5, 92.0, 87.7, 74.1, 62.8, 62.4, 48.8, 36.8, 32.8, 14.2, 13.2 ppm. **HRMS**:  $[\text{M}+\text{H}]^+$  *calcd.* For  $\text{C}_{20}\text{H}_{23}\text{N}_2\text{O}_7^+$  403.1500 found 403.1503.  $[\alpha]_{\text{D}}^{20}$  -53.19 ( $c = 1.28$  in  $\text{CHCl}_3$ ). The enantiomeric excess was determined by HPLC analysis on Daicel Chiralpak IB column [*n*-hexane/*i*-PrOH = 80/20, 1 mL/min],  $\lambda = 220$  nm,  $t_{\text{major}} = 31.84$  min,  $t_{\text{minor}} = 26.49$  min, **ee >99%**. The diastereomeric ratio was determined by  $^1\text{H NMR}$  **dr >20:1**.

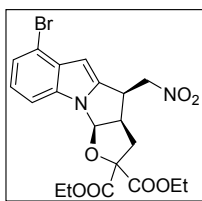

diethyl (3aR,4R,10aR)-6-bromo-4-(nitromethyl)-3a,10a-dihydro-4H-furo[3',2':4,5]pyrrolo[1,2-a]indole-2,2(3H)-dicarboxylate (**5b**)

**5b** was obtained as a colorless oil 49.1 mg in 51% yield for two steps after column chromatography on silica gel (petroleum ether/ethyl acetate = 11/1).  $^1\text{H NMR}$  (500 MHz,  $\text{CDCl}_3$ )  $\delta$  7.50 (d,  $J = 8.1$  Hz, 1H), 7.27 (d,  $J = 7.7$  Hz, 1H), 7.03 (t,  $J = 7.9$  Hz, 1H), 6.53 (d,  $J = 5.6$  Hz, 1H), 6.16 (s, 1H), 5.06 (qd,  $J = 14.6, 7.7$  Hz, 2H), 4.34 – 4.16 (m, 3H), 3.99 – 3.88 (m, 1H), 3.58 (dq,  $J = 10.7, 7.1$  Hz, 1H), 3.06 (dq,  $J = 10.7, 7.2$  Hz, 1H), 2.83 (dd,  $J = 14.1, 4.4$  Hz, 1H), 2.37 (dd,  $J = 14.1, 11.0$  Hz, 1H), 1.26 (t,  $J = 7.1$  Hz, 3H), 0.69 (t,  $J = 7.1$  Hz, 3H) ppm.  $^{13}\text{C NMR}$  (125 MHz,  $\text{CDCl}_3$ )  $\delta$  167.7, 167.4, 139.9, 133.7, 132.1, 123.7, 122.8, 114.1, 110.3, 94.8,

92.1, 87.6, 73.6, 62.7, 62.3, 48.5, 36.7, 32.6, 14.0, 13.1 ppm. **HRMS**:  $[M+H]^+$  *calcd.* For  $C_{20}H_{22}BrN_2O_7^+$  481.0605 found 481.0610.  $[\alpha]_D^{20}$  -39.65 ( $c = 2.04$  in  $CHCl_3$ ). The enantiomeric excess was determined by HPLC analysis on Daicel Chiralpak IB column [*n*-hexane/*i*-PrOH = 70/30, 1 mL/min],  $\lambda = 220$  nm,  $t_{major} = 22.41$  min,  $t_{minor} = 39.19$  min, **ee** >99%. The diastereomeric ratio was determined by  $^1H$  NMR **dr** >20:1.

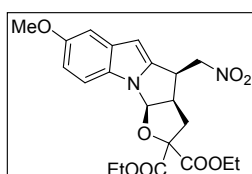

diethyl (3aR,4S,10aR)-7-methoxy-4-(nitromethyl)-3a,10a-dihydro-4H-furo[3',2':4,5]pyrrolo[1,2-a]indole-2,2(3H)-dicarboxylate (**5c**)

**5c** was obtained as a colorless oil 50.2 mg in 58% yield for two steps after column chromatography on silica gel (petroleum ether/ethyl acetate = 11/1).  $^1H$  NMR (500 MHz,  $CDCl_3$ )  $\delta$  7.45 (d,  $J = 8.8$  Hz, 1H), 6.97 (d,  $J = 2.3$  Hz, 1H), 6.83 (dd,  $J = 8.8, 2.3$  Hz, 1H), 6.56 (d,  $J = 5.6$  Hz, 1H), 6.01 (s, 1H), 5.06 (ddd,  $J = 20.0, 14.5, 7.7$  Hz, 2H), 4.37 – 4.14 (m, 3H), 4.00 – 3.90 (m, 1H), 3.82 (s, 3H), 3.59 (dq,  $J = 10.7, 7.1$  Hz, 1H), 3.04 (dq,  $J = 10.7, 7.2$  Hz, 1H), 2.88 (dd,  $J = 14.1, 4.1$  Hz, 1H), 2.35 (dd,  $J = 14.1, 11.2$  Hz, 1H), 1.27 (t,  $J = 7.1$  Hz, 3H), 0.74 (t,  $J = 7.1$  Hz, 3H) ppm.  $^{13}C$  NMR (125 MHz,  $CDCl_3$ )  $\delta$  167.8, 167.6, 154.9, 139.9, 134.0, 127.0, 111.8, 111.8, 102.9, 94.1, 92.0, 87.5, 73.9, 62.6, 62.2, 55.8, 48.5, 36.8, 32.6, 14.0, 13.2 ppm. **HRMS**:  $[M+H]^+$  *calcd.* For  $C_{21}H_{25}N_2O_8^+$  433.1605 found 433.1600.  $[\alpha]_D^{20}$  -32.58 ( $c = 0.83$  in  $CHCl_3$ ). The enantiomeric excess was determined by HPLC analysis on Daicel Chiralpak IB column [*n*-hexane/*i*-PrOH = 70/30, 1 mL/min],  $\lambda = 220$  nm,  $t_{major} = 23.73$  min,  $t_{minor} = 14.11$  min, **ee** >99%. The diastereomeric ratio was determined by  $^1H$  NMR **dr** >20:1.

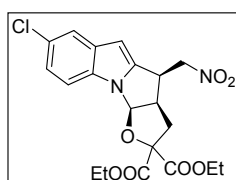

diethyl (3aR,4R,10aR)-7-chloro-4-(nitromethyl)-3a,10a-dihydro-4H-furo[3',2':4,5]pyrrolo[1,2-a]indole-2,2(3H)-dicarboxylate (**5d**)

**5d** was obtained as a colorless oil 53.3 mg in 61% yield for two steps after column chromatography on silica gel (petroleum ether/ethyl acetate = 13/1).  $^1H$  NMR (500 MHz,

CDCl<sub>3</sub>)  $\delta$  7.46 (t,  $J$  = 5.8 Hz, 2H), 7.12 (dd,  $J$  = 8.6, 2.0 Hz, 1H), 6.56 (d,  $J$  = 5.7 Hz, 1H), 6.02 (s, 1H), 5.04 (ddd,  $J$  = 20.2, 14.5, 7.7 Hz, 2H), 4.38 – 4.14 (m, 3H), 4.00 – 3.88 (m, 1H), 3.58 (dq,  $J$  = 10.7, 7.1 Hz, 1H), 3.05 (dq,  $J$  = 10.7, 7.2 Hz, 1H), 2.84 (dd,  $J$  = 14.1, 4.2 Hz, 1H), 2.36 (dd,  $J$  = 14.1, 11.1 Hz, 1H), 1.26 (t,  $J$  = 7.1 Hz, 3H), 0.72 (t,  $J$  = 7.1 Hz, 3H) ppm. <sup>13</sup>C NMR (125 MHz, CDCl<sub>3</sub>)  $\delta$  167.7, 167.4, 140.8, 134.3, 130.2, 126.6, 122.2, 120.2, 112.1, 94.1, 91.9, 87.6, 73.7, 62.7, 62.3, 48.6, 36.7, 32.5, 14.0, 13.1 ppm. HRMS: [M+H]<sup>+</sup> *calcd.* For C<sub>20</sub>H<sub>22</sub>ClN<sub>2</sub>O<sub>7</sub><sup>+</sup> 437.1110 found 437.1112. [ $\alpha$ ]<sub>D</sub><sup>20</sup> -57.38 ( $c$  = 0.68 in CHCl<sub>3</sub>). The enantiomeric excess was determined by HPLC analysis on Daicel Chiralpak IB column [*n*-hexane/*i*-PrOH = 80/20, 1 mL/min],  $\lambda$  = 220 nm,  $t_{major}$  = 37.08 min,  $t_{minor}$  = 17.11 min, **ee** >99%. The diastereomeric ratio was determined by <sup>1</sup>H NMR **dr** >20:1.

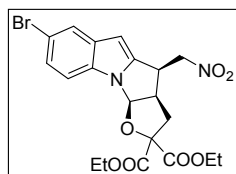

diethyl (3*aR*,4*R*,10*aR*)-7-bromo-4-(nitromethyl)-3*a*,10*a*-dihydro-4*H*-furo[3',2':4,5]pyrrolo[1,2-*a*]indole-2,2(3*H*)-dicarboxylate (**5e**)

**5e** was obtained as a colorless oil 54.8 mg in 57% yield for two steps after column chromatography on silica gel (petroleum ether/ethyl acetate = 13/1). <sup>1</sup>H NMR (500 MHz, CDCl<sub>3</sub>)  $\delta$  7.50 (d,  $J$  = 8.1 Hz, 1H), 7.27 (d,  $J$  = 7.7 Hz, 1H), 7.03 (t,  $J$  = 7.9 Hz, 1H), 6.53 (d,  $J$  = 5.6 Hz, 1H), 6.16 (s, 1H), 5.06 (qd,  $J$  = 14.6, 7.7 Hz, 2H), 4.34 – 4.16 (m, 3H), 3.99 – 3.88 (m, 1H), 3.58 (dq,  $J$  = 10.7, 7.1 Hz, 1H), 3.06 (dq,  $J$  = 10.7, 7.2 Hz, 1H), 2.83 (dd,  $J$  = 14.1, 4.4 Hz, 1H), 2.37 (dd,  $J$  = 14.1, 11.0 Hz, 1H), 1.26 (t,  $J$  = 7.1 Hz, 3H), 0.69 (t,  $J$  = 7.1 Hz, 3H) ppm. <sup>13</sup>C NMR (125 MHz, CDCl<sub>3</sub>)  $\delta$  167.7, 167.4, 140.6, 134.9, 130.5, 124.6, 123.3, 114.2, 112.5, 94.0, 91.9, 87.6, 73.7, 62.7, 62.3, 48.6, 36.7, 32.5, 14.0, 13.1 ppm. HRMS: [M+H]<sup>+</sup> *calcd.* For C<sub>20</sub>H<sub>22</sub>BrN<sub>2</sub>O<sub>7</sub><sup>+</sup> 481.0605 found 481.0604. [ $\alpha$ ]<sub>D</sub><sup>20</sup> -73.38 ( $c$  = 1.22 in CHCl<sub>3</sub>). The enantiomeric excess was determined by HPLC analysis on Daicel Chiralpak IB column [*n*-hexane/*i*-PrOH = 70/30, 1 mL/min],  $\lambda$  = 220 nm,  $t_{major}$  = 24.03 min,  $t_{minor}$  = 12.66 min, **ee** = 99%. The diastereomeric ratio was determined by <sup>1</sup>H NMR **dr** >20:1.



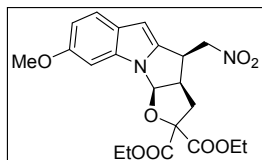

diethyl (3aR,4R,10aR)-8-methoxy-4-(nitromethyl)-3a,10a-dihydro-4H-furo[3',2':4,5]pyrrolo[1,2-a]indole-2,2(3H)-dicarboxylate (**5f**)

**5f** was obtained as a colorless oil 51.9 mg in 61% yield for two steps after column chromatography on silica gel (petroleum ether/ethyl acetate = 8/1).  $^1\text{H NMR}$  (500 MHz,  $\text{CDCl}_3$ )  $\delta$  7.36 (d,  $J$  = 8.7 Hz, 1H), 7.05 (d,  $J$  = 2.1 Hz, 1H), 6.77 (dd,  $J$  = 8.7, 2.3 Hz, 1H), 6.56 (d,  $J$  = 5.6 Hz, 1H), 6.02 (s, 1H), 5.05 (ddd,  $J$  = 19.9, 14.5, 7.7 Hz, 2H), 4.36 – 4.16 (m, 3H), 3.97 – 3.90 (m, 1H), 3.86 (s, 3H), 3.62 (dq,  $J$  = 10.7, 7.1 Hz, 1H), 3.05 (dq,  $J$  = 10.7, 7.2 Hz, 1H), 2.89 (dd,  $J$  = 14.1, 4.4 Hz, 1H), 2.36 (dd,  $J$  = 14.0, 11.1 Hz, 1H), 1.28 (t,  $J$  = 7.1 Hz, 3H), 0.75 (t,  $J$  = 7.1 Hz, 3H) ppm.  $^{13}\text{C NMR}$  (125 MHz,  $\text{CDCl}_3$ )  $\delta$  167.7, 156.2, 137.8, 132.5, 127.3, 121.4, 111.1, 94.4, 94.3, 91.8, 87.5, 74.0, 62.6, 62.2, 55.8, 48.7, 36.6, 32.6, 14.0, 13.1 ppm. **HRMS**:  $[\text{M}+\text{H}]^+$  *calcd.* For  $\text{C}_{21}\text{H}_{25}\text{N}_2\text{O}_8^+$  433.1605 found 433.1601.  $[\alpha]_{\text{D}}^{20}$  -48.63 ( $c$  = 2.23 in  $\text{CHCl}_3$ ). The enantiomeric excess was determined by HPLC analysis on Daicel Chiralpak IB column [ $n$ -hexane/ $i$ -PrOH = 70/30, 1 mL/min],  $\lambda$  = 220 nm,  $t_{\text{major}}$  = 29.87 min,  $t_{\text{minor}}$  = 12.15 min, **ee** >99%. The diastereomeric ratio was determined by  $^1\text{H NMR}$  **dr** >20:1.

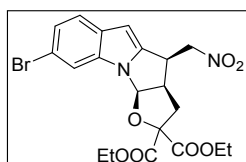

diethyl (3aR,4R,10aR)-8-bromo-4-(nitromethyl)-3a,10a-dihydro-4H-furo[3',2':4,5]pyrrolo[1,2-a]indole-2,2(3H)-dicarboxylate (**5g**)

**5g** was obtained as a colorless oil 49.1 mg in 51% yield for two steps after column chromatography on silica gel (petroleum ether/ethyl acetate = 12/1).  $^1\text{H NMR}$  (500 MHz,  $\text{CDCl}_3$ )  $\delta$  7.73 (s, 1H), 7.34 (d,  $J$  = 8.5 Hz, 1H), 7.20 (dd,  $J$  = 8.5, 1.7 Hz, 1H), 6.55 (d,  $J$  = 5.6 Hz, 1H), 6.06 (s, 1H), 5.04 (qd,  $J$  = 14.5, 7.7 Hz, 2H), 4.36 – 4.15 (m, 3H), 3.99 – 3.87 (m, 1H), 3.58 (dq,  $J$  = 10.7, 7.1 Hz, 1H), 2.99 (dq,  $J$  = 10.6, 7.2 Hz, 1H), 2.85 (dd,  $J$  = 14.1, 4.3 Hz, 1H), 2.36 (dd,  $J$  = 14.1, 11.2 Hz, 1H), 1.27 (t,  $J$  = 7.1 Hz, 3H), 0.76 (t,  $J$  = 7.2 Hz, 3H) ppm.  $^{13}\text{C NMR}$  (125 MHz,  $\text{CDCl}_3$ )  $\delta$  167.7, 167.4, 140.0, 132.4, 132.1, 124.1, 122.0, 115.3, 114.1, 94.6, 91.8, 87.6, 73.8, 62.7, 62.4, 48.6, 36.6, 32.4, 14.0, 13.1 ppm. **HRMS**:  $[\text{M}+\text{H}]^+$  *calcd.* For  $\text{C}_{20}\text{H}_{22}\text{BrN}_2\text{O}_7^+$  481.0605 found 481.0606.  $[\alpha]_{\text{D}}^{20}$  -68.72 ( $c$  = 1.82 in  $\text{CHCl}_3$ ). The

enantiomeric excess was determined by HPLC analysis on Daicel Chiralpak IB column [*n*-hexane/*i*-PrOH = 70/30, 1 mL/min],  $\lambda = 220$  nm,  $t_{major} = 35.60$  min,  $t_{minor} = 11.45$  min, **ee** >99%. The diastereomeric ratio was determined by  $^1\text{H NMR}$  **dr** >20:1.

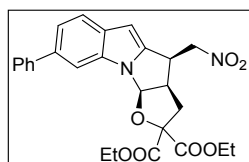

diethyl (3aR,4R,10aR)-4-(nitromethyl)-8-phenyl-3a,10a-dihydro-4H-furo[3',2':4,5]pyrrolo[1,2-a]indole-2,2(3H)-dicarboxylate (**5h**)

**5h** was obtained as a colorless oil 49.9 mg in 53% yield for two steps after column chromatography on silica gel (petroleum ether/ethyl acetate = 8/1).  $^1\text{H NMR}$  (500 MHz,  $\text{CDCl}_3$ )  $\delta$  7.79 (s, 1H), 7.67 – 7.63 (m, 2H), 7.54 (d,  $J = 8.3$  Hz, 1H), 7.44 (t,  $J = 7.7$  Hz, 2H), 7.39 (dd,  $J = 8.3, 1.5$  Hz, 1H), 7.33 (t,  $J = 7.4$  Hz, 1H), 6.64 (d,  $J = 5.6$  Hz, 1H), 6.10 (s, 1H), 5.09 (ddd,  $J = 20.0, 14.5, 7.7$  Hz, 2H), 4.38 – 4.17 (m, 3H), 4.00 – 3.91 (m, 1H), 3.54 (dq,  $J = 10.7, 7.1$  Hz, 1H), 3.01 – 2.83 (m, 2H), 2.36 (dd,  $J = 14.1, 11.3$  Hz, 1H), 1.26 (t,  $J = 7.1$  Hz, 3H), 0.61 (t,  $J = 7.1$  Hz, 3H) ppm.  $^{13}\text{C NMR}$  (125 MHz,  $\text{CDCl}_3$ )  $\delta$  167.8, 167.6, 141.8, 140.0, 135.4, 132.6, 132.4, 128.7, 127.3, 126.8, 121.0, 120.5, 109.6, 94.3, 91.9, 87.5, 73.9, 62.6, 62.2, 48.6, 36.7, 32.6, 14.0, 13.0 ppm. **HRMS**:  $[\text{M}+\text{H}]^+$  *calcd.* For  $\text{C}_{26}\text{H}_{27}\text{N}_2\text{O}_7^+$  479.1813 found 479.1810.  $[\alpha]_{\text{D}}^{20}$  -64.67 ( $c = 0.48$  in  $\text{CHCl}_3$ ). The enantiomeric excess was determined by HPLC analysis on Daicel Chiralpak IB column [*n*-hexane/*i*-PrOH = 60/40, 1 mL/min],  $\lambda = 220$  nm,  $t_{major} = 34.42$  min,  $t_{minor} = 9.23$  min, **ee** >99%. The diastereomeric ratio was determined by  $^1\text{H NMR}$  **dr** >20:1.

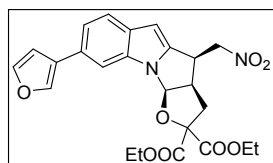

diethyl (3aR,4R,10aR)-8-(furan-3-yl)-4-(nitromethyl)-3a,10a-dihydro-4H-furo[3',2':4,5]pyrrolo[1,2-a]indole-2,2(3H)-dicarboxylate (**5i**)

**5i** was obtained as a colorless oil 43.3 mg in 46% yield for two steps after column chromatography on silica gel (petroleum ether/ethyl acetate = 6/1).  $^1\text{H NMR}$  (500 MHz,  $\text{CDCl}_3$ )  $\delta$  7.77 (d,  $J = 0.7$  Hz, 1H), 7.67 (s, 1H), 7.48 (d,  $J = 8.4$  Hz, 2H), 7.28 (dd,  $J = 6.6, 1.3$  Hz, 1H), 6.78 (dd,  $J = 6.4, 5.6$  Hz, 1H), 6.62 (d,  $J = 5.6$  Hz, 1H), 6.08 (s, 1H), 5.08 (ddd,  $J =$

20.0, 14.5, 7.7 Hz, 2H), 4.39 – 4.18 (m, 3H), 3.95 (dt,  $J = 11.6, 4.9$  Hz, 1H), 3.57 (dq,  $J = 10.6, 7.1$  Hz, 1H), 3.03 – 2.84 (m, 2H), 2.36 (dd,  $J = 14.0, 11.2$  Hz, 1H), 1.28 (t,  $J = 7.1$  Hz, 3H), 0.66 (t,  $J = 7.2$  Hz, 3H) ppm.  $^{13}\text{C NMR}$  (125 MHz,  $\text{CDCl}_3$ )  $\delta$  167.8, 167.6, 164.0, 143.5, 139.7, 138.1, 132.4, 132.4, 127.1, 126.5, 121.1, 119.4, 113.7, 109.1, 108.2, 94.5, 91.9, 87.5, 73.9, 62.6, 62.3, 48.6, 36.7, 32.5, 14.0, 13.0 ppm. **HRMS**:  $[\text{M}+\text{H}]^+$  *calcd.* For  $\text{C}_{24}\text{H}_{25}\text{N}_2\text{O}_8^+$  469.1605 found 469.1605.  $[\alpha]_{\text{D}}^{20}$  -51.75 ( $c = 0.72$  in  $\text{CHCl}_3$ ). The enantiomeric excess was determined by HPLC analysis on Daicel Chiralpak IB column [ $n$ -hexane/ $i$ -PrOH = 60/40, 1 mL/min],  $\lambda = 220$  nm,  $t_{\text{major}} = 37.72$  min,  $t_{\text{minor}} = 11.45$  min, **ee = 93%**. The diastereomeric ratio was determined by  $^1\text{H NMR}$  **dr >20:1**.

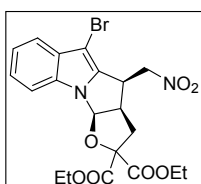

diethyl (3aR,4S,10aR)-5-bromo-4-(nitromethyl)-3a,10a-dihydro-4H-furo[3',2':4,5]pyrrolo[1,2-a]indole-2,2(3H)-dicarboxylate (**5j**)

**5j** was obtained as a colorless oil 39.4 mg in 41% yield for two steps after column chromatography on silica gel (petroleum ether/ethyl acetate = 12/1).  $^1\text{H NMR}$  (500 MHz,  $\text{CDCl}_3$ )  $\delta$  7.55 (d,  $J = 8.0$  Hz, 1H), 7.45 (d,  $J = 7.8$  Hz, 1H), 7.21 (dt,  $J = 21.9, 7.3$  Hz, 2H), 6.49 (d,  $J = 5.7$  Hz, 1H), 5.56 (dd,  $J = 15.2, 4.0$  Hz, 1H), 5.15 (dd,  $J = 15.2, 11.9$  Hz, 1H), 4.37 – 4.14 (m, 3H), 3.97 (dt,  $J = 10.9, 5.1$  Hz, 1H), 3.66 – 3.54 (m, 1H), 3.18 – 3.04 (m, 1H), 2.89 (dd,  $J = 14.2, 4.3$  Hz, 1H), 2.37 (dd,  $J = 14.1, 11.2$  Hz, 1H), 1.27 (t,  $J = 7.1$  Hz, 3H), 0.68 (t,  $J = 7.1$  Hz, 3H) ppm.  $^{13}\text{C NMR}$  (125 MHz,  $\text{CDCl}_3$ )  $\delta$  167.8, 167.4, 135.1, 132.0, 131.6, 123.2, 121.6, 119.0, 111.3, 91.9, 87.6, 83.9, 72.2, 62.7, 62.3, 48.7, 36.8, 32.4, 14.0, 13.1 ppm. **HRMS**:  $[\text{M}+\text{H}]^+$  *calcd.* For  $\text{C}_{20}\text{H}_{22}\text{BrN}_2\text{O}_7^+$  481.0605 found 481.0601.  $[\alpha]_{\text{D}}^{20}$  -12.00 ( $c = 1.25$  in  $\text{CHCl}_3$ ). The enantiomeric excess was determined by HPLC analysis on Daicel Chiralpak IB column [ $n$ -hexane/ $i$ -PrOH = 80/20, 1 mL/min],  $\lambda = 220$  nm,  $t_{\text{major}} = 24.79$  min,  $t_{\text{minor}} = 11.69$  min, **ee >99%**. The diastereomeric ratio was determined by  $^1\text{H NMR}$  **dr >20:1**.

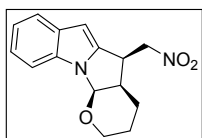

(4aR,5R,11aR)-5-(nitromethyl)-3,4,4a,11a-tetrahydro-2H,5H-pyrano[3',2':4,5]pyrrolo[1,2-a]indole (**5k**)

**5k** was obtained as a white solid 34.5 mg in 65% yield for two steps after column chromatography on silica gel (petroleum ether/ethyl acetate = 15/1).  $^1\text{H NMR}$  (500 MHz,  $\text{CDCl}_3$ )  $\delta$  7.56 (d,  $J = 7.9$  Hz, 1H), 7.51 (d,  $J = 8.1$  Hz, 1H), 7.22 – 7.17 (m, 1H), 7.15 – 7.10 (m, 1H), 6.24 (s, 1H), 5.86 (d,  $J = 4.4$  Hz, 1H), 4.87 – 4.79 (m, 1H), 4.72 (dd,  $J = 13.6, 8.1$  Hz, 1H), 4.08 (q,  $J = 7.3$  Hz, 1H), 3.85 – 3.77 (m, 1H), 3.70 (ddd,  $J = 11.6, 8.8, 2.9$  Hz, 1H), 2.98 (ddd,  $J = 12.9, 8.9, 5.6$  Hz, 1H), 2.04 – 1.95 (m, 1H), 1.72 (tdd,  $J = 12.3, 5.7, 2.8$  Hz, 1H), 1.60 (ddd,  $J = 13.7, 9.5, 5.0$  Hz, 2H) ppm.  $^{13}\text{C NMR}$  (125 MHz,  $\text{CDCl}_3$ )  $\delta$  139.6, 132.8, 132.5, 123.0, 120.9, 120.4, 110.3, 95.8, 84.6, 74.2, 62.8, 41.3, 38.4, 22.7, 21.2 ppm. **HRMS**:  $[\text{M}+\text{H}]^+$  *calcd.* For  $\text{C}_{15}\text{H}_{17}\text{N}_2\text{O}_3^+$  273.1234 found 273.1240.  $[\alpha]_{\text{D}}^{20}$  -125.31 ( $c = 1.34$  in  $\text{CHCl}_3$ ). The enantiomeric excess was determined by HPLC analysis on Daicel Chiralpak IB column [*n*-hexane/*i*-PrOH = 70/30, 1 mL/min],  $\lambda = 220$  nm,  $t_{\text{major}} = 10.65$  min,  $t_{\text{minor}} = 12.39$  min, **ee** >99%. The diastereomeric ratio was determined by  $^1\text{H NMR}$  **dr** >20:1.

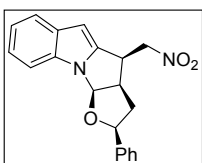

(2S,3aR,4R,10aR)-4-(nitromethyl)-2-phenyl-2,3,3a,10a-tetrahydro-4H-furo[3',2':4,5]pyrrolo[1,2-a]indole (**5l**)

**5l** was obtained as a white solid 48.8 mg in 73% yield for two steps after column chromatography on silica gel (petroleum ether/ethyl acetate = 20/1).  $^1\text{H NMR}$  (500 MHz,  $\text{CDCl}_3$ )  $\delta$  7.59 (dd,  $J = 13.2, 8.0$  Hz, 2H), 7.23 (t,  $J = 7.6$  Hz, 1H), 7.20 – 7.13 (m, 4H), 7.08 (dd,  $J = 6.2, 2.6$  Hz, 2H), 6.37 (d,  $J = 5.6$  Hz, 1H), 6.18 (s, 1H), 5.35 (dd,  $J = 10.6, 5.2$  Hz, 1H), 4.90 (dd,  $J = 13.8, 5.3$  Hz, 1H), 4.60 (dd,  $J = 13.7, 10.2$  Hz, 1H), 4.33 – 4.21 (m, 1H), 3.90 (dt,  $J = 12.9, 7.1$  Hz, 1H), 2.53 (ddd,  $J = 12.5, 7.4, 5.4$  Hz, 1H), 1.74 (dd,  $J = 22.8, 11.2$  Hz, 1H) ppm.  $^{13}\text{C NMR}$  (125 MHz,  $\text{CDCl}_3$ )  $\delta$  140.6, 138.0, 132.9, 132.4, 128.5, 127.8, 125.5, 122.0, 120.6, 120.5, 110.8, 94.9, 90.8, 84.9, 74.0, 50.5, 36.8, 36.0 ppm. **HRMS**:  $[\text{M}+\text{H}]^+$  *calcd.* For  $\text{C}_{20}\text{H}_{19}\text{N}_2\text{O}_3^+$  335.1390 found 335.1392.  $[\alpha]_{\text{D}}^{20}$  -196.17 ( $c = 1.78$  in  $\text{CHCl}_3$ ). The

enantiomeric excess was determined by HPLC analysis on Daicel Chiralpak IA column [*n*-hexane/*i*-PrOH = 90/10, 1 mL/min],  $\lambda = 220$  nm,  $t_{major} = 10.90$  min,  $t_{minor} = 12.35$  min, **ee** >99%. The diastereomeric ratio was determined by  $^1\text{H NMR}$  **dr** >20:1.

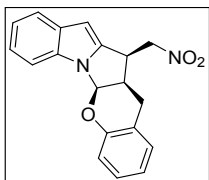

(5aR,12R,12aR)-12-(nitromethyl)-5a,12a-dihydro-12H,13H-chromeno[3',2':4,5]pyrrolo[1,2-a]indole (**5m**)

**5m** was obtained as a colorless oil 40.2 mg in 63% yield for two steps after column chromatography on silica gel (petroleum ether/ethyl acetate = 12/1).  $^1\text{H NMR}$  (500 MHz,  $\text{CDCl}_3$ )  $\delta$  7.63 (dd,  $J = 8.1, 0.6$  Hz, 1H), 7.56 (d,  $J = 7.9$  Hz, 1H), 7.28 – 7.24 (m, 1H), 7.15 (ddd,  $J = 22.7, 11.4, 4.1$  Hz, 4H), 6.99 – 6.93 (m, 1H), 6.83 (d,  $J = 7.7$  Hz, 1H), 6.34 (d,  $J = 5.9$  Hz, 1H), 6.18 (s, 1H), 4.52 – 4.43 (m, 1H), 4.30 (ddd,  $J = 16.6, 13.9, 8.5$  Hz, 2H), 3.78 – 3.69 (m, 1H), 3.23 (dd,  $J = 16.8, 7.3$  Hz, 1H), 2.82 (dd,  $J = 16.9, 3.1$  Hz, 1H) ppm.  $^{13}\text{C NMR}$  (125 MHz,  $\text{CDCl}_3$ )  $\delta$  152.6, 140.7, 132.9, 132.4, 128.5, 128.4, 122.8, 122.2, 122.0, 121.2, 120.9, 117.9, 110.5, 96.0, 83.4, 75.6, 43.2, 37.5, 24.4 ppm. **HRMS**:  $[\text{M}+\text{H}]^+$  *calcd.* For  $\text{C}_{19}\text{H}_{17}\text{N}_2\text{O}_3^+$  321.1234 found 321.1235.  $[\alpha]_{\text{D}}^{20}$  -168.34 ( $c = 3.84$  in  $\text{CHCl}_3$ ). The enantiomeric excess was determined by HPLC analysis on Daicel Chiralpak IC column [*n*-hexane/*i*-PrOH = 80/20, 1 mL/min],  $\lambda = 220$  nm,  $t_{major} = 6.99$  min,  $t_{minor} = 8.37$  min, **ee** = 98%. The diastereomeric ratio was determined by  $^1\text{H NMR}$  **dr** = 5:1.

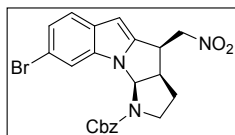

benzyl (3aR,4R,10aR)-8-bromo-4-(nitromethyl)-2,3,3a,10a-tetrahydropyrrolo[3',2':4,5]pyrrolo[1,2-a]indole-1(4H)-carboxylate (**5n**)

**5n** was obtained as a white solid 48.4 mg in 62% yield for two steps after column chromatography on silica gel (petroleum ether/ethyl acetate = 10/1).  $^1\text{H NMR}$  (500 MHz,  $\text{CDCl}_3$ )  $\delta$  7.90 (s, 1H), 7.54 (d,  $J = 2.8$  Hz, 1H), 7.45 (d,  $J = 6.8$  Hz, 1H), 7.41 (t,  $J = 7.4$  Hz, 3H), 7.39 – 7.34 (m, 2H), 7.20 (d,  $J = 8.3$  Hz, 1H), 6.32 (t,  $J = 8.2$  Hz, 1H), 6.15 (s, 1H), 5.43 (d,  $J = 12.2$  Hz, 1H), 5.22 (d,  $J = 12.1$  Hz, 1H), 4.94 (dd,  $J = 13.6, 5.1$  Hz, 1H), 4.66 (dd,  $J = 13.7,$

10.0 Hz, 1H), 4.23 (s, 1H), 3.66 (dd,  $J = 17.4, 10.0$  Hz, 1H), 3.61 – 3.53 (m, 2H), 2.19 (dt,  $J = 13.2, 6.8$  Hz, 1H), 1.80 (dt,  $J = 20.9, 10.6$  Hz, 1H) ppm.  $^{13}\text{C}$  NMR (125 MHz,  $\text{CDCl}_3$ )  $\delta$  155.7, 139.3, 136.1, 132.8, 131.4, 128.7, 128.4, 128.2, 123.5, 121.7, 115.6, 114.9, 95.2, 74.5, 73.5, 67.9, 48.3, 47.4, 37.1, 25.2 ppm. **HRMS:**  $[\text{M}+\text{H}]^+$  *calcd.* For  $\text{C}_{22}\text{H}_{21}\text{BrN}_3\text{O}_4^+$  470.0710 found 470.0713.  $[\alpha]_{\text{D}}^{20} +61.68$  ( $c = 0.89$  in  $\text{CHCl}_3$ ) The enantiomeric excess was determined by HPLC analysis on Daicel Chiralpak IB column [ $n$ -hexane/ $i$ -PrOH = 80/20, 1 mL/min],  $\lambda = 220$  nm,  $t_{\text{major}} = 39.26$  min,  $t_{\text{minor}} = 24.2$  min, **ee = 98%**. The diastereomeric ratio was determined by  $^1\text{H}$  NMR **dr = 7:1**.

## D2. Synthesis of Polycyclic Indoles via C3-Alkylation Path

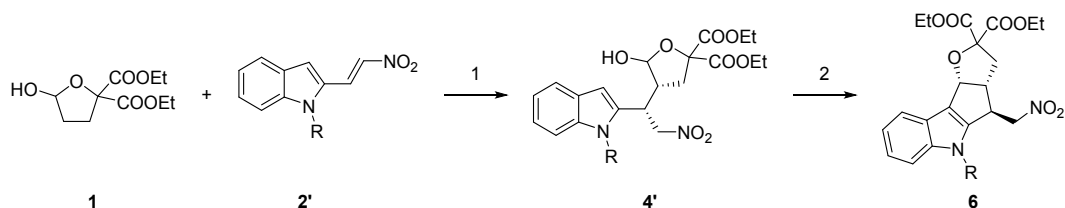

1) **3** (20 mol %), BA (20 mol %), toluene, 40 °C  
2) BF<sub>3</sub>·Et<sub>2</sub>O (1.2 eq), CH<sub>2</sub>Cl<sub>2</sub>, 0 °C

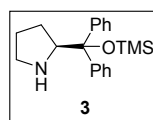

**General procedure:** A glass vial equipped with a magnetic stirring bar was charged with lactols **1** (0.20 mmol, 1.0 equiv), (*E*)-2-(2-nitrovinyl)-1*H*-indole **2'** (0.24 mmol, 1.2 equiv), **3** (0.04 mmol, 0.2 equiv) and BA (0.04 mmol, 0.2 equiv) in toluene (0.6 mL) at 40 °C. The resulting reaction mixture was kept under vigorous stirring until the consumption of lactols **1** (monitored by TLC analysis). After completion of the reaction, the reaction mixture was concentrated and the residue was purified by flash chromatography on silica gel (petroleum ether/ethyl acetate = 3:1) to afford **4'**. Then, compound **4'** (1.0 equiv) were respectively dissolved in anhydrous CH<sub>2</sub>Cl<sub>2</sub> (0.10 mmol in 1 mL) at 0 °C, and BF<sub>3</sub>·Et<sub>2</sub>O (1.2 equiv) was added to the reaction mixtures. After full conversion of the second step, the reaction mixture was concentrated and the residue was purified by flash chromatography on silica gel (petroleum ether/ethyl acetate = 6:1 to 3:1) to give product **6**.

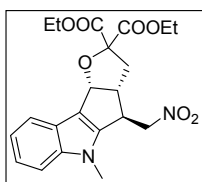

diethyl (3aR,4S,9cR)-5-methyl-4-(nitromethyl)-3a,4,5,9c-tetrahydrofuro[2',3':3,4]cyclopenta[1,2-b]indole-2,2(3H)-dicarboxylate (**6a**)

**6a** was obtained as a white solid 35.2 mg in 42% yield for two steps after column chromatography on silica gel (petroleum ether/ethyl acetate = 4/1).  $^1\text{H NMR}$  (500 MHz,  $\text{CDCl}_3$ )  $\delta$  7.70 (d,  $J = 7.9$  Hz, 1H), 7.25 – 7.18 (m, 2H), 7.18 – 7.07 (m, 1H), 6.07 (dd,  $J = 6.4$ , 0.8 Hz, 1H), 4.67 (dd,  $J = 13.0$ , 4.4 Hz, 1H), 4.41 (dd,  $J = 12.9$ , 9.5 Hz, 1H), 4.33 – 4.18 (m, 2H), 4.08 – 3.97 (m, 1H), 3.73 – 3.66 (m, 1H), 3.65 (s, 3H), 3.49 – 3.42 (m, 1H), 3.25 (dq,  $J = 10.7$ , 7.1 Hz, 1H), 2.80 (dd,  $J = 13.4$ , 4.7 Hz, 1H), 2.58 (dd,  $J = 13.3$ , 10.2 Hz, 1H), 1.26 (t,  $J = 7.1$  Hz, 3H), 0.73 (t,  $J = 7.1$  Hz, 3H) ppm.  $^{13}\text{C NMR}$  (125 MHz,  $\text{CDCl}_3$ )  $\delta$  169.0, 168.9, 142.7, 142.6, 123.1, 122.3, 120.4, 120.0, 118.9, 109.7, 93.4, 86.8, 83.0, 78.5, 62.2, 61.62, 52.5, 43.7, 39.7, 30.7, 14.0, 13.2 ppm. **HRMS**:  $[\text{M}+\text{H}]^+$  *calcd.* For Chemical Formula:  $\text{C}_{21}\text{H}_{25}\text{N}_2\text{O}_7^+$  417.1656 found 417.1660.  $[\alpha]_D^{20}$  -39.33 ( $c = 1.27$  in  $\text{CHCl}_3$ ). The enantiomeric excess was determined by HPLC analysis on Daicel Chiralpak IB column [ $n$ -hexane/ $i$ -PrOH = 80/20, 1 mL/min],  $\lambda = 220$  nm,  $t_{\text{major}} = 41.69$  min,  $t_{\text{minor}} = 18.87$  min, **ee = 99%**. The diastereomeric ratio was determined by  $^1\text{H NMR}$  **dr >20:1**.

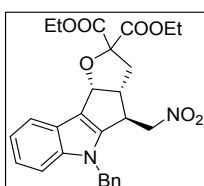

diethyl (3aR,4S,9cR)-5-benzyl-4-(nitromethyl)-3a,4,5,9c-tetrahydrofuro[2',3':3,4]cyclopenta[1,2-b]indole-2,2(3H)-dicarboxylate (**6b**)

**6b** was obtained as a colorless oil 42.1 mg in 42% yield for two steps after column chromatography on silica gel (petroleum ether/ethyl acetate = 4/1).  $^1\text{H NMR}$  (500 MHz,  $\text{CDCl}_3$ )  $\delta$  7.77 – 7.72 (m, 1H), 7.37 – 7.27 (m, 3H), 7.20 – 7.12 (m, 3H), 7.08 (d,  $J = 7.0$  Hz, 2H), 6.11 (dd,  $J = 6.5$ , 1.1 Hz, 1H), 5.29 – 5.20 (m, 2H), 4.31 (dd,  $J = 13.1$ , 3.7 Hz, 1H), 4.27 (dd,  $J = 9.1$ , 5.4 Hz, 1H), 4.25 – 4.20 (m, 1H), 4.15 (dd,  $J = 13.2$ , 10.2 Hz, 1H), 3.95 – 3.87 (m, 1H), 3.71 (dq,  $J = 10.7$ , 7.1 Hz, 1H), 3.43 (dt,  $J = 10.1$ , 4.9 Hz, 1H), 3.25 (dq,  $J = 10.7$ , 7.1 Hz, 1H), 2.78 (dd,  $J = 13.5$ , 4.6 Hz, 1H), 2.60 – 2.50 (m, 1H), 1.27 (d,  $J = 7.1$  Hz, 3H), 0.75 (t,  $J = 7.1$  Hz, 3H) ppm.  $^{13}\text{C NMR}$  (125 MHz,  $\text{CDCl}_3$ )  $\delta$  168.9, 142.5, 142.3, 136.5, 129.1, 128.1,



126.3, 123.3, 122.6, 120.7, 120.1, 110.2, 86.8, 83.0, 78.2, 62.2, 61.6, 52.6, 48.1, 44.0, 39.7, 14.0, 13.3 ppm. **HRMS**:  $[M+H]^+$  *calcd.* For Chemical Formula:  $C_{27}H_{29}N_2O_7^+$  493.1969 found 493.1964.  $[\alpha]_D^{20}$  -45.74 ( $c = 0.86$  in  $CHCl_3$ ). The enantiomeric excess was determined by HPLC analysis on Daicel Chiralpak IB column [*n*-hexane/*i*-PrOH = 80/20, 1 mL/min],  $\lambda = 220$  nm,  $t_{major} = 41.92$  min,  $t_{minor} = 24.26$  min, **ee = 99%**. The diastereomeric ratio was determined by  $^1H$  NMR **dr >20:1**.

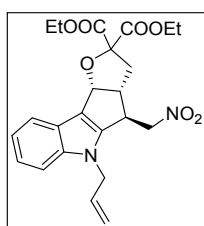

diethyl (3*aR*,4*S*,9*cR*)-5-allyl-4-(nitromethyl)-3*a*,4,5,9*c*-tetrahydrofuro[2',3':3,4]cyclopenta[1,2-*b*]indole-2,2(3*H*)-dicarboxylate (**6c**)

**6c** was obtained as a yellow oil 38.6 mg in 44% yield for two steps after column chromatography on silica gel (petroleum ether/ethyl acetate = 5/1).  $^1H$  NMR (500 MHz,  $CDCl_3$ )  $\delta$  7.72 (d,  $J = 7.8$  Hz, 1H), 7.21 (q,  $J = 8.0$  Hz, 2H), 7.17 – 7.12 (m, 1H), 6.11 (d,  $J = 6.4$  Hz, 1H), 6.06 – 5.93 (m, 1H), 5.25 (d,  $J = 10.3$  Hz, 1H), 5.02 (d,  $J = 17.1$  Hz, 1H), 4.74 – 4.69 (m, 1H), 4.69 – 4.58 (m, 2H), 4.34 – 4.22 (m, 3H), 4.02 (dd,  $J = 10.1, 3.4$  Hz, 1H), 3.70 (dq,  $J = 10.7, 7.1$  Hz, 1H), 3.48 (dt,  $J = 10.7, 5.4$  Hz, 1H), 3.23 (dq,  $J = 10.7, 7.2$  Hz, 1H), 2.81 (dd,  $J = 13.4, 4.5$  Hz, 1H), 2.57 (dd,  $J = 13.4, 10.3$  Hz, 1H), 1.27 (s, 3H), 0.75 (t,  $J = 7.1$  Hz, 3H) ppm.  $^{13}C$  NMR (125 MHz,  $CDCl_3$ )  $\delta$  169.0, 168.9, 142.2, 142.1, 132.9, 123.3, 122.5, 120.6, 120.1, 119.4, 117.4, 110.1, 86.8, 82.9, 78.4, 62.2, 61.6, 52.6, 46.9, 43.9, 39.7, 14.0, 13.2 ppm. **HRMS**:  $[M+H]^+$  *calcd.* For Chemical Formula:  $C_{23}H_{27}N_2O_7^+$  443.1813 found 443.1814.  $[\alpha]_D^{20}$  -25.64 ( $c = 0.77$  in  $CHCl_3$ ). The enantiomeric excess was determined by HPLC analysis on Daicel Chiralpak IB column [*n*-hexane/*i*-PrOH = 80/20, 1 mL/min],  $\lambda = 210$  nm,  $t_{major} = 33.55$  min,  $t_{minor} = 12.99$  min, **ee = 99%**. The diastereomeric ratio was determined by  $^1H$  NMR **dr >20:1**.

### D3. Optimization of the reaction conditions

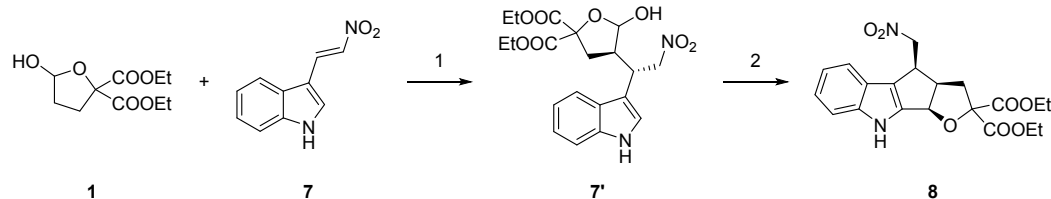

1) **cat.** (20 mol %), BA (20 mol %), toluene, 40 °C  
 2) *p*-TsOH (1.2 eq), CH<sub>2</sub>Cl<sub>2</sub>, 40 °C

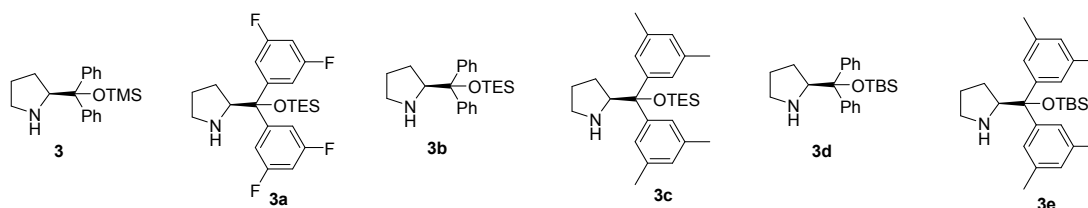

**Table S4. Optimization of the reaction conditions<sup>a</sup>**

| Entry | Solvent | Catalys   | t (h) <sup>b</sup> | Yield (%) <sup>c</sup> | ee (%) <sup>d</sup> | dr <sup>e</sup> |
|-------|---------|-----------|--------------------|------------------------|---------------------|-----------------|
|       |         | t         |                    |                        |                     |                 |
| 1     | toluene | <b>3</b>  | 64                 | 37                     | 73                  | >20:1           |
| 2     | toluene | <b>3a</b> | NR                 | NR                     | NR                  | NR              |
| 3     | toluene | <b>3b</b> | 68                 | 36                     | 91                  | >20:1           |
| 4     | toluene | <b>3c</b> | 64                 | 38                     | 90                  | >20:1           |
| 5     | toluene | <b>3d</b> | 70                 | 35                     | 97                  | >20:1           |
| 6     | toluene | <b>3e</b> | 72                 | 33                     | 96                  | >20:1           |

[a] Unless otherwise specified, all reactions were carried out using **1** (0.20 mmol, 1.0 equiv), **7** (0.24 mmol, 1.2 equiv) in solvent (0.6 mL) with **cat.** (20 mol%) and **BA** (20 mol%) at 40 °C. After workup, the mixture was purified by flash chromatography on silica gel to afford **7'**. Compound **7'** were respectively dissolved in redistilled CH<sub>2</sub>Cl<sub>2</sub> (0.10 mmol in 1 mL) at 40 °C. *p*-TsOH (1.2 eq) was added, after full conversion of the second step, the residue was purified by flash chromatography on gel to give product **8**. [b] For the first step. [c] Isolated yield of **8** over two steps. [d] Determined by HPLC analyses of isolated compound **8** on chiral stationary phases. [e] Determined by <sup>1</sup>H NMR. TMS = trimethylsilyl; TES = triethylsilyl, TBS = *tert*-butyldimethylsilyl.

## D4. Synthesis of Polycyclic Indoles via C2-Alkylation Path

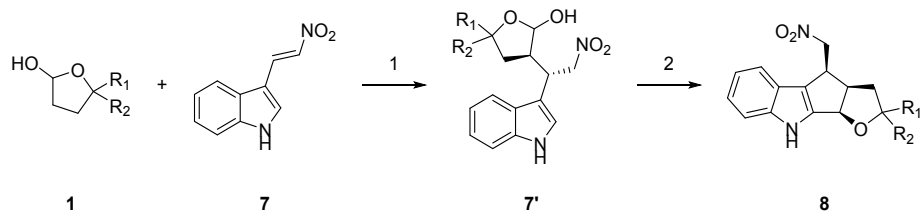

1) **3d** (20 mol %), BA (20 mol %), toluene, 40 °C  
2) *p*-TsOH (1.2 eq), CH<sub>2</sub>Cl<sub>2</sub>, 40 °C

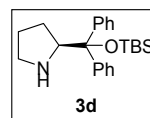

**General procedure:** A glass vial equipped with a magnetic stirring bar was charged with lactols **1** (0.20 mmol, 1.0 equiv), (*E*)-3-(2-nitrovinyl)-1*H*-indole **7** (0.24 mmol, 1.2 equiv), **3d** (0.04 mmol, 0.2 equiv) and BA (0.04 mmol, 0.2 equiv) in toluene (0.6 mL) at 40 °C. The resulting reaction mixture was kept under vigorous stirring until the consumption of lactols **1** (monitored by TLC analysis). After completion of the reaction, the reaction mixture was concentrated and the residue was purified by flash chromatography on silica gel (petroleum ether/ethyl acetate = 3:1) to afford **7'**. Then, compound **7'** (1.0 equiv) were respectively dissolved in anhydrous CH<sub>2</sub>Cl<sub>2</sub> (0.10 mmol in 1.0 mL) at 40 °C, and *p*-TsOH (1.2 equiv) was added to the reaction mixtures. After full conversion of the second step, the reaction mixture was concentrated and the residue was purified by flash chromatography on silica gel (petroleum ether/ethyl acetate = 8:1 to 4:1) to give product **8**.

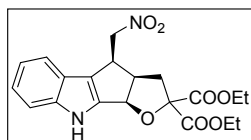

diethyl (3aR,4S,9bR)-4-(nitromethyl)-3a,4,9,9b-tetrahydrofuro[3',2':4,5]cyclopenta[1,2-b]indole-2,2(3H)-dicarboxylate (**8a**)

**8a** was obtained as a white solid 28.1 mg in 35% yield for two steps after column chromatography on silica gel (petroleum ether/dichloromethane = 1/3).  $^1\text{H NMR}$  (500 MHz,  $\text{CDCl}_3$ )  $\delta$  9.00 (s, 1H), 7.41 (d,  $J = 7.9$  Hz, 1H), 7.36 (d,  $J = 8.2$  Hz, 1H), 7.18 (t,  $J = 7.7$  Hz, 1H), 7.10 (t,  $J = 7.5$  Hz, 1H), 5.97 (d,  $J = 7.0$  Hz, 1H), 4.77 (dd,  $J = 13.1, 5.0$  Hz, 1H), 4.35 (dd,  $J = 13.1, 9.5$  Hz, 1H), 4.26 – 4.19 (m, 2H), 4.01 (dd,  $J = 9.4, 5.0$  Hz, 1H), 3.97 – 3.87 (m, 1H), 3.87 – 3.78 (m, 1H), 3.50 (dd,  $J = 14.0, 6.4$  Hz, 1H), 2.80 (dt,  $J = 15.4, 7.7$  Hz, 1H), 2.72 (dd,  $J = 13.4, 5.7$  Hz, 1H), 1.21 (t,  $J = 7.1$  Hz, 3H), 0.99 (t,  $J = 7.1$  Hz, 3H) ppm.  $^{13}\text{C NMR}$  (125 MHz,  $\text{CDCl}_3$ )  $\delta$  168.6, 168.4, 142.2, 141.0, 122.9, 122.5, 120.3, 119.0, 118.1, 112.7, 87.7, 81.9, 79.4, 62.4, 62.3, 52.5, 43.7, 39.7, 13.9, 13.7 ppm. **HRMS**:  $[\text{M}+\text{H}]^+$  *calcd.* For Chemical Formula:  $\text{C}_{20}\text{H}_{23}\text{N}_2\text{O}_7^+$  403.1500 found 403.1502.  $[\alpha]_{\text{D}}^{20}$  -24.71 ( $c = 0.72$  in  $\text{CHCl}_3$ ). The enantiomeric excess was determined by HPLC analysis on Daicel Chiralpak IC column [*n*-hexane/*i*-PrOH = 80/20, 1 mL/min],  $\lambda = 220$  nm,  $t_{\text{major}} = 20.69$  min,  $t_{\text{minor}} = 17.25$  min, **ee** = **97%**. The diastereomeric ratio was determined by  $^1\text{H NMR}$  **dr** >**20:1**. (The absolute configuration of compound **8a** is determined by the configuration of compound **17**.)

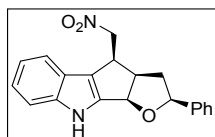

(2S,3aR,4S,9bR)-4-(nitromethyl)-2-phenyl-2,3,3a,4,9,9b-hexahydrofuro[3',2':4,5]cyclopenta[1,2-b]indole (**8b**)

**8b** was obtained as a white solid 26.7 mg in 40% yield for two steps after column chromatography on silica gel (petroleum ether/ethyl acetate = 8/1).  $^1\text{H NMR}$  (500 MHz,  $\text{CDCl}_3$ )  $\delta$  8.59 (s, 1H), 8.39 (s, 1H), 7.41 (d,  $J = 7.9$  Hz, 1H), 7.34 – 7.27 (m, 5H), 7.19 (t,  $J = 5.8$  Hz, 2H), 7.12 (td,  $J = 8.2, 4.5$  Hz, 1H), 5.66 (d,  $J = 7.4$  Hz, 1H), 5.17 – 5.07 (m, 2H), 4.61 (dd,  $J = 13.7, 10.5$  Hz, 1H), 4.27 – 4.20 (m, 1H), 3.94 (dq,  $J = 11.3, 7.3$  Hz, 1H), 2.48 – 2.37 (m, 1H), 1.79 (q,  $J = 11.3$  Hz, 1H) ppm.  $^{13}\text{C NMR}$  (125 MHz,  $\text{CDCl}_3$ )  $\delta$  142.9, 141.5, 140.5, 128.5, 128.1, 126.2, 126.0, 123.3, 122.5, 120.3, 118.7, 116.1, 112.5, 83.9, 79.9, 75.0, 51.6, 37.9, 37.6 ppm. **HRMS**:  $[\text{M}+\text{H}]^+$  *calcd.* For Chemical Formula:  $\text{C}_{20}\text{H}_{19}\text{N}_2\text{O}_3^+$  335.1390 found

335.1386.  $[\alpha]_D^{20} +13.67$  ( $c = 1.8$  in  $\text{CHCl}_3$ ). The enantiomeric excess was determined by HPLC analysis on Daicel Chiralpak IB column [ $n$ -hexane/ $i$ -PrOH = 90/10, 1 mL/min],  $\lambda = 220$  nm,  $t_{\text{major}} = 10.98$  min,  $t_{\text{minor}} = 11.72$  min, **ee >99%**. The diastereomeric ratio was determined by  $^1\text{H}$  NMR **dr = 5:1**.

## E. Synthetic transformations

### E1. Modification of C3 position of Indole Moiety in **4**

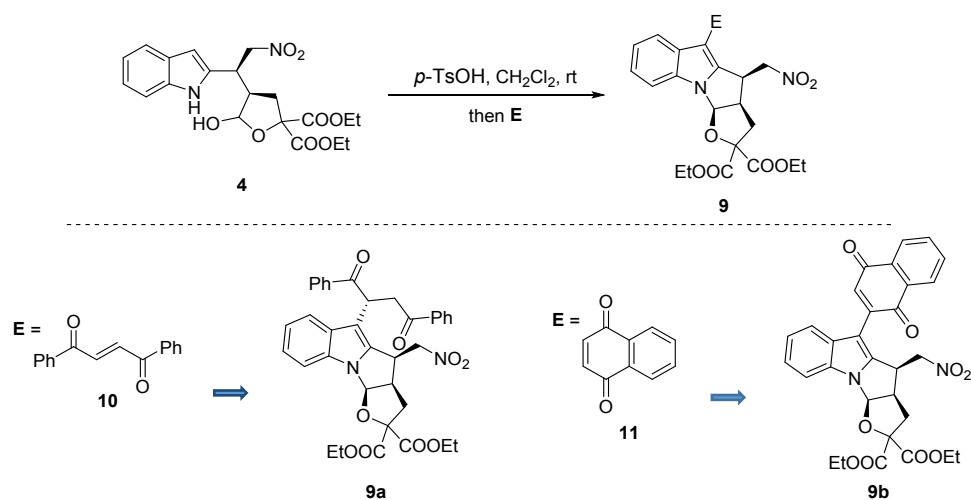

**General procedure:** To a suspension of **4** (1.0 equiv) were respectively dissolved in anhydrous CH<sub>2</sub>Cl<sub>2</sub> (0.10 mmol in 1.0 mL) at 25 °C, and then *p*-TsOH (1.0 equiv) was added to the reaction mixtures. After the compound **4** was completely consumed (TLC control), then the **E** was added at the same temperature. After completion of the reaction, the reaction mixture was concentrated and the residue was purified by flash chromatography on silica gel (petroleum ether/ethyl acetate = 10:1 to 6:1) to give the product **9**.

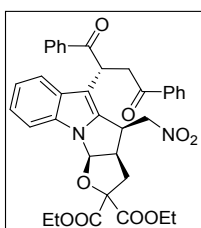

diethyl (3aR,4R,10aR)-5-((R)-1,4-dioxo-1,4-diphenylbutan-2-yl)-4-(nitromethyl)-3a,10a-dihydro-4H-furo[3',2':4,5]pyrrolo[1,2-a]indole-2,2(3H)-dicarboxylate (9a)

**9a** was obtained as a colorless oil 33.5 mg in 51% yield for two steps after column chromatography on silica gel (petroleum ether/ethyl acetate = 10/1).  $^1\text{H NMR}$  (500 MHz,  $\text{CDCl}_3$ )  $\delta$  7.97 (dd,  $J = 17.4, 7.4$  Hz, 4H), 7.62 (d,  $J = 7.5$  Hz, 1H), 7.59 – 7.51 (m, 2H), 7.45 (dd,  $J = 10.9, 4.2$  Hz, 3H), 7.37 (t,  $J = 7.6$  Hz, 2H), 7.20 – 7.12 (m, 2H), 6.40 (d,  $J = 5.9$  Hz, 1H), 5.88 (dd,  $J = 14.6, 4.0$  Hz, 1H), 5.50 (t,  $J = 6.2$  Hz, 1H), 5.42 – 5.34 (m, 1H), 4.27 (ddq,  $J = 39.7, 10.8, 7.1$  Hz, 2H), 4.04 (s, 1H), 3.98 (dd,  $J = 18.2, 7.2$  Hz, 1H), 3.88 (dt,  $J = 14.3, 7.6$  Hz, 1H), 3.44 (dd,  $J = 18.2, 5.8$  Hz, 1H), 3.36 (td,  $J = 14.2, 6.9$  Hz, 1H), 2.98 (dd,  $J = 14.1, 3.2$  Hz, 1H), 2.84 – 2.70 (m, 1H), 2.28 (dd,  $J = 14.0, 11.3$  Hz, 1H), 1.27 (t,  $J = 5.5$  Hz, 3H), 0.45 (t,  $J = 7.0$  Hz, 3H) ppm.  $^{13}\text{C NMR}$  (125 MHz,  $\text{CDCl}_3$ )  $\delta$  199.4, 198.2, 168.2, 167.4, 136.4, 136.3, 135.9, 133.4, 133.0, 132.1, 131.7, 128.6, 128.6, 128.6, 128.2, 122.5, 121.3, 118.6, 111.3, 106.1, 91.2, 87.2, 73.5, 62.6, 62.1, 48.2, 41.5, 36.9, 32.7, 14.0, 12.8 ppm. **HRMS**:  $[\text{M}+\text{H}]^+$  calcd. For Chemical Formula:  $\text{C}_{36}\text{H}_{35}\text{N}_2\text{O}_9^+$  639.2337 found 639.2334.  $[\alpha]_D^{20}$  -131 ( $c = 2.16$  in  $\text{CHCl}_3$ ). The enantiomeric excess was determined by HPLC analysis on Daicel Chiralpak IC column [ $n$ -hexane/ $i$ -PrOH = 80/20, 1 mL/min],  $\lambda = 220$  nm,  $t_{\text{major}} = 30.92$  min,  $t_{\text{minor}} = 17.32$  min, **ee** >99%. The diastereomeric ratio was determined by  $^1\text{H NMR}$  **dr** >20:1. (The absolute configuration of compound **9a** is derived from the the X-ray data of **5n**.)

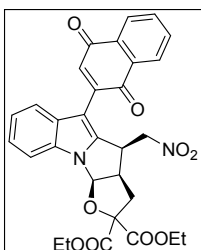

diethyl (3aR,4R,10aR)-5-(1,4-dioxo-1,4-dihydronaphthalen-2-yl)-4-(nitromethyl)-3a,10a-dihydro-4H-furo[3',2':4,5]pyrrolo[1,2-a]indole-2,2(3H)-dicarboxylate (9b)

**9b** was obtained as a brown syrup 31.3 mg in 56% yield for two steps after column chromatography on silica gel (petroleum ether/ethyl acetate = 10/1).  $^1\text{H NMR}$  (500 MHz,

CDCl<sub>3</sub>)  $\delta$  8.13 (d,  $J = 7.4$  Hz, 2H), 7.84 – 7.72 (m, 2H), 7.64 (d,  $J = 8.5$  Hz, 2H), 7.28 – 7.19 (m, 3H), 6.65 (d,  $J = 5.9$  Hz, 1H), 5.07 (dd,  $J = 14.8, 11.3$  Hz, 1H), 4.82 – 4.74 (m, 1H), 4.64 (dd,  $J = 14.9, 3.8$  Hz, 1H), 4.27 (ddq,  $J = 39.6, 10.8, 7.1$  Hz, 2H), 4.17 – 4.03 (m, 1H), 3.67 – 3.59 (m, 1H), 3.12 (dq,  $J = 10.6, 7.2$  Hz, 1H), 2.85 (dd,  $J = 14.2, 4.0$  Hz, 1H), 2.38 (dd,  $J = 14.2, 11.1$  Hz, 1H), 1.26 (s, 3H), 0.69 (t,  $J = 7.1$  Hz, 3H) ppm. <sup>13</sup>C NMR (125 MHz, CDCl<sub>3</sub>)  $\delta$  185.7, 184.8, 167.8, 167.4, 141.7, 140.9, 134.5, 134.3, 133.7, 132.2, 132.1, 132.0, 131.4, 127.1, 126.1, 123.1, 122.3, 119.2, 111.7, 101.8, 92.0, 87.6, 73.4, 62.7, 62.4, 48.3, 38.9, 32.9, 14.0, 13.1 ppm. **HRMS:** [M+H]<sup>+</sup> *calcd.* For Chemical Formula: C<sub>30</sub>H<sub>27</sub>N<sub>2</sub>O<sub>9</sub><sup>+</sup> 559.1711 found 559.1709. The diastereomeric ratio was determined by <sup>1</sup>H NMR ***dr* >20:1**.



## E2. Modification of C3 position of Indole Moiety in **5a**

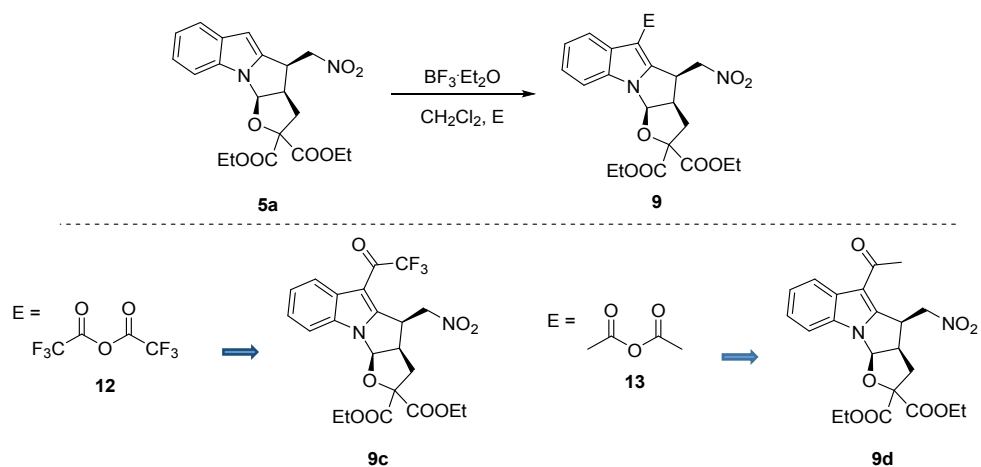

**General procedure:** To a suspension of **5a** (1.0 equiv) were respectively dissolved in anhydrous  $\text{CH}_2\text{Cl}_2$  (0.10 mmol in 1.0 mL) at 0 °C, and  $\text{BF}_3 \cdot \text{Et}_2\text{O}$  (1.0 equiv) was added to the reaction mixtures, then the **E** was added at the same temperature. After completion of the reaction, the reaction mixture was concentrated and the residue was purified by flash chromatography on silica gel (petroleum ether/ethyl acetate = 10:1 to 6:1) to give the product **9**.

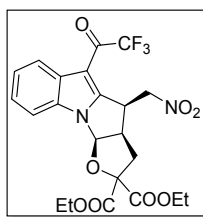

diethyl (3aR,4R,10aR)-4-(nitromethyl)-5-(2,2,2-trifluoroacetyl)-3a,10a-dihydro-4H-furo[3',2':4,5]pyrrolo[1,2-a]indole-2,2(3H)-dicarboxylate (**9c**)

**9c** was obtained as a colorless oil 26.4 mg in 53% yield for one steps after column chromatography on silica gel (petroleum ether/ethyl acetate = 10/1).  $^1\text{H NMR}$  (500 MHz,  $\text{CDCl}_3$ )  $\delta$  7.91 (d,  $J = 4.7$  Hz, 1H), 7.74 – 7.67 (m, 1H), 7.35 (dd,  $J = 6.0, 3.0$  Hz, 2H), 6.58 (d,  $J = 6.2$  Hz, 1H), 6.07 (dd,  $J = 15.6, 3.7$  Hz, 1H), 5.08 (dd,  $J = 15.5, 11.6$  Hz, 1H), 4.59 – 4.49 (m, 1H), 4.38 – 4.22 (m, 2H), 4.18 – 4.06 (m, 1H), 3.75 – 3.63 (m, 1H), 3.37 – 3.21 (m, 1H), 2.89 (dd,  $J = 14.4, 3.9$  Hz, 1H), 2.43 (dd,  $J = 14.2, 11.3$  Hz, 1H), 1.28 (t,  $J = 7.1$  Hz, 3H), 0.70 (t,  $J = 7.1$  Hz, 3H) ppm.  $^{13}\text{C NMR}$  (125 MHz,  $\text{CDCl}_3$ )  $\delta$  175.8, 167.7, 166.9, 151.9, 132.1, 128.3, 124.5, 124.3, 121.3, 118.0, 115.7, 112.2, 105.9, 92.5, 91.7, 87.9, 71.4, 62.9, 62.6, 48.0, 39.2, 32.7, 14.0, 13.1 ppm. **HRMS**:  $[\text{M}+\text{H}]^+$  *calcd.* For Chemical Formula:  $\text{C}_{22}\text{H}_{22}\text{F}_3\text{N}_2\text{O}_8^+$  499.1323 found 499.1322.  $[\alpha]_{\text{D}}^{20} +45.56$  ( $c = 0.9$  in  $\text{CHCl}_3$ ). The diastereomeric ratio was determined by  $^1\text{H NMR}$  **dr** >20:1.

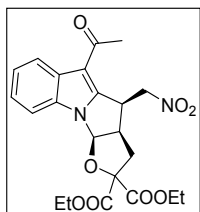

diethyl (3aR,4R,10aR)-5-acetyl-4-(nitromethyl)-3a,10a-dihydro-4H-furo[3',2':4,5]pyrrolo[1,2-a]indole-2,2(3H)-dicarboxylate (**9d**)

**9d** was obtained as a colorless oil 33.1 mg in 75% yield for one steps after column chromatography on silica gel (petroleum ether/ethyl acetate = 10/1).  $^1\text{H NMR}$  (500 MHz,  $\text{CDCl}_3$ )  $\delta$  7.83 (d,  $J = 7.1$  Hz, 1H), 7.71 – 7.65 (m, 1H), 7.35 – 7.27 (m, 2H), 6.54 (d,  $J = 6.1$  Hz, 1H), 6.30 (dd,  $J = 15.6, 4.0$  Hz, 1H), 5.00 (dd,  $J = 15.6, 11.7$  Hz, 1H), 4.46 (ddd,  $J = 11.9, 8.3, 4.0$  Hz, 1H), 4.35 – 4.21 (m, 2H), 4.04 (ddd,  $J = 10.9, 9.7, 6.0$  Hz, 1H), 3.67 (dq,  $J = 10.8, 7.1$  Hz, 1H), 3.25 (dq,  $J = 10.7, 7.1$  Hz, 1H), 2.87 (dd,  $J = 14.2, 4.3$  Hz, 1H), 2.68 (s, 3H), 2.38 (dt,  $J = 19.2, 9.6$  Hz, 1H), 1.28 (t,  $J = 6.6$  Hz, 3H), 0.72 (t,  $J = 7.1$  Hz, 3H) ppm.  $^{13}\text{C NMR}$  (125 MHz,  $\text{CDCl}_3$ )  $\delta$  194.5, 167.7, 167.2, 146.2, 132.0, 130.2, 123.3, 123.0, 120.7, 112.1, 110.0,

92.3, 87.8, 72.1, 62.8, 62.4, 48.1, 38.5, 32.7, 31.2, 14.0, 13.1 ppm. **HRMS:**  $[M+H]^+$  *calcd.* For  
Chemical Formula:  $C_{22}H_{25}N_2O_8^+$  445.1605 found 445.1600.  $[\alpha]_D^{20}$  +56.95 ( $c = 1.08$  in  
 $CHCl_3$ ). The diastereomeric ratio was determined by  $^1H$  NMR ***dr* >20:1**.

### E3. Useful Transformations of Product **5a**

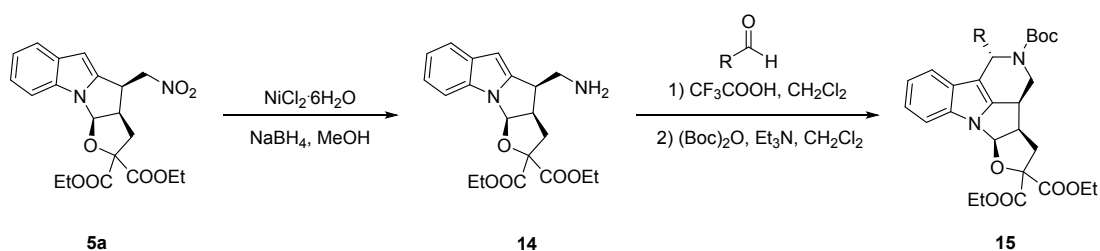

**General procedure:** To a suspension of **5a** (41.0 mg, 0.10 mmol, 1.0 equiv),  $\text{NiCl}_2 \cdot 6\text{H}_2\text{O}$  (28.5 mg, 0.12 mmol, 1.2 equiv.) in 1.0 mL  $\text{MeOH}$  was carefully added  $\text{NaBH}_4$  (45.6 mg, 1.20 mmol, 12.0 equiv.) and stirred at  $0^\circ\text{C}$  for 1 h. The mixture was then quenched with sat.  $\text{NH}_4\text{Cl}$  and extracted with  $\text{CH}_2\text{Cl}_2$  ( $3 \times 5$  mL). The combined organic layers were washed with brine, dried over  $\text{MgSO}_4$ , and concentrated to give a yellow oil. Subsequently, the crude intermediate was dissolved in a solution of aldehyde (0.30 mmol, 3.0 equiv) in  $\text{CH}_2\text{Cl}_2$ , followed by adding TFA (17.0 mg, 0.15 mmol, 1.5 equiv, TFA = trifluoroacetic acid). The mixture was stirred for 12 h at room temperature. The solution was quenched with sat.  $\text{NaHCO}_3$  and extracted with  $\text{CH}_2\text{Cl}_2$  ( $3 \times 5$  mL). The combined organic phases were dried over  $\text{MgSO}_4$  and concentrated to give a white oil. the crude intermediate was dissolved in a solution of di-*tert*-butyl dicarbonate (65.5 mg, 0.30 mmol, 3.0 equiv) in  $\text{CH}_2\text{Cl}_2$ , followed by adding  $\text{Et}_3\text{N}$  (3.0 mg, 0.03 mmol, 0.3 equiv,  $\text{Et}_3\text{N}$  = triethylamine). After filtered and concentrated, the residue was purified by flash column chromatography to yield **15** as an brown syrup.

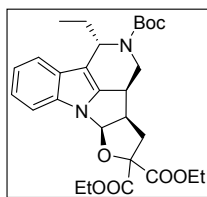

2-(*tert*-butyl) 5,5-diethyl (1*S*,3*aR*,3*bR*,6*aR*)-1-ethyl-3,3*a*,3*b*,6*a*-tetrahydrobenzo[*b*]furo[2,3-*e*]pyrido[3,4,5-*gh*]pyrrolizine-2,5,5(1*H*,4*H*)-tricarboxylate (**15a**)

**15a** was obtained as a colorless oil 20.5 mg in 41% yield for three steps after column chromatography on silica gel (petroleum ether/ethyl acetate = 4/1). <sup>1</sup>H NMR (500 MHz, CDCl<sub>3</sub>) δ 7.47 (dd, *J* = 6.9, 1.6 Hz, 1H), 7.44 – 7.41 (m, 1H), 7.09 (dq, *J* = 7.2, 5.8 Hz, 2H), 6.69 (d, *J* = 4.7 Hz, 1H), 5.10 (dd, *J* = 7.8, 4.1 Hz, 1H), 4.30 – 4.17 (m, 2H), 4.05 (dd, *J* = 12.8, 7.7 Hz, 1H), 3.84 – 3.73 (m, 1H), 3.65 (dd, *J* = 12.8, 7.1 Hz, 1H), 3.57 – 3.45 (m, 2H), 3.23 (dq, *J* = 10.7, 7.1 Hz, 1H), 2.30 (ddd, *J* = 21.7, 13.9, 9.0 Hz, 2H), 2.07 – 1.98 (m, 1H), 1.87 – 1.74 (m, 1H), 1.49 (s, 9H), 1.24 (t, *J* = 7.1 Hz, 3H), 0.92 (t, *J* = 7.4 Hz, 3H), 0.86 (t, *J* = 7.1 Hz, 3H) ppm. <sup>13</sup>C NMR (125 MHz, CDCl<sub>3</sub>) δ 168.5, 166.5, 155.7, 143.5, 134.3, 131.5, 120.9, 120.3, 118.6, 112.5, 109.4, 95.3, 89.0, 79.8, 62.4, 61.8, 54.0, 53.8, 42.7, 31.8, 31.6, 30.2, 28.5, 14.0, 13.4, 10.0 ppm. HRMS: [M+H]<sup>+</sup> *calcd.* For Chemical Formula: C<sub>28</sub>H<sub>37</sub>N<sub>2</sub>O<sub>7</sub><sup>+</sup> 513.2595 found 513.2597. [α]<sub>D</sub><sup>20</sup> -68.68 (*c* = 1.43 in CHCl<sub>3</sub>). The diastereomeric ratio was determined by <sup>1</sup>H NMR *dr* >20:1.

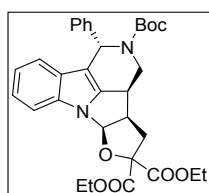

2-(*tert*-butyl) 5,5-diethyl (1*S*,3*aR*,3*bR*,6*aR*)-1-phenyl-3,3*a*,3*b*,6*a*-tetrahydrobenzo[*b*]furo[2,3-*e*]pyrido[3,4,5-*gh*]pyrrolizine-2,5,5(1*H*,4*H*)-tricarboxylate (**15b**)

**15b** was obtained as a colorless oil 25.2 mg in 46% yield for three steps after column chromatography on silica gel (petroleum ether/ethyl acetate = 4/1). <sup>1</sup>H NMR (500 MHz, CDCl<sub>3</sub>) δ 7.44 (dd, *J* = 15.5, 7.8 Hz, 2H), 7.39 (d, *J* = 7.6 Hz, 2H), 7.26 (t, *J* = 7.6 Hz, 2H), 7.15 (t, *J* = 7.3 Hz, 1H), 7.11 – 7.02 (m, 2H), 6.73 (d, *J* = 4.7 Hz, 1H), 6.06 (s, 1H), 4.44 (s, 1H), 4.25 (dddd, *J* = 25.0, 10.7, 7.1, 3.6 Hz, 2H), 3.88 – 3.79 (m, 1H), 3.70 – 3.62 (m, 2H), 3.53 (tt, *J* = 13.9, 5.2 Hz, 1H), 3.06 (dq, *J* = 14.7, 7.2 Hz, 1H), 2.47 (dd, *J* = 13.9, 6.8 Hz, 1H), 2.32 (dd, *J* = 13.9, 10.4 Hz, 1H), 1.29 – 1.24 (m, 11H), 0.87 (t, *J* = 7.1 Hz, 3H) ppm. <sup>13</sup>C NMR (125

MHz, CDCl<sub>3</sub>)  $\delta$  168.4, 166.6, 156.1, 145.1, 142.9, 134.5, 130.6, 128.3, 126.3, 125.9, 121.1, 120.3, 118.4, 112.5, 108.9, 95.5, 88.9, 80.3, 62.4, 61.8, 57.1, 53.2, 43.9, 32.6, 31.5, 28.2, 14.0, 13.4 ppm. **HRMS:** [M+H]<sup>+</sup> *calcd.* For Chemical Formula: C<sub>32</sub>H<sub>37</sub>N<sub>2</sub>O<sub>7</sub><sup>+</sup> 561.2595 found 561.2591. [ $\alpha$ ]<sub>D</sub><sup>20</sup> -33.52 (*c* = 1.26 in CHCl<sub>3</sub>). The diastereomeric ratio was determined by <sup>1</sup>H NMR *dr* >20:1.

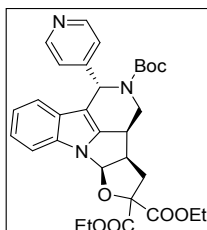

2-(*tert*-butyl) 5,5-diethyl (1*S*,3*aR*,3*bR*,6*aS*)-1-(pyridin-4-yl)-3,3*a*,3*b*,6*a*-tetrahydrobenzo[*b*]furo[2,3-*e*]pyrido[3,4,5-*gh*]pyrrolizine-2,5,5(1*H*,4*H*)-tricarboxylate (15c)

**15c** was obtained as a colorless oil 26.4 mg in 47% yield for three steps after column chromatography on silica gel (petroleum ether/ethyl acetate = 2/1). <sup>1</sup>H NMR (500 MHz, CDCl<sub>3</sub>)  $\delta$  8.50 – 8.43 (m, 2H), 7.45 (d, *J* = 7.8 Hz, 1H), 7.38 (d, *J* = 7.7 Hz, 1H), 7.31 (d, *J* = 6.0 Hz, 2H), 7.07 (dtd, *J* = 14.9, 7.8, 1.1 Hz, 2H), 6.76 (d, *J* = 4.8 Hz, 1H), 5.88 (s, 1H), 4.64 (s, 1H), 4.30 – 4.19 (m, 2H), 3.89 (ddt, *J* = 10.8, 7.9, 5.4 Hz, 1H), 3.69 (dd, *J* = 15.9, 8.2 Hz, 1H), 3.58 – 3.45 (m, 2H), 2.87 (dq, *J* = 10.6, 7.1 Hz, 1H), 2.59 (dd, *J* = 14.0, 5.8 Hz, 1H), 2.28 (dd, *J* = 14.0, 10.9 Hz, 1H), 1.25 (dd, *J* = 8.2, 6.0 Hz, 12H), 0.86 (d, *J* = 7.1 Hz, 3H) ppm. <sup>13</sup>C NMR (125 MHz, CDCl<sub>3</sub>)  $\delta$  168.1, 166.6, 156.0, 149.8, 142.9, 134.0, 129.8, 121.4, 120.6, 120.5, 118.1, 112.6, 110.0, 95.6, 88.8, 81.0, 62.5, 61.8, 57.1, 52.6, 45.0, 32.7, 31.4, 28.1, 14.0, 13.4 ppm. **HRMS:** [M+H]<sup>+</sup> *calcd.* For Chemical Formula: C<sub>31</sub>H<sub>36</sub>N<sub>3</sub>O<sub>7</sub><sup>+</sup> 562.2548 found 562.2549. [ $\alpha$ ]<sub>D</sub><sup>20</sup> -48.03 (*c* = 1.66 in CHCl<sub>3</sub>). The diastereomeric ratio was determined by <sup>1</sup>H NMR *dr* >20:1.

## E4. Synthesis of Spiro-fused 2-Azido Indoline 17 via Radical-mediated dearomatization reaction

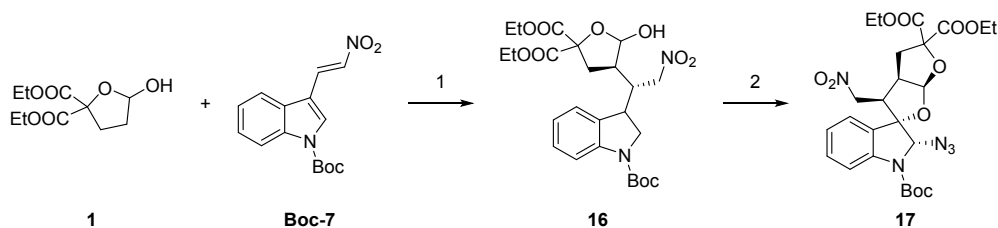

1) **3** (20 mol %), BA (20 mol %), toluene, 25 °C  
 2) Ce(NH<sub>4</sub>)<sub>2</sub>(NO<sub>2</sub>)<sub>6</sub>, NaN<sub>3</sub>, MeCN, 0 °C

**General procedure:** A glass vial equipped with a magnetic stirring bar was charged with lactols **1** (0.20 mmol, 1.0 equiv), *tert-butyl* (*E*)-3-(2-nitrovinyl)-1*H*-indole-1-carboxylate **Boc-7** (0.24 mmol, 1.2 equiv), **3** (0.04 mmol, 0.2 equiv) and C<sub>6</sub>H<sub>5</sub>COOH (0.04 mmol, 0.2 equiv) in toluene (0.6 mL) at 25 °C. The resulting reaction mixture was kept under vigorous stirring until the consumption of lactols **1** (monitored by TLC analysis). After completion of the reaction, the reaction mixture was concentrated and the residue was purified by flash chromatography on silica gel (petroleum ether/ethyl acetate = 5:1) to afford **16**. To a suspension of **16** (52.2 mg, 0.10 mmol), NaN<sub>3</sub> (9.4 mg, 0.15 mmol NaN<sub>3</sub> = sodium azide) in MeCN (2.0 mL) was slowly added a solution of ceric ammonium nitrate (0.08 M in acetonitrile) (3.75 mL, 0.30 mmol) under N<sub>2</sub> at 0 °C. Upon stirring at 0 °C for 3 h, the reaction mixture was quenched with water, extracted with ethyl acetate, washed with water, dried over MgSO<sub>4</sub>, filtered, concentrated, and was separated by C-18 column (MeCN/H<sub>2</sub>O = 70/30, t<sub>R</sub> = 52 min) to give **17** as white oil (15.0 mg, 28% yield).

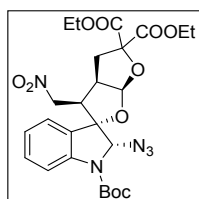

**1'-(tert-butyl) 5,5-diethyl (2S,2'S,3R,3aR,6aR)-2'-azido-3-(nitromethyl)-3a,6a-dihydro-3H-spiro[furo[2,3-b]furan-2,3'-indoline]-1',5,5(4H)-tricarboxylate (17)**

**17** was obtained as a colorless oil 15.0 mg in 28% yield for two steps after separated by C-18 column (MeCN/H<sub>2</sub>O = 70/30, t<sub>R</sub> = 52 min). <sup>1</sup>H NMR (500 MHz, CDCl<sub>3</sub>) δ 7.93 (s, 1H), 7.44 (t, J = 7.6 Hz, 1H), 7.34 (d, J = 7.6 Hz, 1H), 7.13 (t, J = 7.5 Hz, 1H), 6.37 (s, 1H), 6.01 (d,

$J = 5.8$  Hz, 1H), 5.07 – 4.91 (m, 1H), 4.48 (d,  $J = 14.0$  Hz, 1H), 4.38 (s, 1H), 4.32 – 4.23 (m, 3H), 3.73 – 3.59 (m, 1H), 3.54 – 3.35 (m, 1H), 2.80 (dd,  $J = 13.6, 9.8$  Hz, 1H), 2.75 – 2.65 (m, 1H), 1.61 (s, 9H), 1.40 – 1.27 (m, 6H) ppm.  $^{13}\text{C}$  NMR (125 MHz,  $\text{CDCl}_3$ )  $\delta$  168.9, 167.2, 132.1, 123.8, 123.1, 116.3, 110.1, 87.2, 83.4, 80.2, 72.3, 62.7, 62.5, 45.1, 43.8, 33.1, 28.1, 14.0, 14.0 ppm. **HRMS:**  $[\text{M}+\text{H}]^+$  *calcd.* For Chemical Formula: Chemical Formula:  $\text{C}_{25}\text{H}_{31}\text{N}_5\text{NaO}_{10}^+$  584.1963 found 584.1967.  $[\alpha]_{\text{D}}^{20} +74.10$  ( $c = 2.58$  in  $\text{CHCl}_3$ ). The enantiomeric excess was determined by HPLC analysis on Daicel Chiralpak IA column [*n*-hexane/*i*-PrOH = 75/25, 1 mL/min],  $\lambda = 220$  nm,  $t_{\text{major}} = 5.50$  min,  $t_{\text{minor}} = 5.88$  min, **ee** >99%. The diastereomeric ratio was determined by  $^1\text{H}$  NMR **dr** >20:1.



## F. NMR spectra and HPLC traces

### The $^1\text{H}$ NMR spectrum of 5a (500 MHz, $\text{CDCl}_3$ )

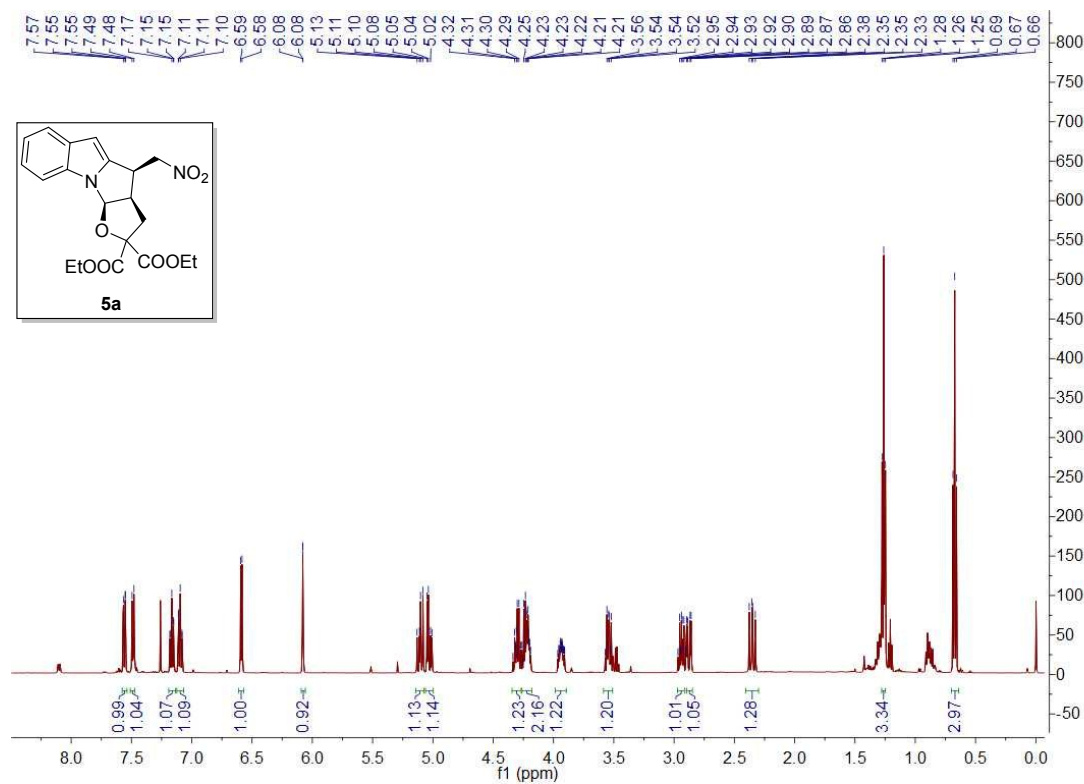

### The $^{13}\text{C}$ NMR spectrum of 5a (125 MHz, $\text{CDCl}_3$ )

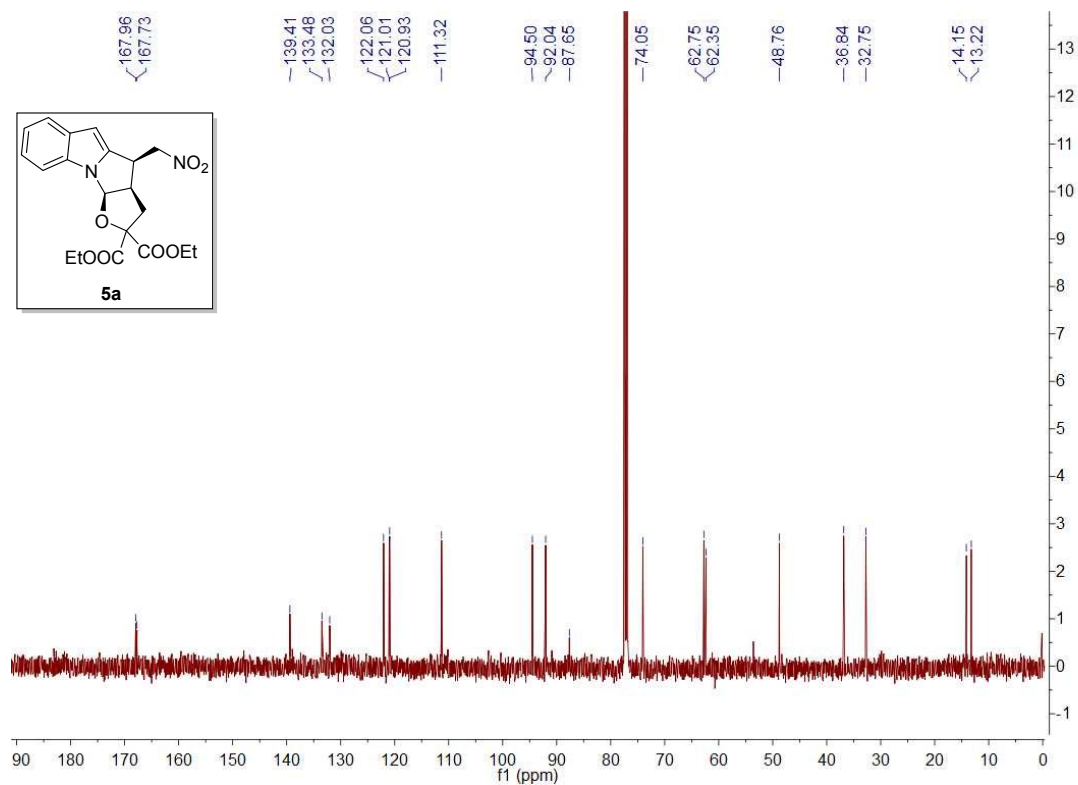

## The HPLC of racemic 5a

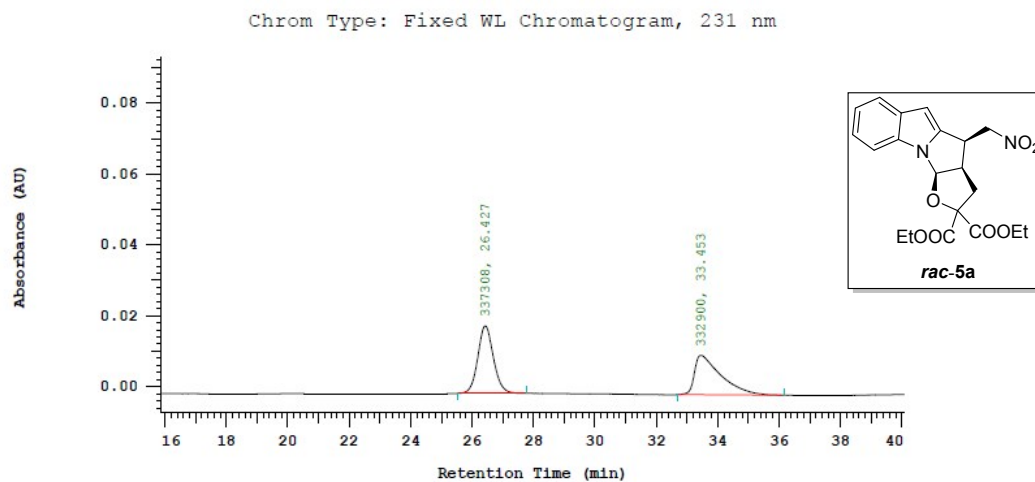

Chrom Type: Fixed WL Chromatogram, 231 nm  
 Peak Quantitation: AREA  
 Calculation Method: AREA%

| No. | RT     | Area   | Area %  | BC |
|-----|--------|--------|---------|----|
| 1   | 26.427 | 337308 | 50.329  | BB |
| 2   | 33.453 | 332900 | 49.671  | BB |
|     |        | 670208 | 100.000 |    |

## The HPLC of chiral 5a

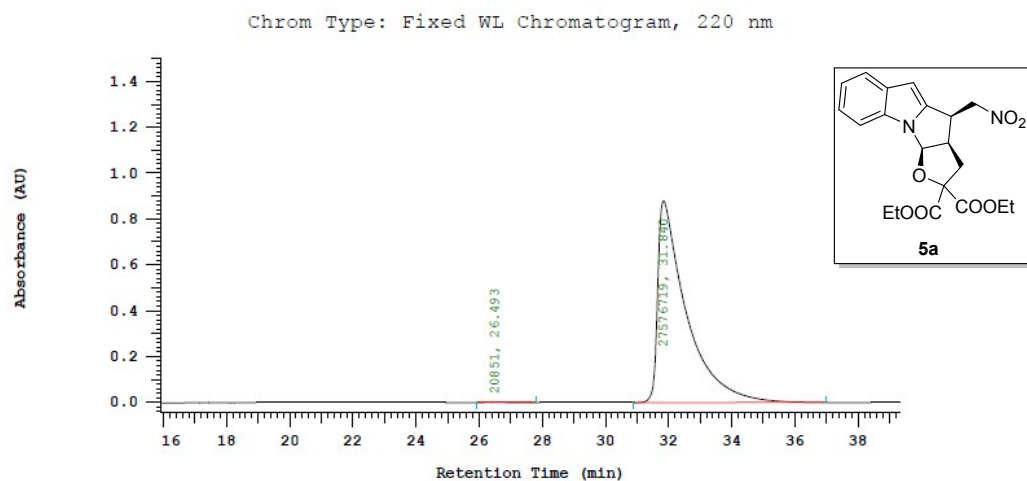

Chrom Type: Fixed WL Chromatogram, 220 nm  
 Peak Quantitation: AREA  
 Calculation Method: AREA%

| No. | RT     | Area     | Area %  | BC |
|-----|--------|----------|---------|----|
| 1   | 26.493 | 20851    | 0.076   | BB |
| 2   | 31.840 | 27576719 | 99.924  | BB |
|     |        | 27597570 | 100.000 |    |

The <sup>1</sup>H NMR spectrum of 5b (500 MHz, CDCl<sub>3</sub>)

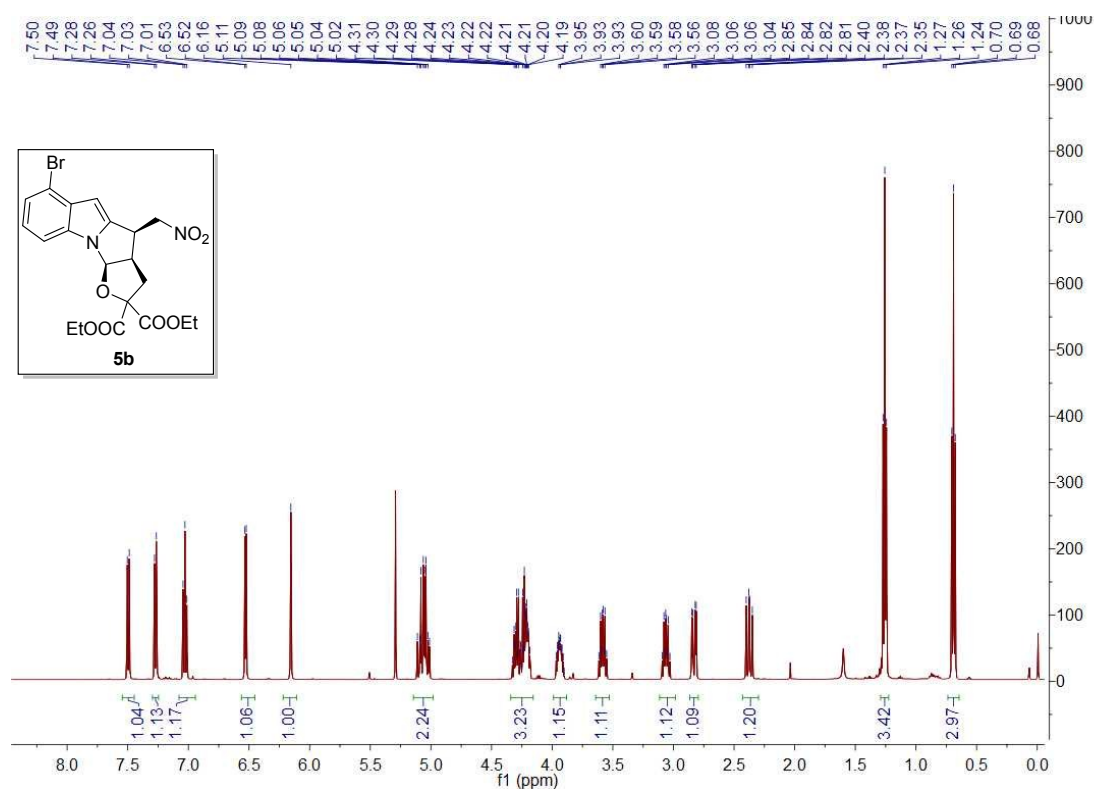

The <sup>13</sup>C NMR spectrum of 5b (125 MHz, CDCl<sub>3</sub>)

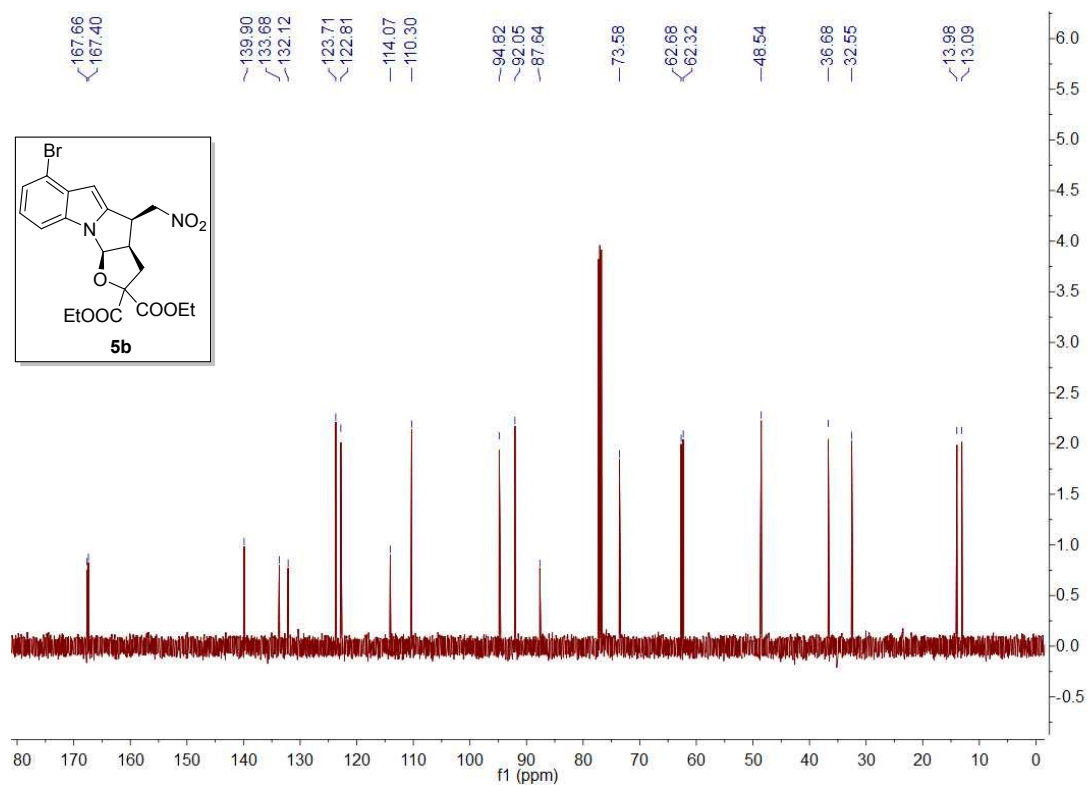

## The HPLC of racemic 5b

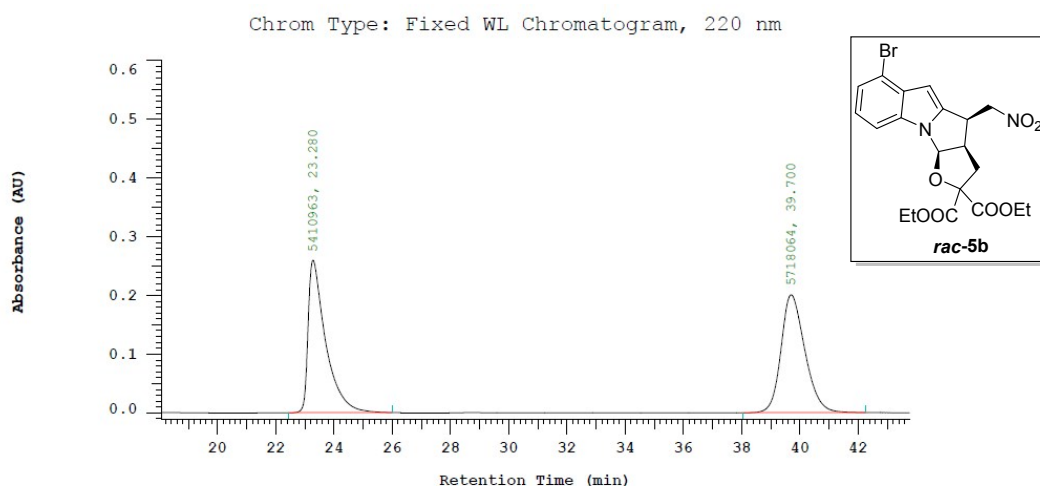

Chrom Type: Fixed WL Chromatogram, 220 nm  
 Peak Quantitation: AREA  
 Calculation Method: AREA%

| No. | RT     | Area     | Area %  | BC |
|-----|--------|----------|---------|----|
| 1   | 23.280 | 5410963  | 48.620  | BB |
| 2   | 39.700 | 5718064  | 51.380  | BB |
|     |        | 11129027 | 100.000 |    |

## The HPLC of chiral 5b

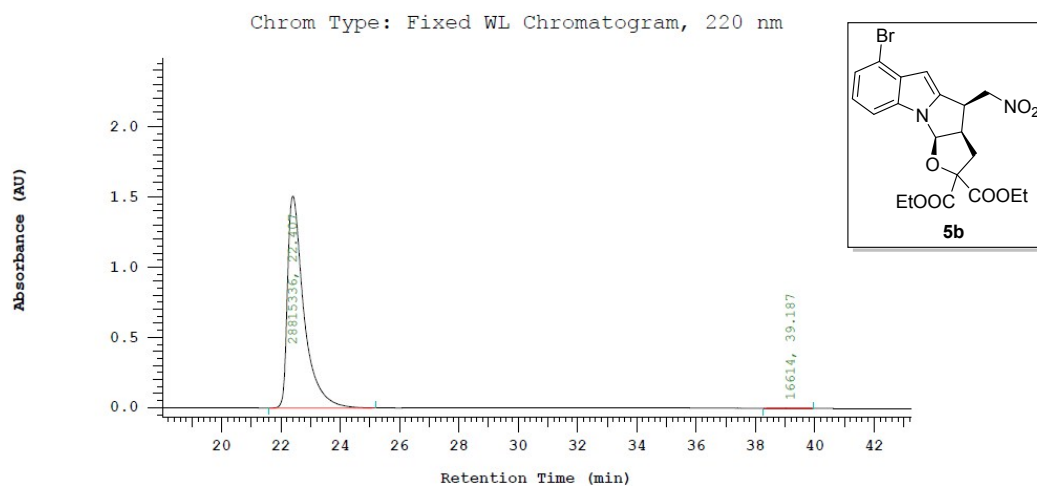

Chrom Type: Fixed WL Chromatogram, 220 nm  
 Peak Quantitation: AREA  
 Calculation Method: AREA%

| No. | RT     | Area     | Area %  | BC |
|-----|--------|----------|---------|----|
| 1   | 22.407 | 28815336 | 99.942  | BB |
| 2   | 39.187 | 16614    | 0.058   | BB |
|     |        | 28831950 | 100.000 |    |

### The <sup>1</sup>H NMR spectrum of 5c (500 MHz, CDCl<sub>3</sub>)

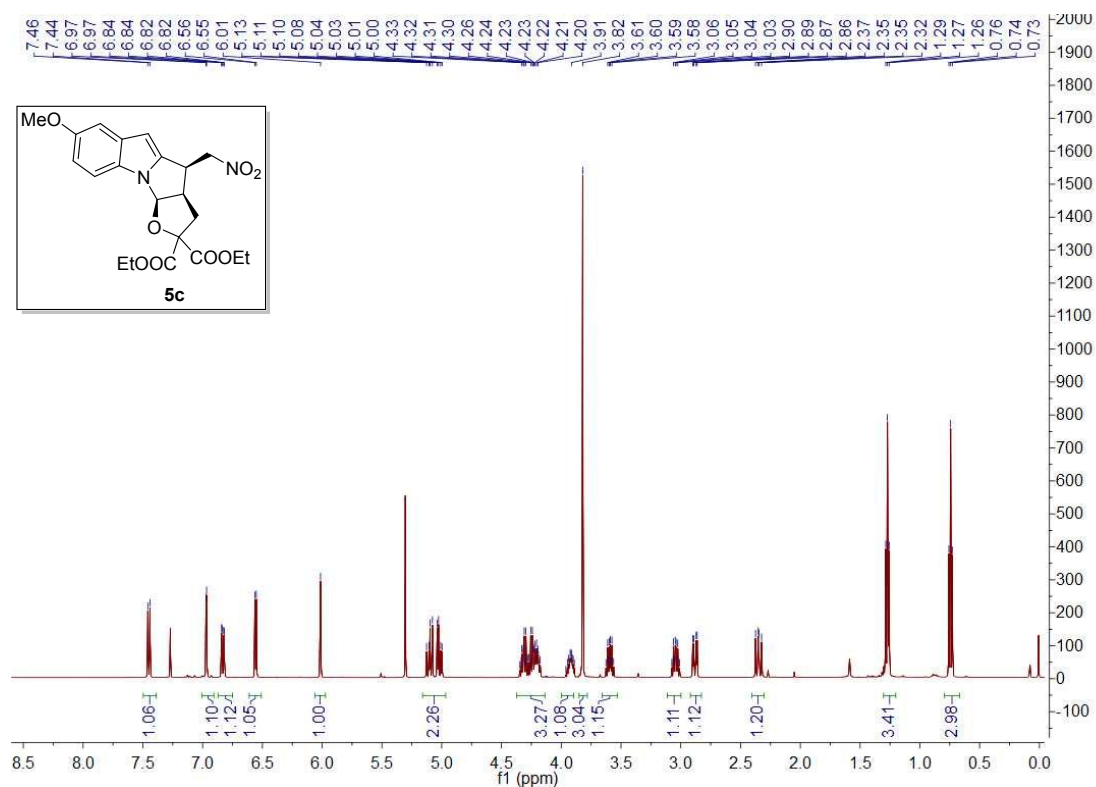

### The <sup>13</sup>C NMR spectrum of 5c (125 MHz, CDCl<sub>3</sub>)

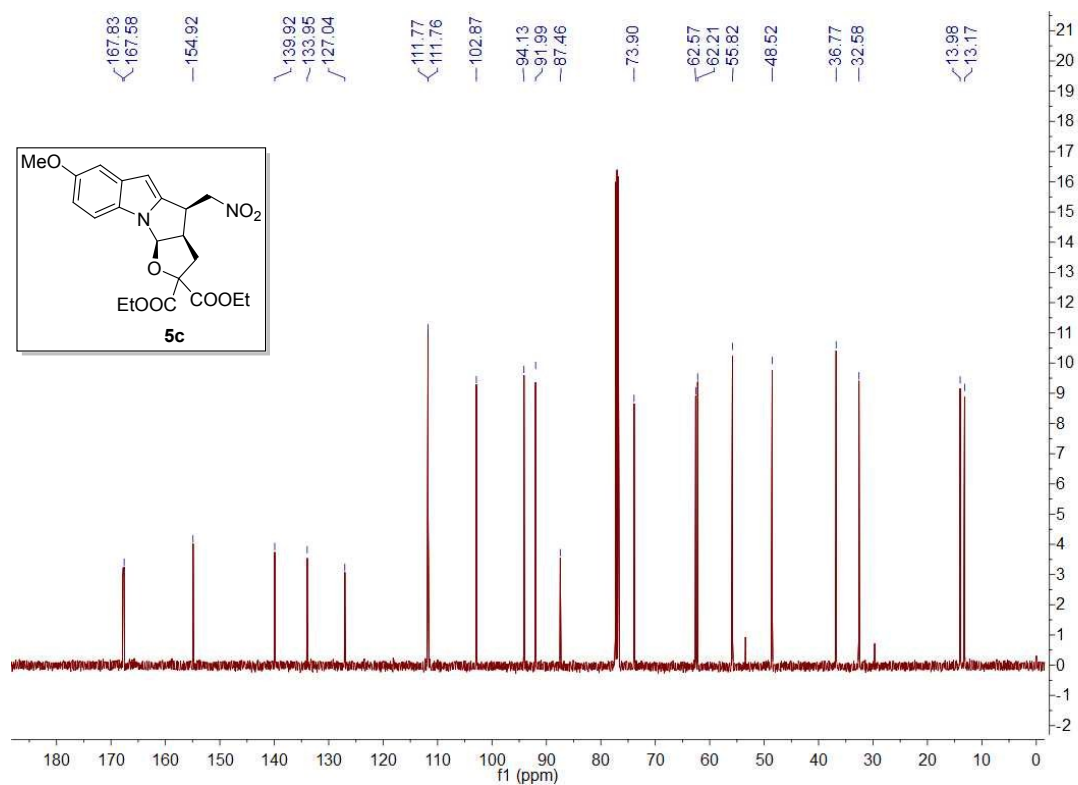

## The HPLC of racemic 5c

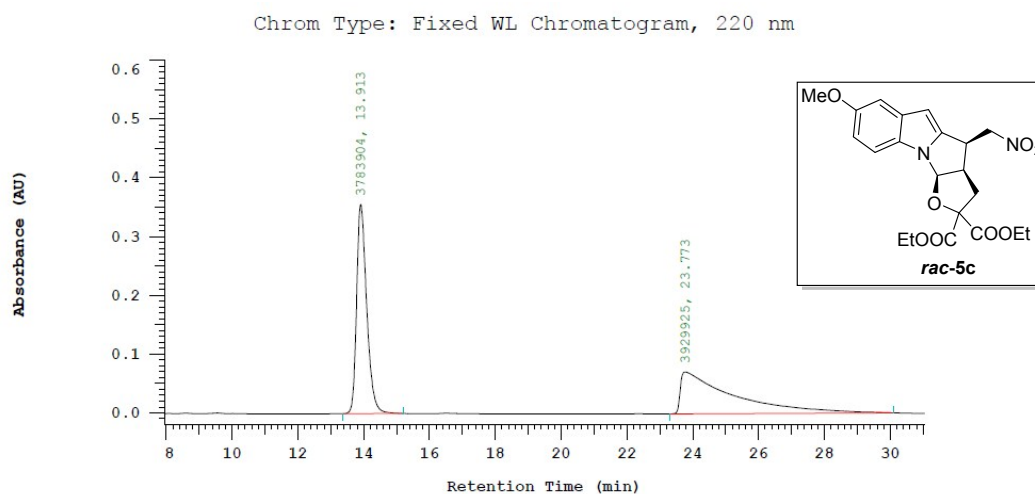

Chrom Type: Fixed WL Chromatogram, 220 nm  
 Peak Quantitation: AREA  
 Calculation Method: AREA%

| No. | RT     | Area    | Area %  | BC |
|-----|--------|---------|---------|----|
| 1   | 13.913 | 3783904 | 49.054  | BB |
| 2   | 23.773 | 3929925 | 50.946  | BB |
|     |        | 7713829 | 100.000 |    |

## The HPLC of chiral 5c

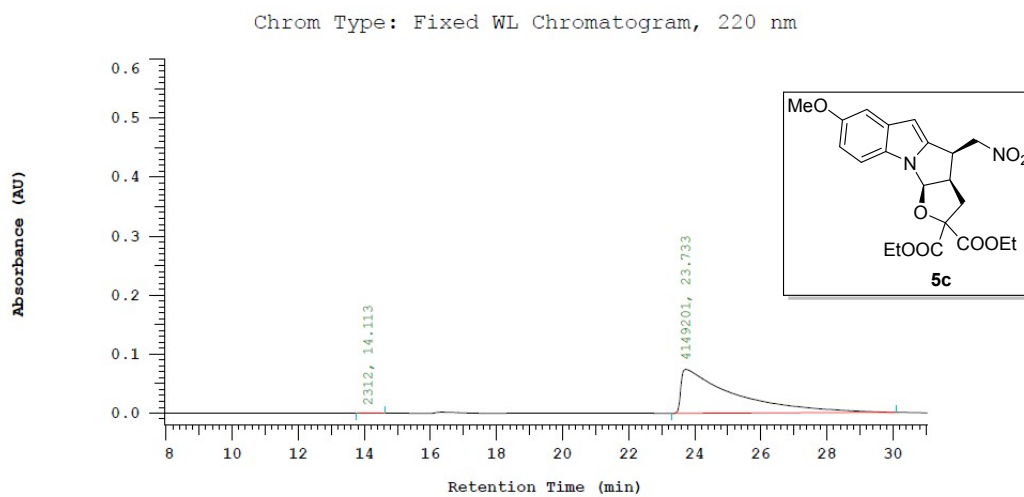

Chrom Type: Fixed WL Chromatogram, 220 nm  
 Peak Quantitation: AREA  
 Calculation Method: AREA%

| No. | RT     | Area    | Area %  | BC |
|-----|--------|---------|---------|----|
| 1   | 14.113 | 2312    | 0.056   | BB |
| 2   | 23.733 | 4149201 | 99.944  | BB |
|     |        | 4151513 | 100.000 |    |

### The $^1\text{H}$ NMR spectrum of 5d (500 MHz, $\text{CDCl}_3$ )

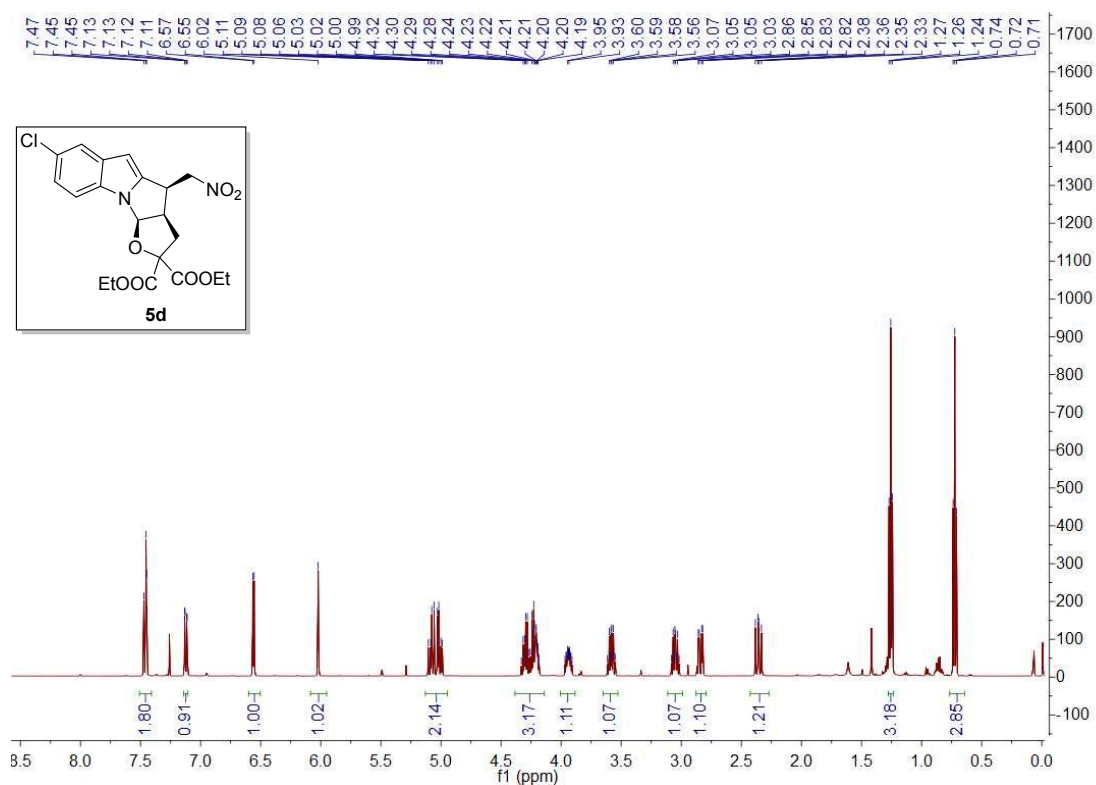

### The $^{13}\text{C}$ NMR spectrum of 5d (125 MHz, $\text{CDCl}_3$ )

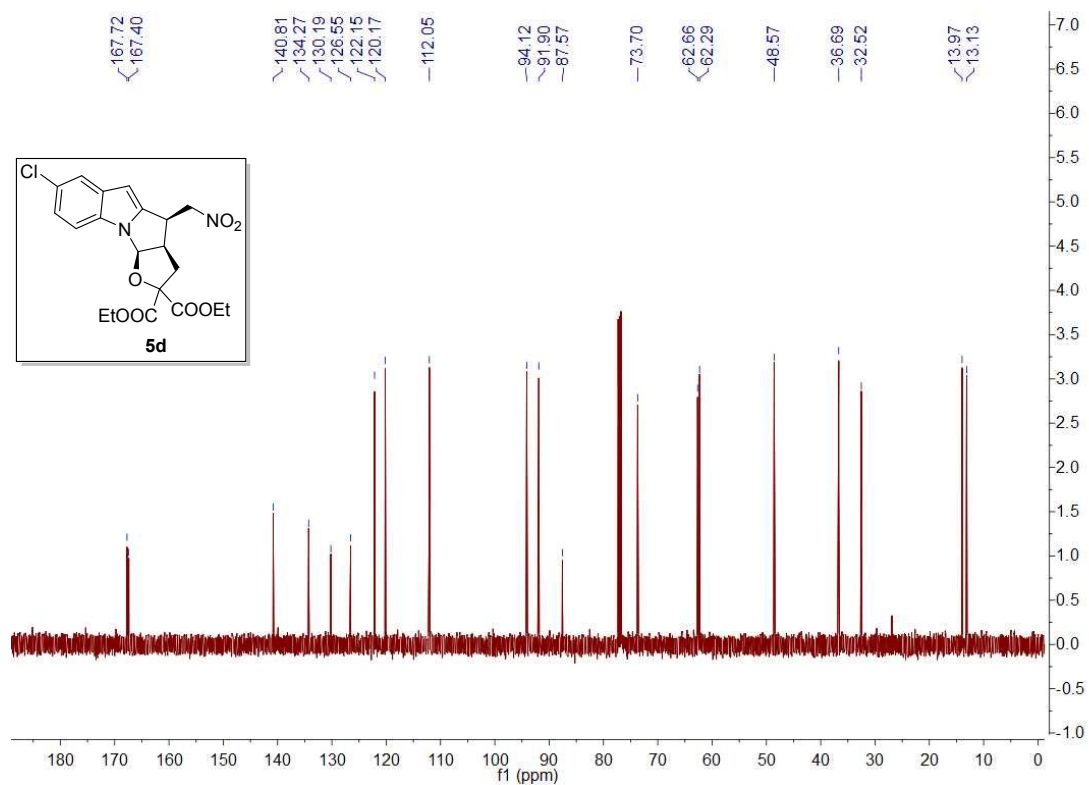



## The HPLC of racemic 5d

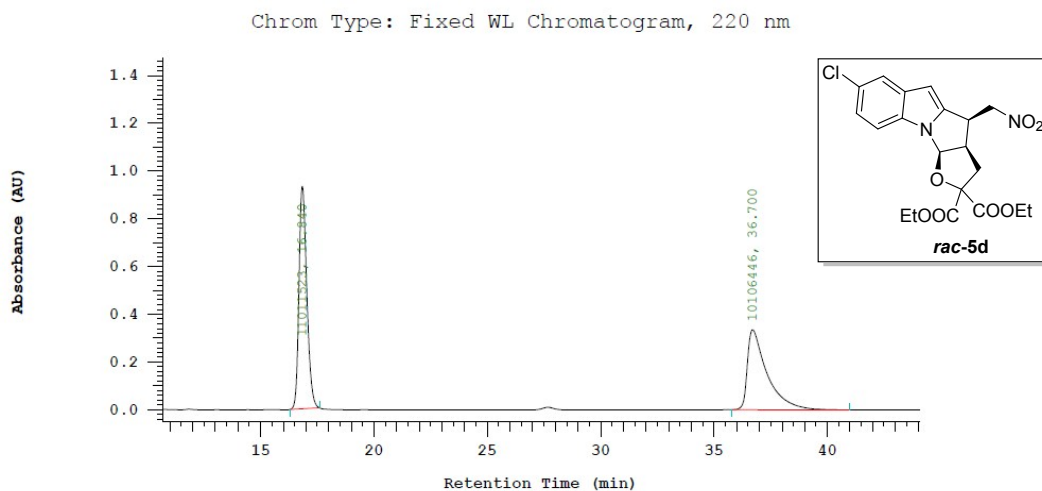

Chrom Type: Fixed WL Chromatogram, 220 nm  
 Peak Quantitation: AREA  
 Calculation Method: AREA%

| No. | RT     | Area     | Area %  | BC |
|-----|--------|----------|---------|----|
| 1   | 16.840 | 11011523 | 52.143  | BB |
| 2   | 36.700 | 10106446 | 47.857  | BB |
|     |        | 21117969 | 100.000 |    |

## The HPLC of chiral 5d

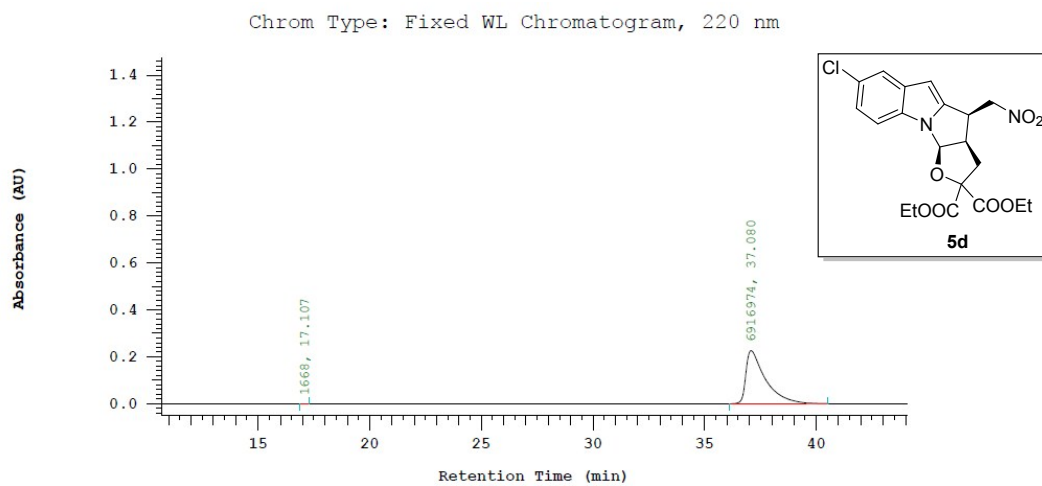

Chrom Type: Fixed WL Chromatogram, 220 nm  
 Peak Quantitation: AREA  
 Calculation Method: AREA%

| No. | RT     | Area    | Area %  | BC |
|-----|--------|---------|---------|----|
| 1   | 17.107 | 1668    | 0.024   | BB |
| 2   | 37.080 | 6916974 | 99.976  | BB |
|     |        | 6918642 | 100.000 |    |



The <sup>1</sup>H NMR spectrum of 5e (500 MHz, CDCl<sub>3</sub>)

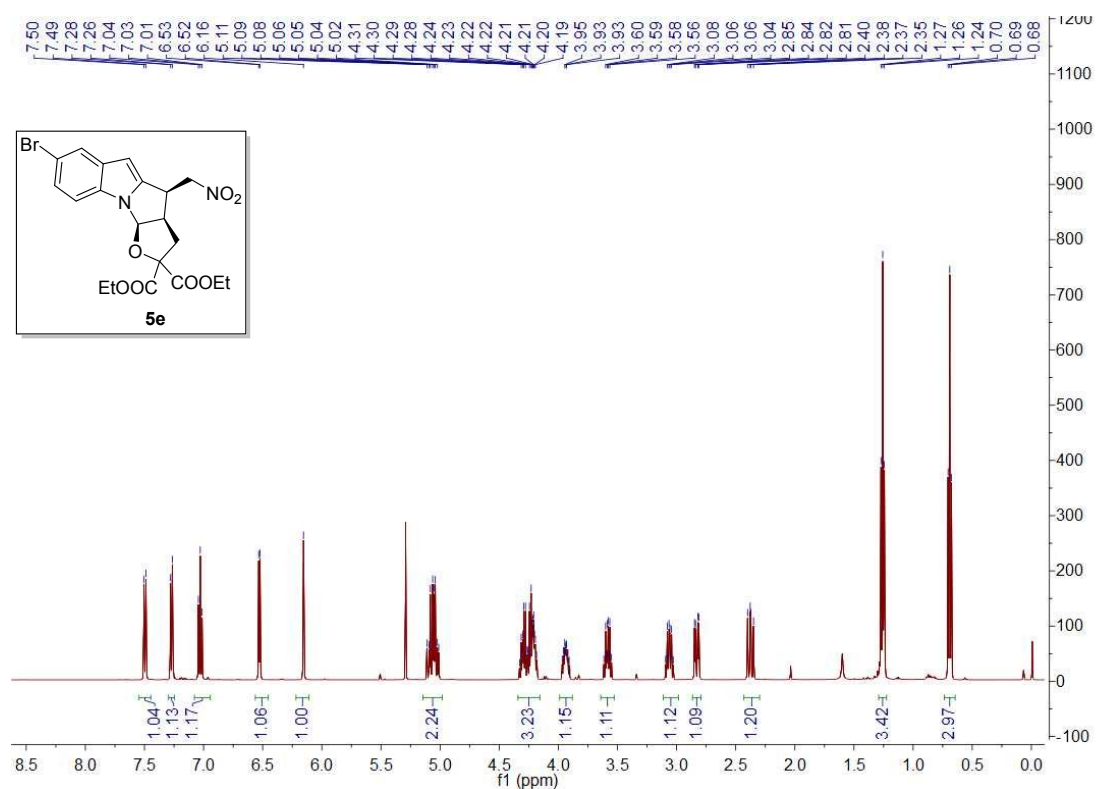

The <sup>13</sup>C NMR spectrum of 5e (125 MHz, CDCl<sub>3</sub>)

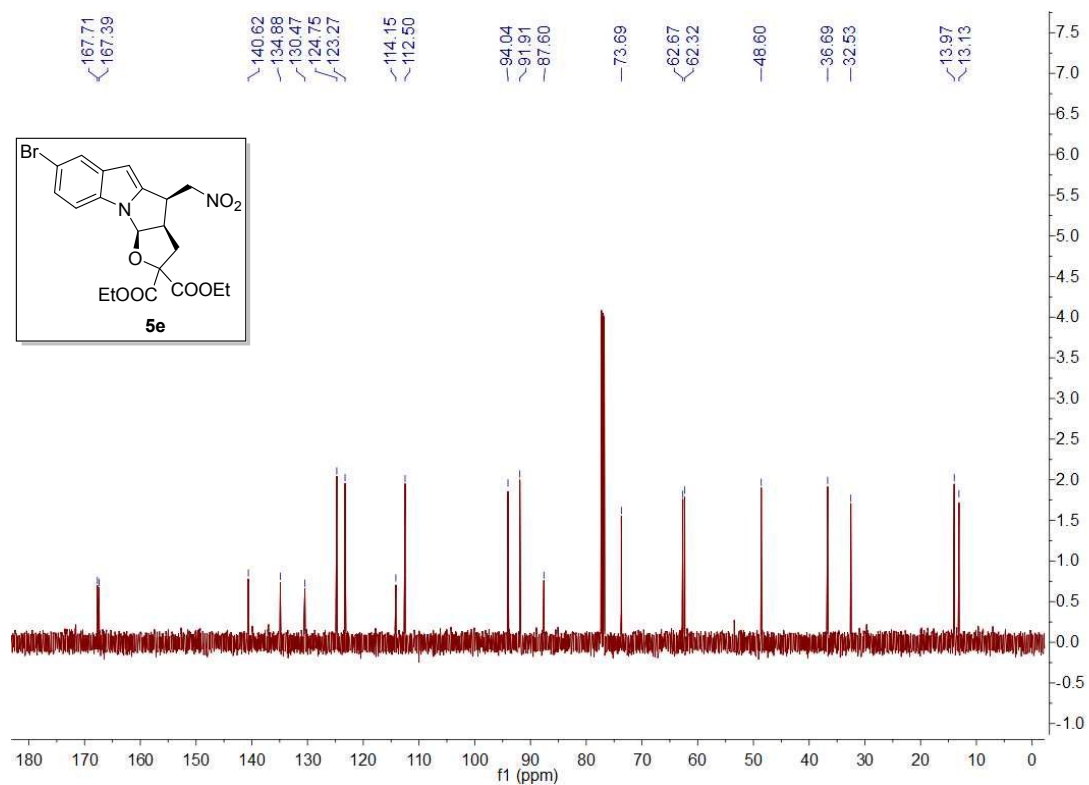

## The HPLC of racemic 5e

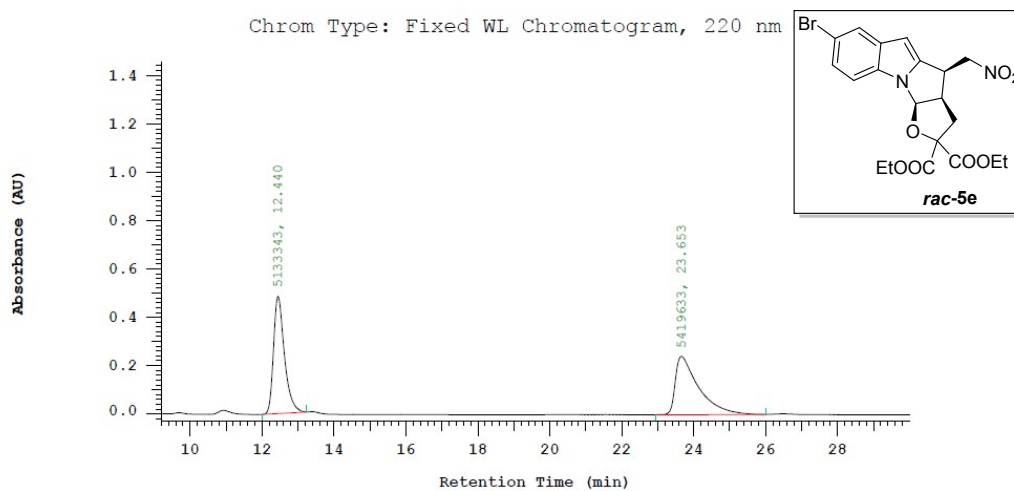

Chrom Type: Fixed WL Chromatogram, 220 nm  
 Peak Quantitation: AREA  
 Calculation Method: AREA%

| No. | RT     | Area     | Area %  | BC |
|-----|--------|----------|---------|----|
| 1   | 12.440 | 5133343  | 48.644  | BB |
| 2   | 23.653 | 5419633  | 51.356  | BB |
|     |        | 10552976 | 100.000 |    |

## The HPLC of chiral 5e

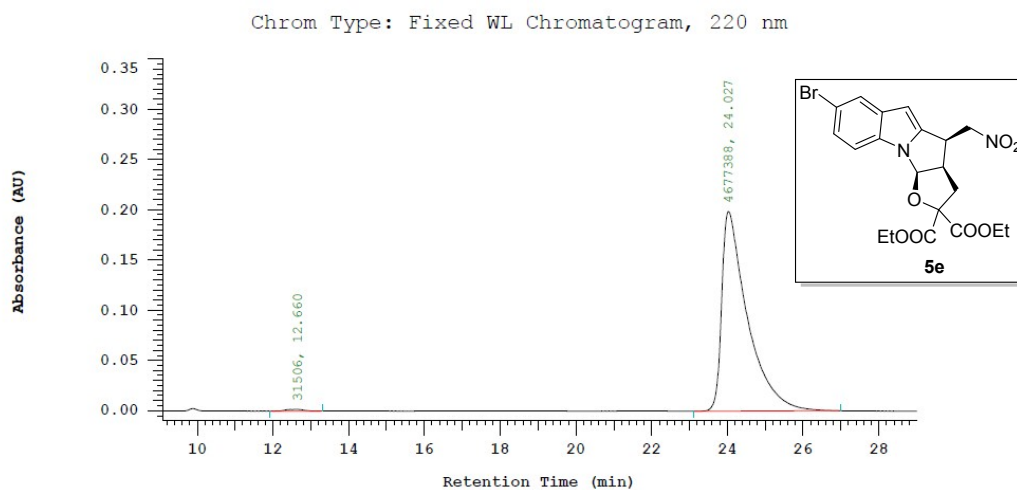

Chrom Type: Fixed WL Chromatogram, 220 nm  
 Peak Quantitation: AREA  
 Calculation Method: AREA%

| No. | RT     | Area    | Area %  | BC |
|-----|--------|---------|---------|----|
| 1   | 12.660 | 31506   | 0.669   | BB |
| 2   | 24.027 | 4677388 | 99.331  | BB |
|     |        | 4708894 | 100.000 |    |

### The <sup>1</sup>H NMR spectrum of 5f (500 MHz, CDCl<sub>3</sub>)

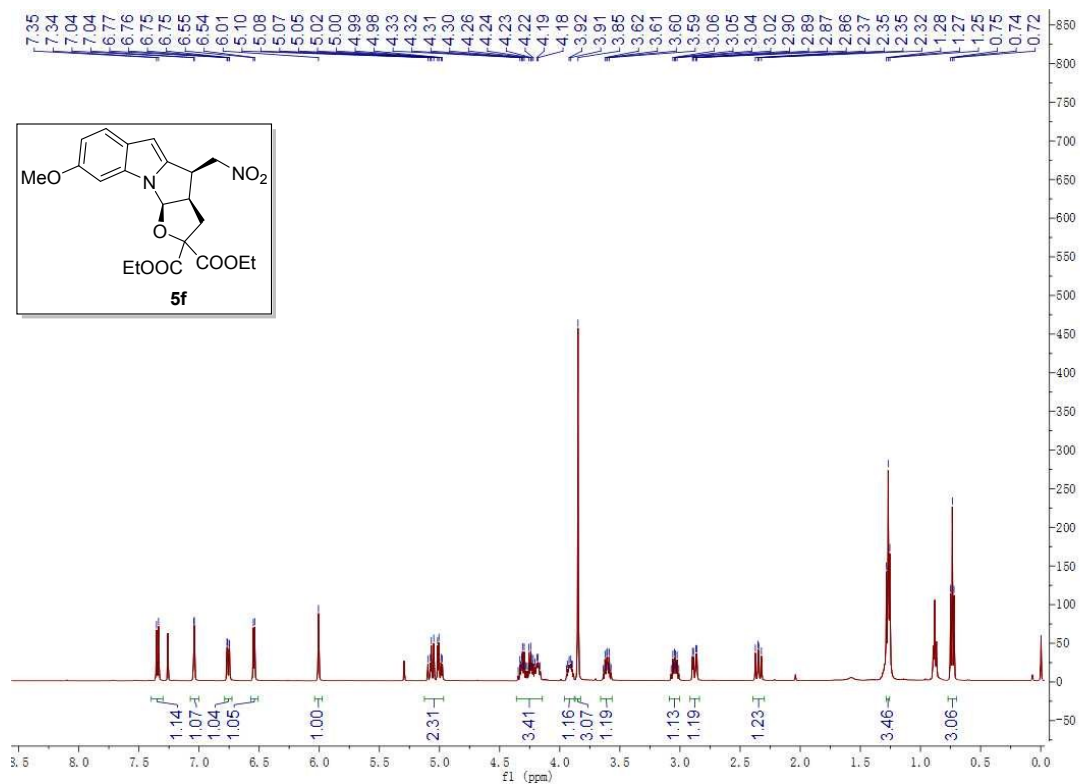

### The <sup>13</sup>C NMR spectrum of 5f (125 MHz, CDCl<sub>3</sub>)

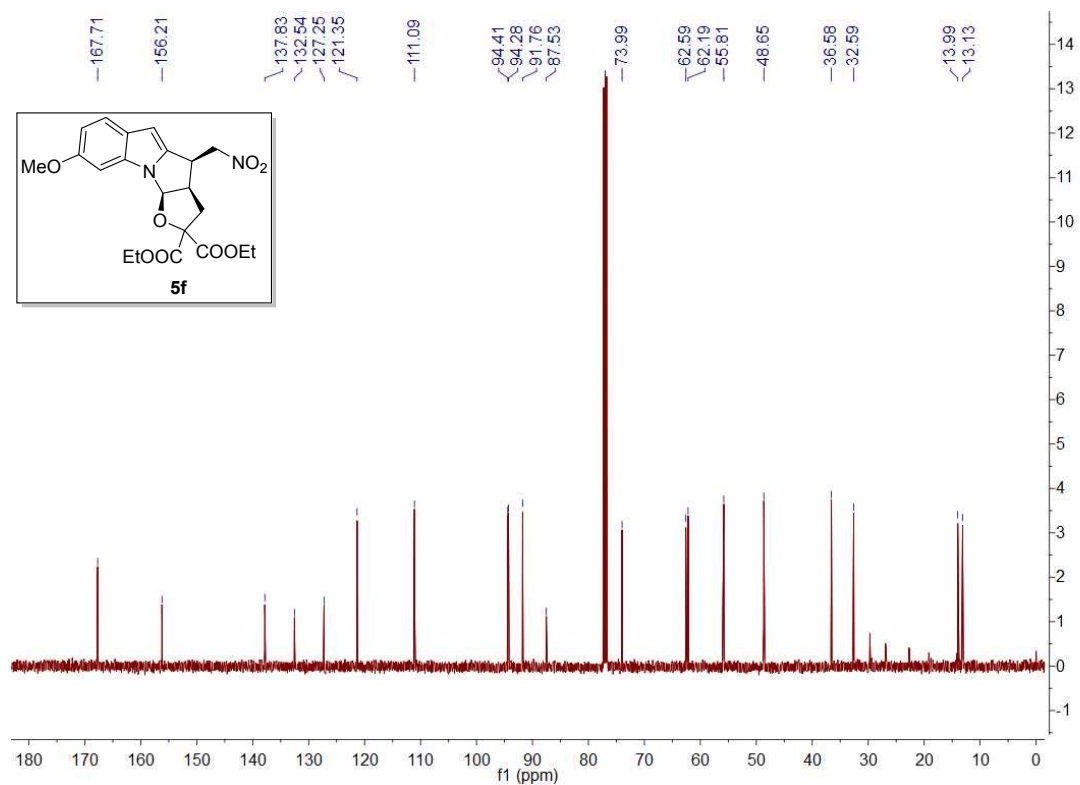

## The HPLC of racemic 5f

Chrom Type: Fixed WL Chromatogram, 220 nm

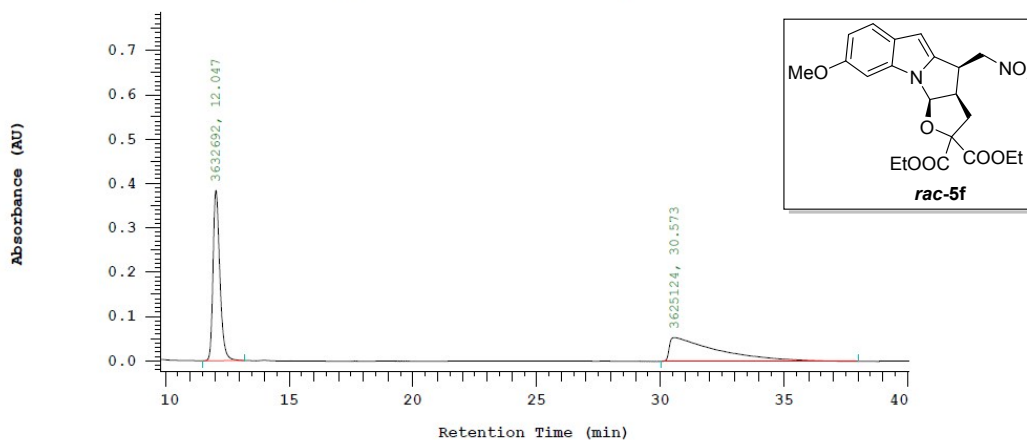

## The HPLC of chiral 5f

Chrom Type: Fixed WL Chromatogram, 220 nm

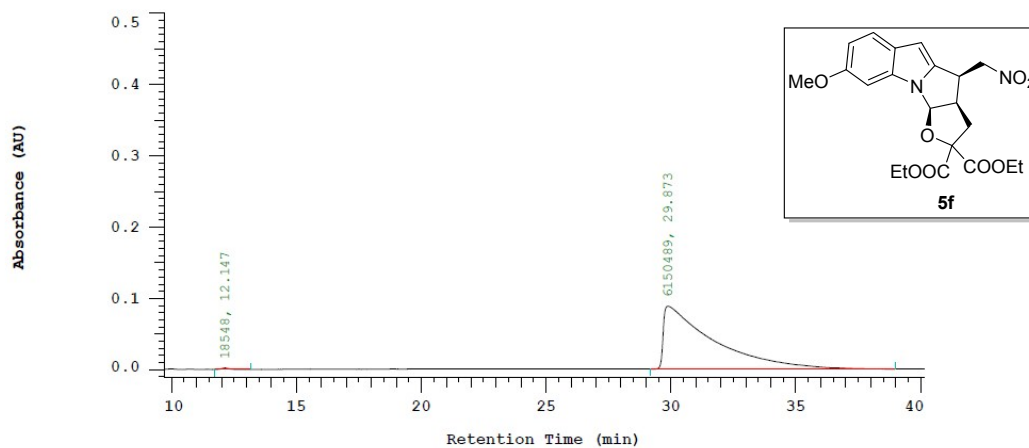

### The <sup>1</sup>H NMR spectrum of 5g (500 MHz, CDCl<sub>3</sub>)

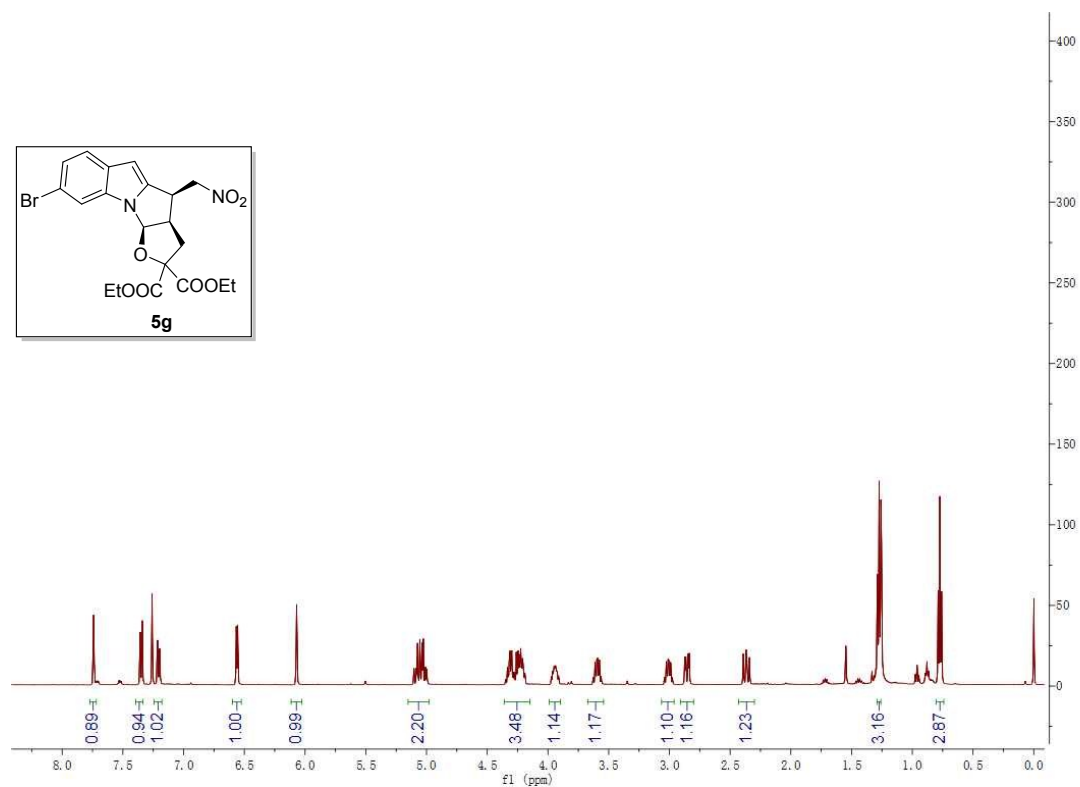

### The <sup>13</sup>C NMR spectrum of 5g (125 MHz, CDCl<sub>3</sub>)

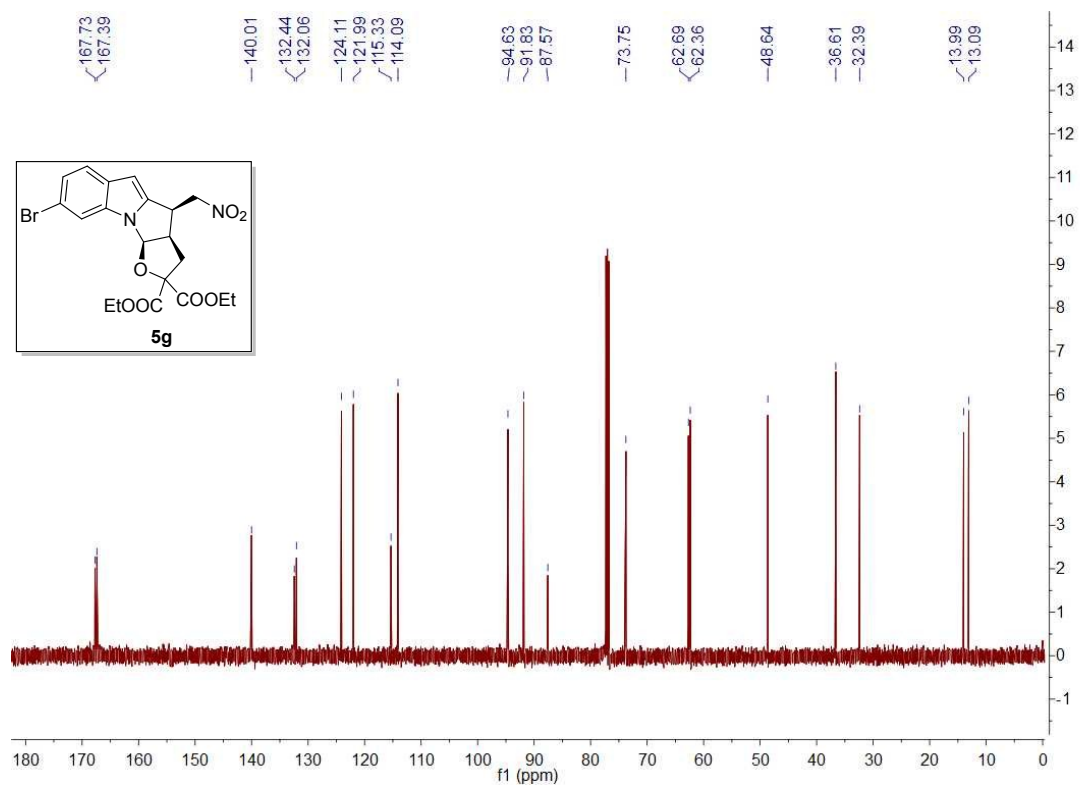

## The HPLC of racemic 5g

Chrom Type: Fixed WL Chromatogram, 220 nm

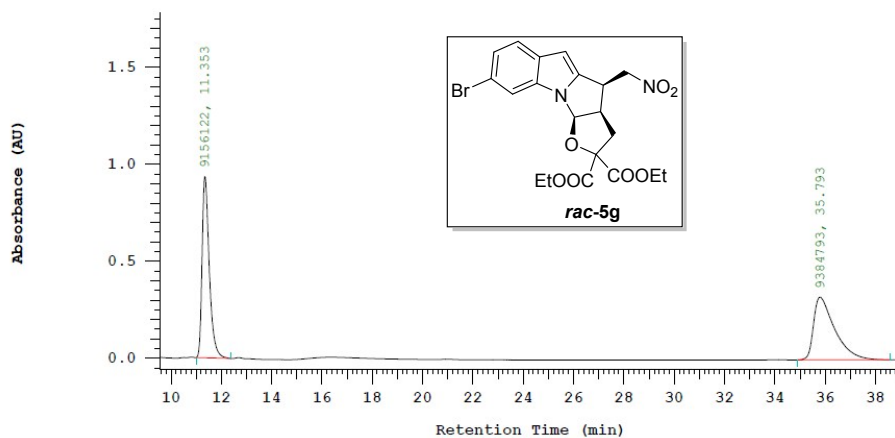

## The HPLC of chiral 5g

Chrom Type: Fixed WL Chromatogram, 220 nm

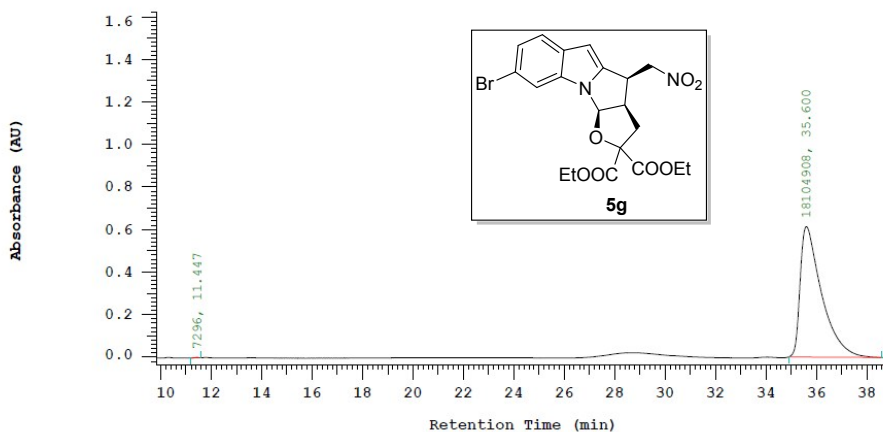

### The $^1\text{H}$ NMR spectrum of 5h (500 MHz, $\text{CDCl}_3$ )

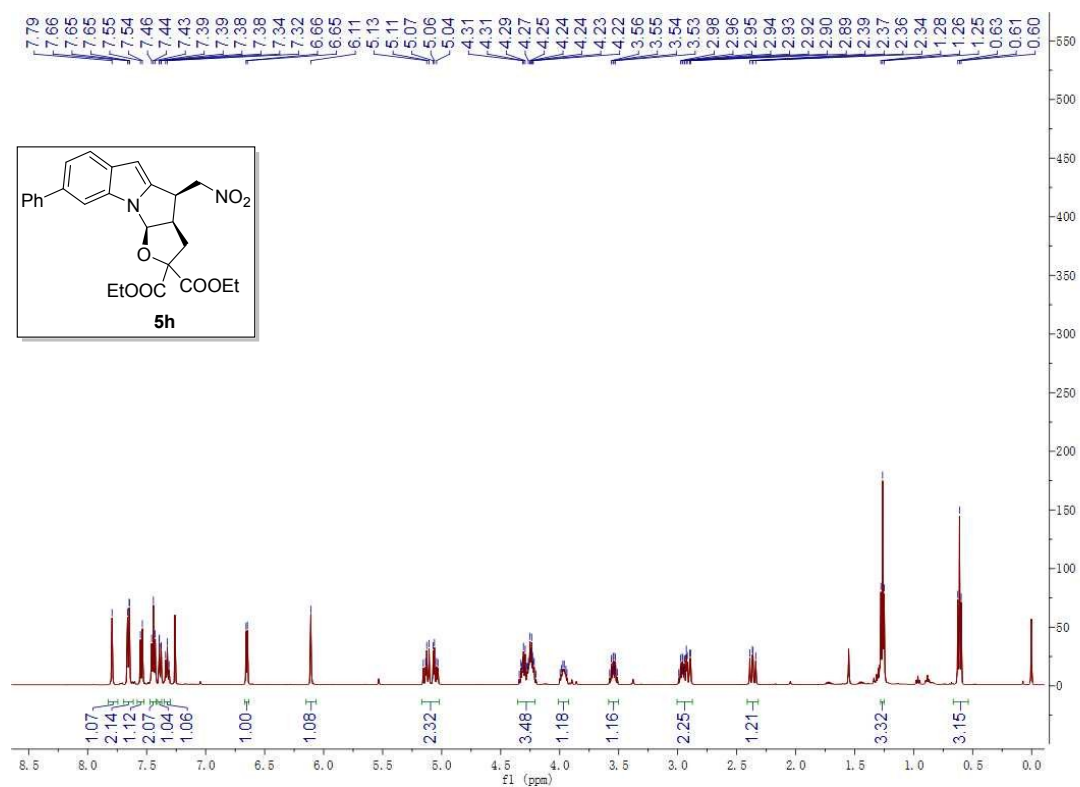

### The $^{13}\text{C}$ NMR spectrum of 5h (125 MHz, $\text{CDCl}_3$ )

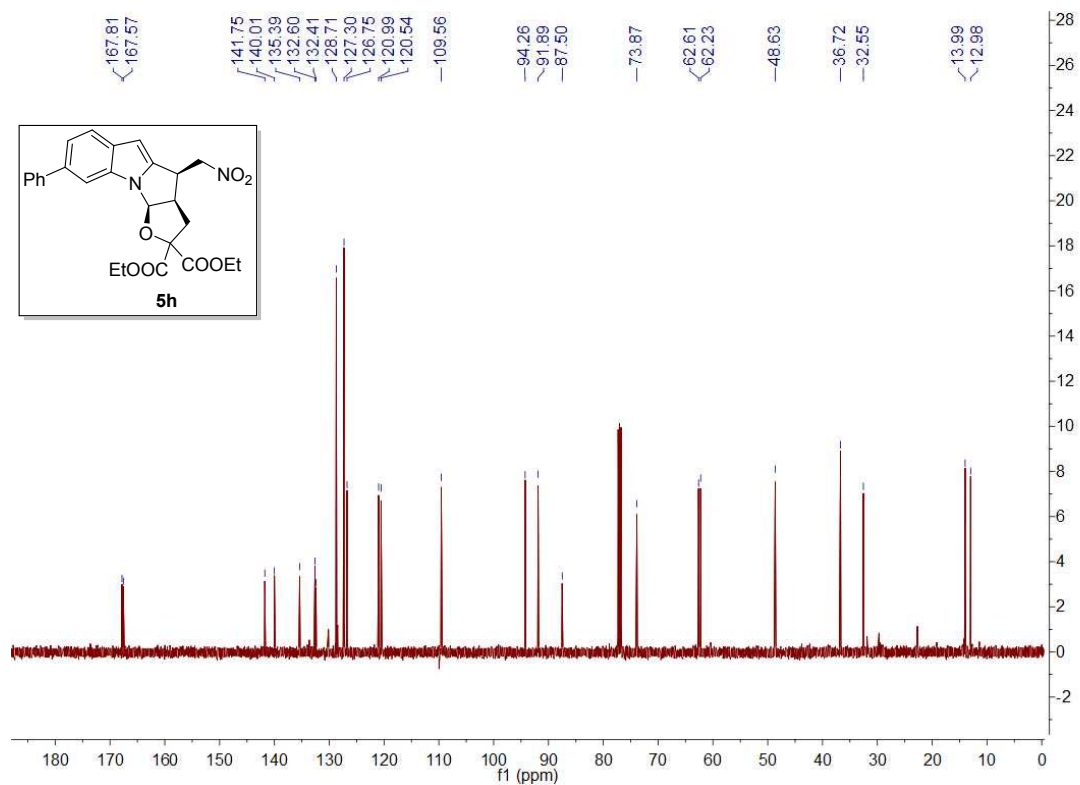

## The HPLC of racemic 5h

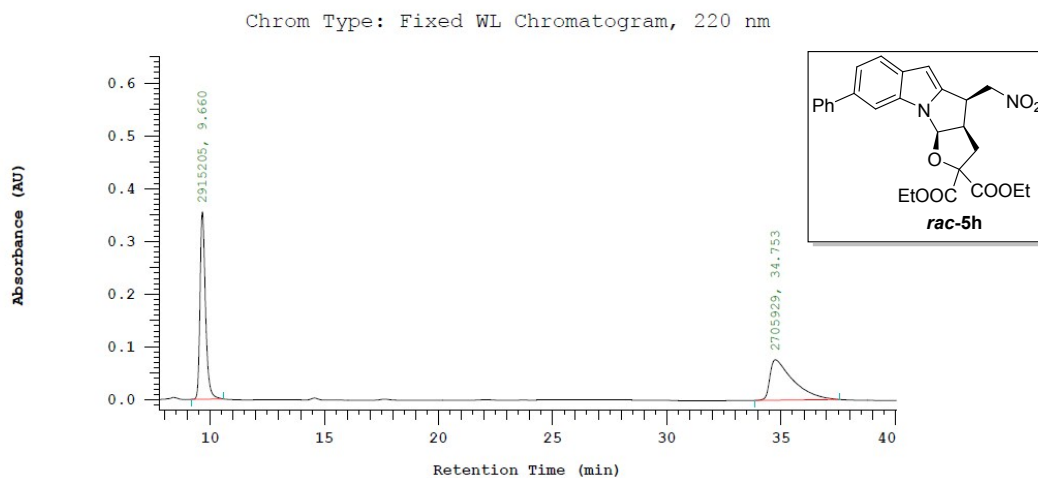

Chrom Type: Fixed WL Chromatogram, 220 nm  
Peak Quantitation: AREA  
Calculation Method: AREA%

| No. | RT     | Area    | Area %  | BC |
|-----|--------|---------|---------|----|
| 1   | 9.660  | 2915205 | 51.862  | BB |
| 2   | 34.753 | 2705929 | 48.138  | BB |
|     |        | 5621134 | 100.000 |    |

## The HPLC of chiral 5h

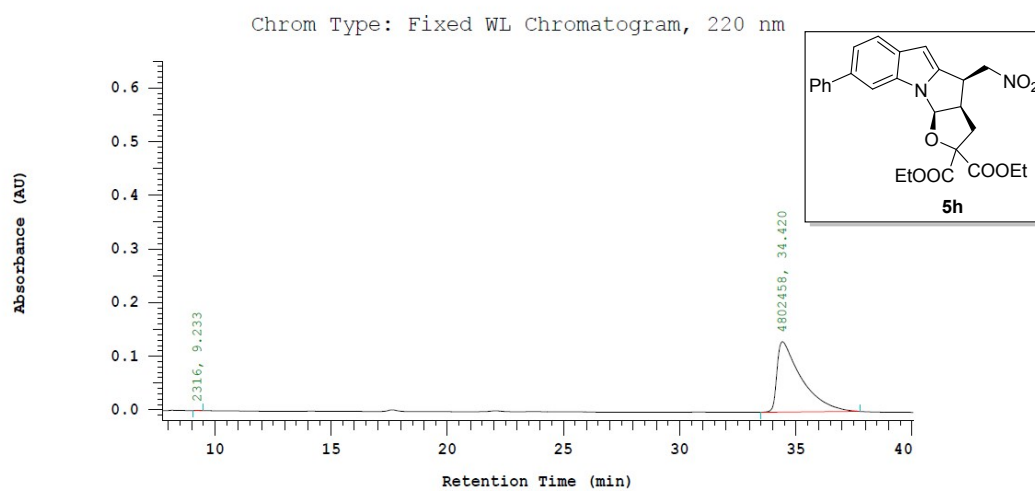

Chrom Type: Fixed WL Chromatogram, 220 nm  
Peak Quantitation: AREA  
Calculation Method: AREA%

| No. | RT     | Area    | Area %  | BC |
|-----|--------|---------|---------|----|
| 1   | 9.233  | 2316    | 0.048   | BB |
| 2   | 34.420 | 4802458 | 99.952  | BB |
|     |        | 4804774 | 100.000 |    |



### The $^1\text{H}$ NMR spectrum of **5i** (500 MHz, $\text{CDCl}_3$ )

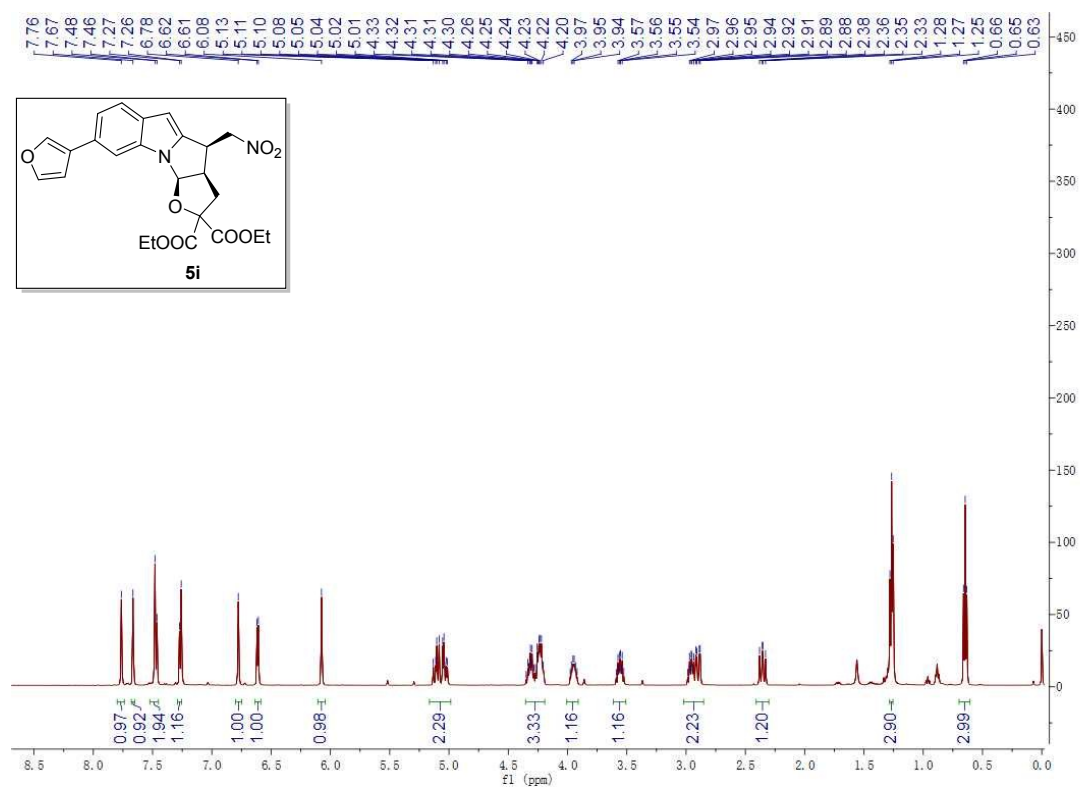

### The $^{13}\text{C}$ NMR spectrum of **5i** (125 MHz, $\text{CDCl}_3$ )

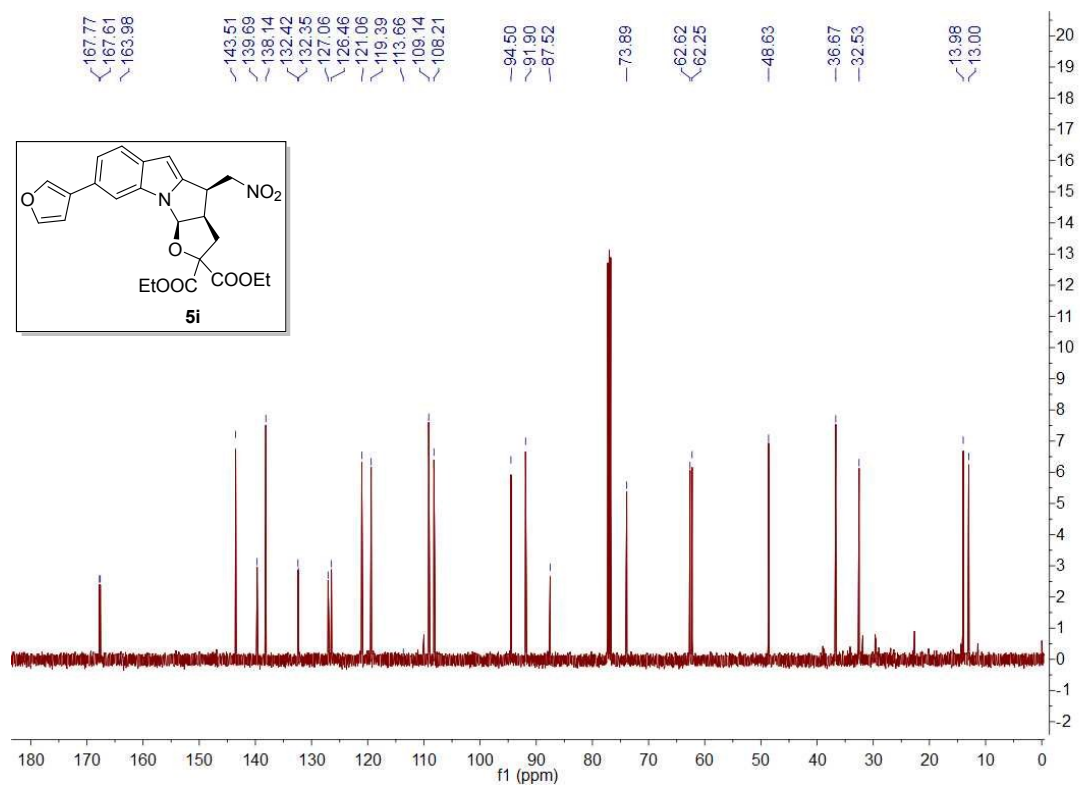

## The HPLC of racemic 5i

Chrom Type: Fixed WL Chromatogram, 220 nm

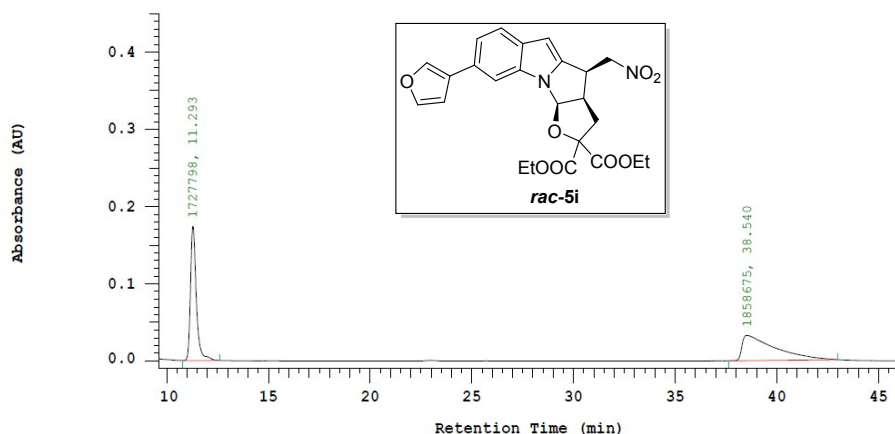

## The HPLC of chiral 5i

Chrom Type: Fixed WL Chromatogram, 220 nm

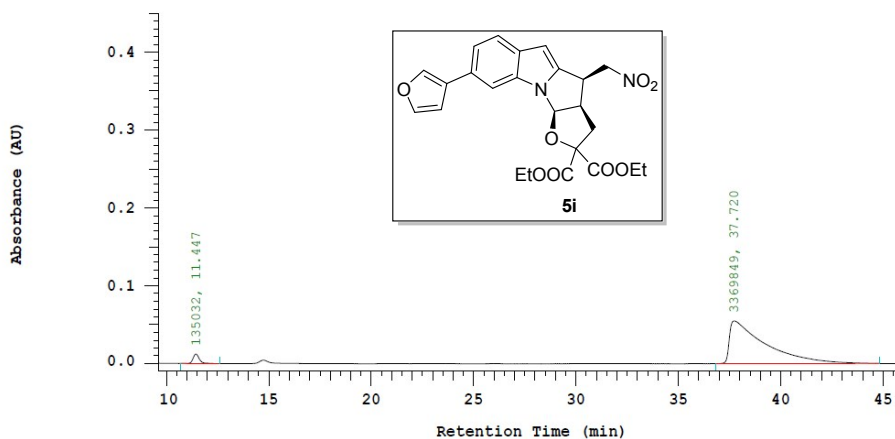

### The <sup>1</sup>H NMR spectrum of 5j (500 MHz, CDCl<sub>3</sub>)

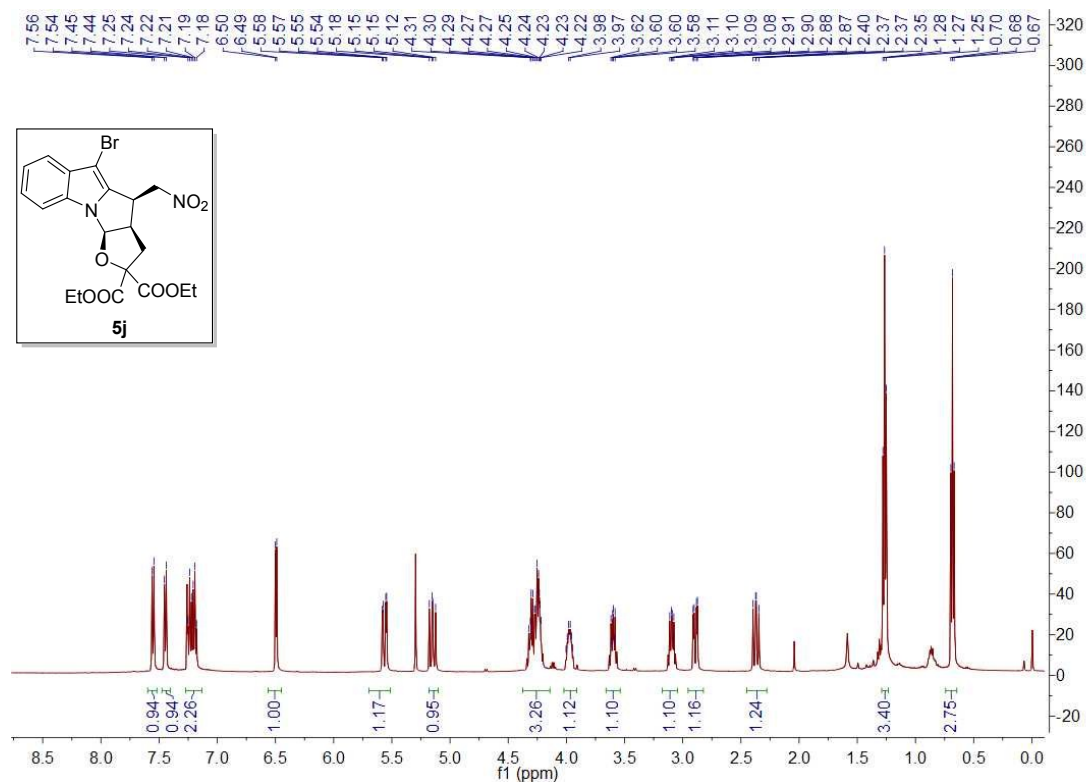

### The <sup>13</sup>C NMR spectrum of 5j (125 MHz, CDCl<sub>3</sub>)

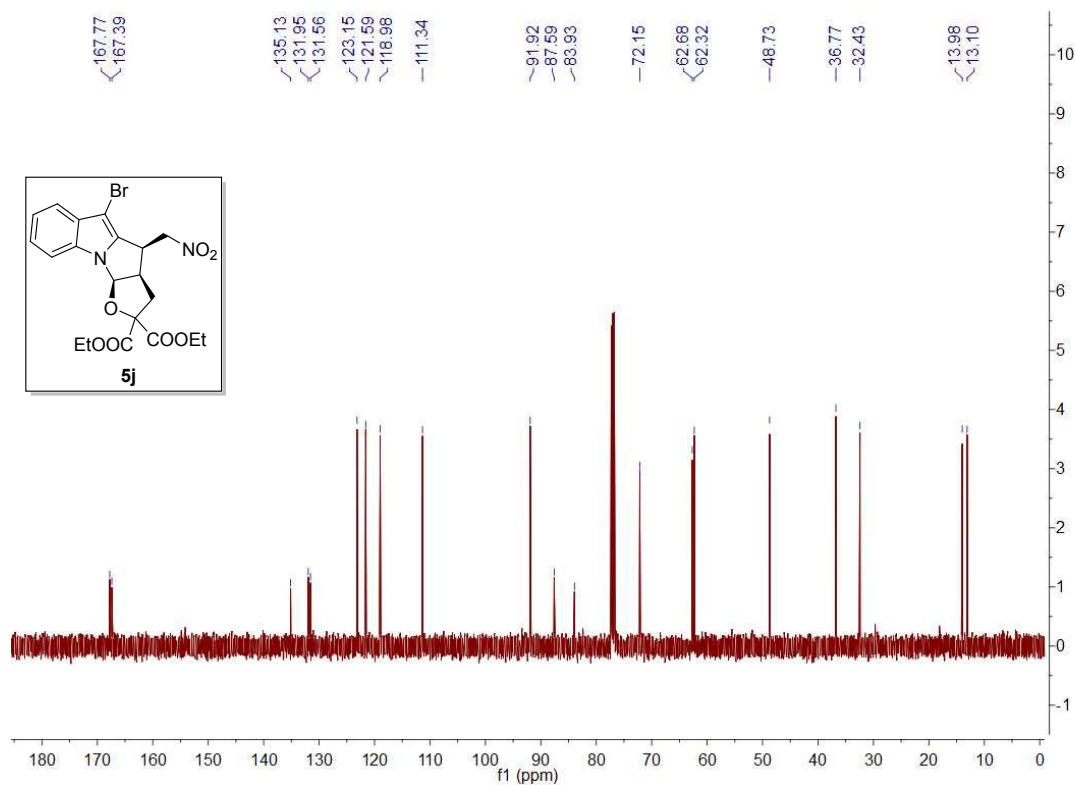

## The HPLC of racemic 5j

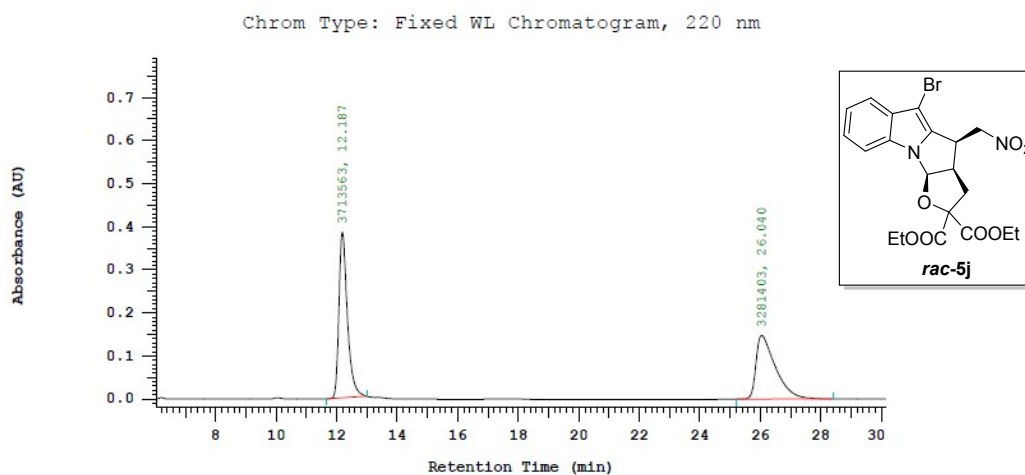

Chrom Type: Fixed WL Chromatogram, 220 nm  
 Peak Quantitation: AREA  
 Calculation Method: AREA%

| No. | RT     | Area    | Area %  | BC |
|-----|--------|---------|---------|----|
| 1   | 12.187 | 3713563 | 53.089  | BB |
| 2   | 26.040 | 3281403 | 46.911  | BB |
|     |        | 6994966 | 100.000 |    |

## The HPLC of chiral 5j

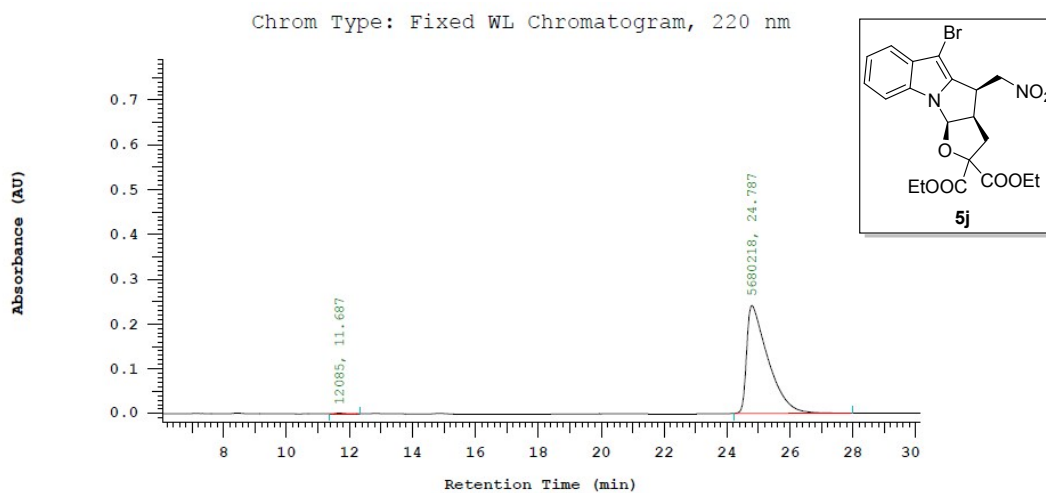

Chrom Type: Fixed WL Chromatogram, 220 nm  
 Peak Quantitation: AREA  
 Calculation Method: AREA%

| No. | RT     | Area    | Area %  | BC |
|-----|--------|---------|---------|----|
| 1   | 11.687 | 12085   | 0.212   | BB |
| 2   | 24.787 | 5680218 | 99.788  | BB |
|     |        | 5692303 | 100.000 |    |

### The <sup>1</sup>H NMR spectrum of 5k (500 MHz, CDCl<sub>3</sub>)

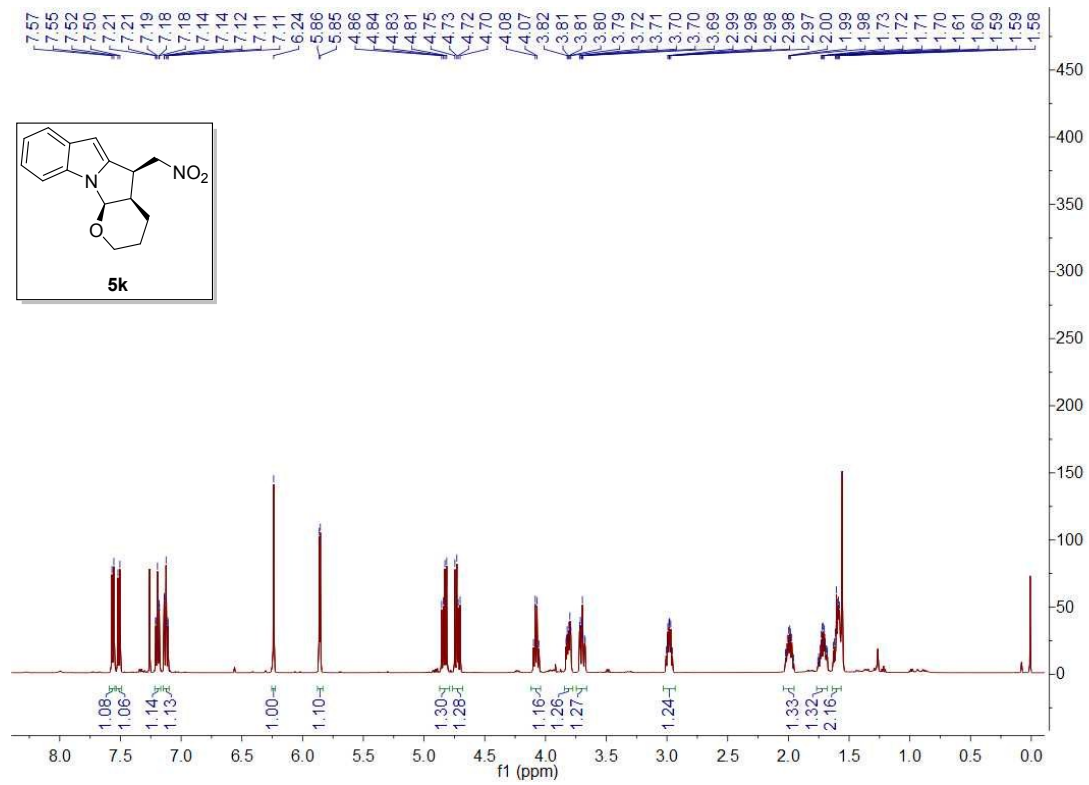

### The <sup>13</sup>C NMR spectrum of 5k (125 MHz, CDCl<sub>3</sub>)

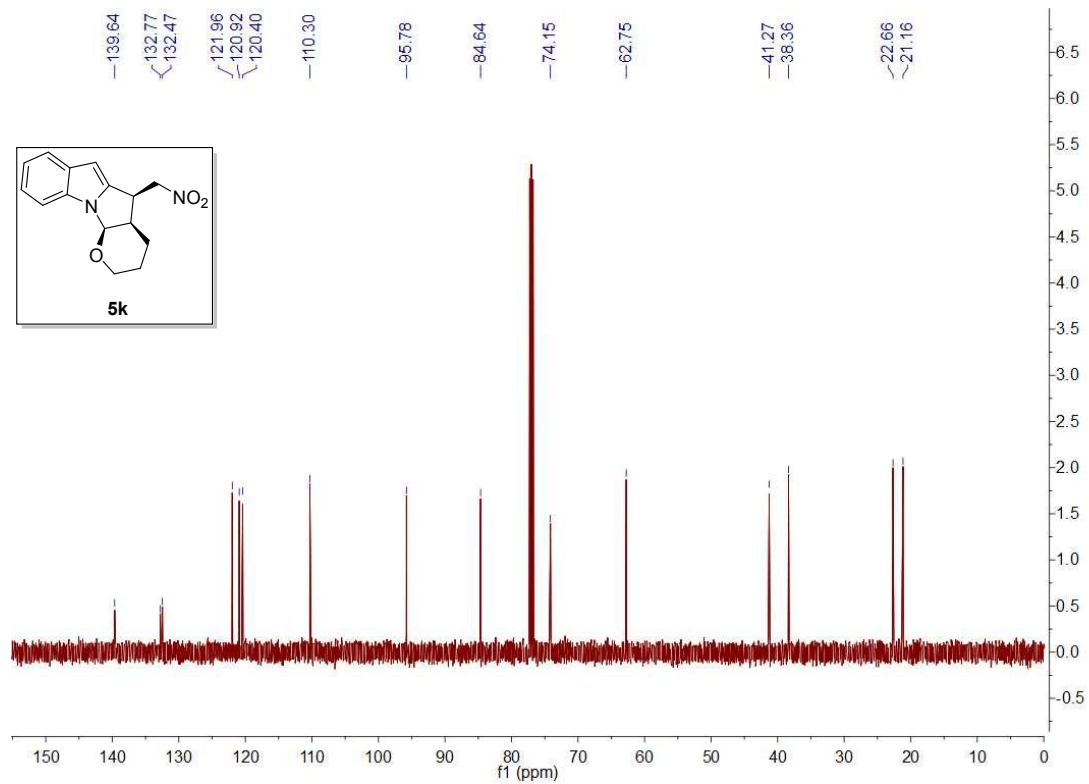

## The HPLC of racemic 5k

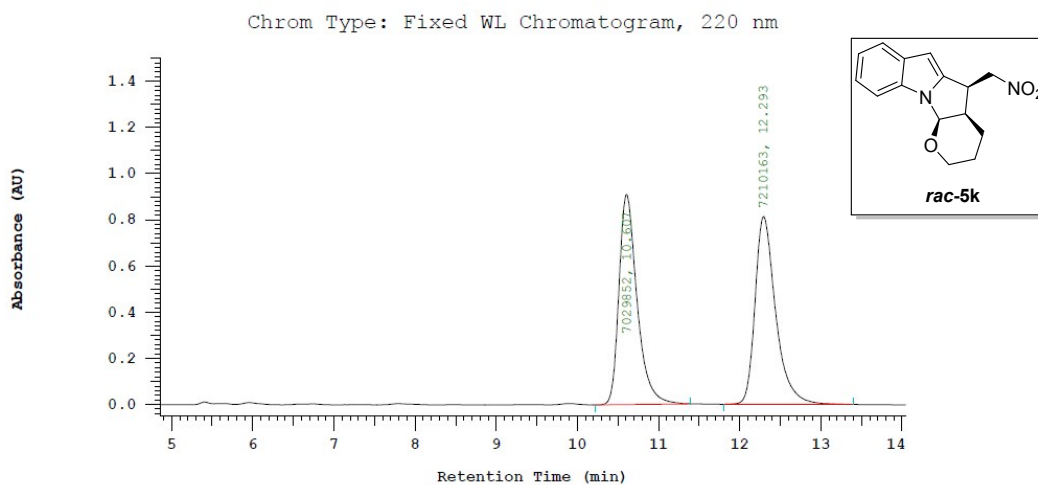

Chrom Type: Fixed WL Chromatogram, 220 nm  
 Peak Quantitation: AREA  
 Calculation Method: AREA%

| No. | RT     | Area     | Area %  | BC |
|-----|--------|----------|---------|----|
| 1   | 10.607 | 7029852  | 49.367  | BB |
| 2   | 12.293 | 7210163  | 50.633  | BB |
|     |        | 14240015 | 100.000 |    |

## The HPLC of chiral 5k

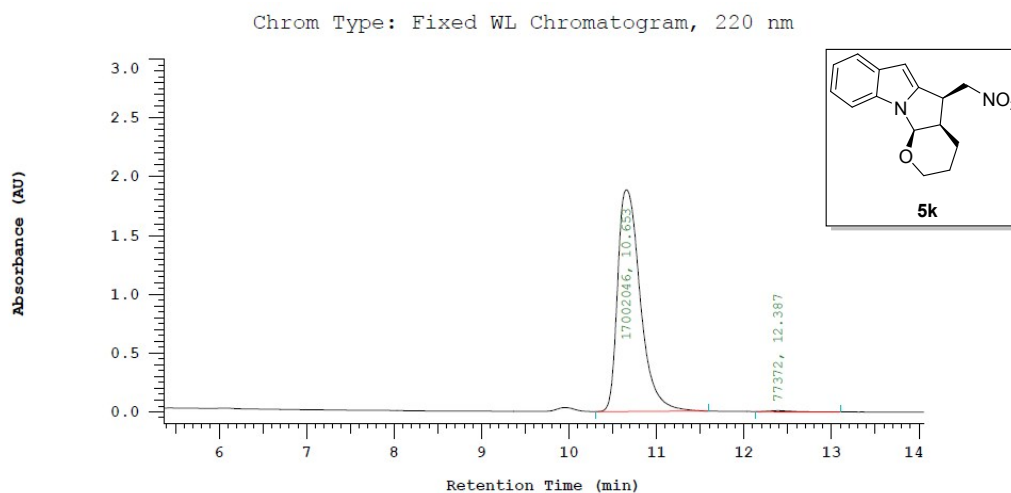

Chrom Type: Fixed WL Chromatogram, 220 nm  
 Peak Quantitation: AREA  
 Calculation Method: AREA%

| No. | RT     | Area     | Area %  | BC |
|-----|--------|----------|---------|----|
| 1   | 10.653 | 17002046 | 99.547  | BB |
| 2   | 12.387 | 77372    | 0.453   | BB |
|     |        | 17079418 | 100.000 |    |

The  $^1\text{H}$  NMR spectrum of 5I (500 MHz,  $\text{CDCl}_3$ )

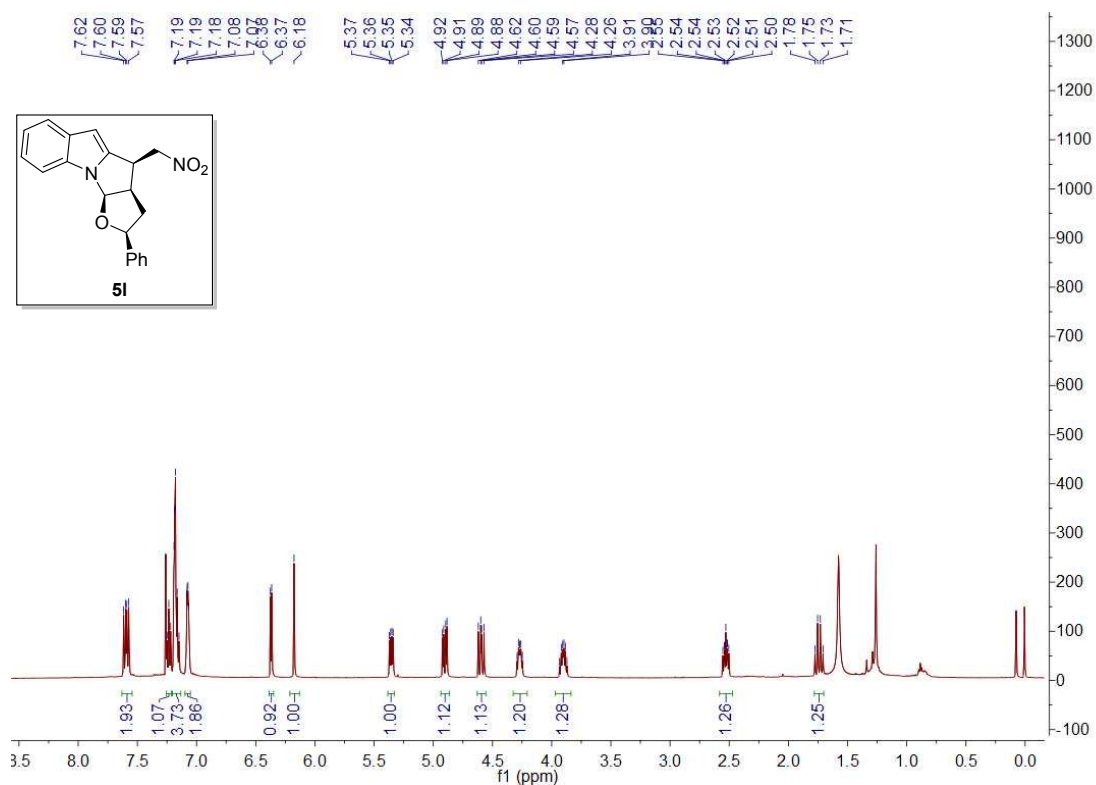

The  $^{13}\text{C}$  NMR spectrum of 5I (125 MHz,  $\text{CDCl}_3$ )

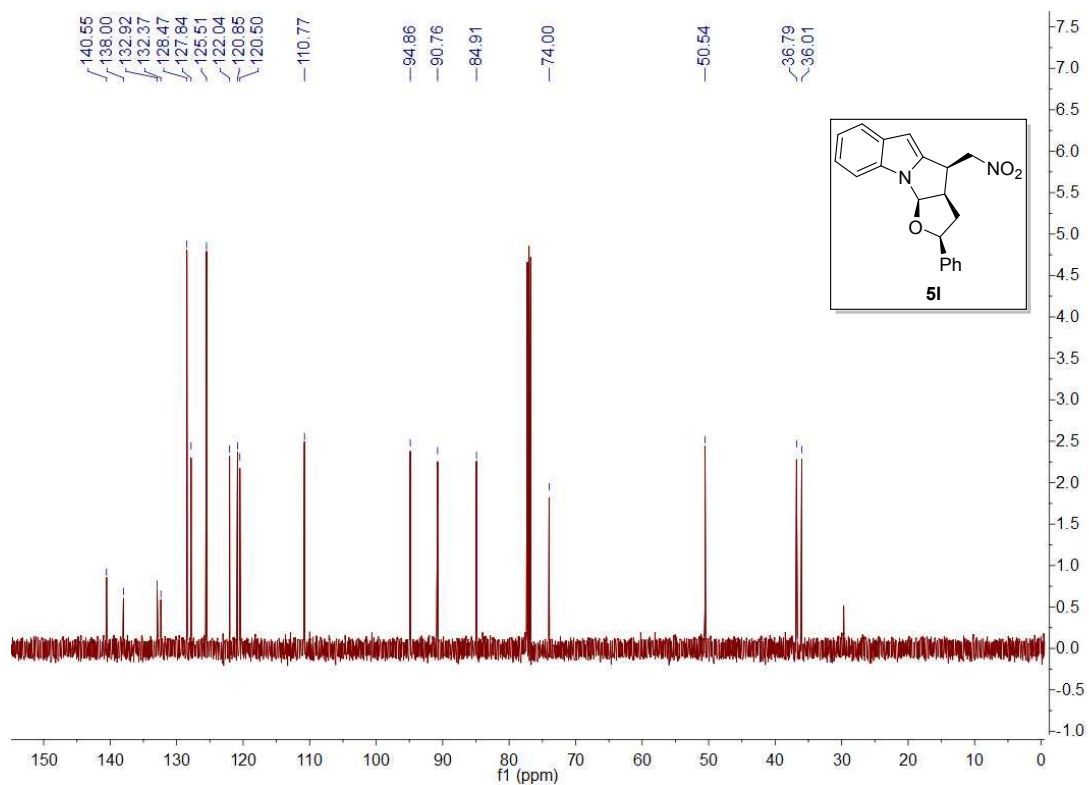



## The HPLC of racemic 5I

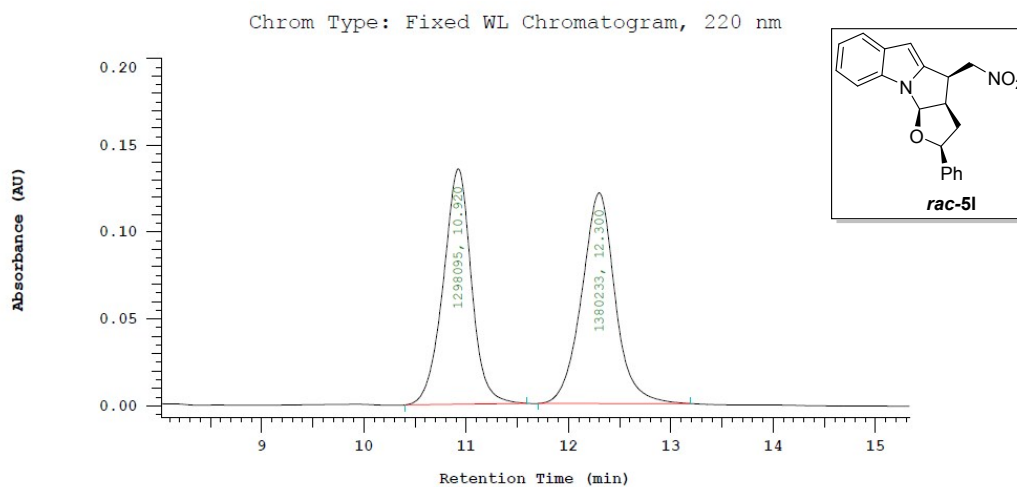

Chrom Type: Fixed WL Chromatogram, 220 nm  
 Peak Quantitation: AREA  
 Calculation Method: AREA%

| No. | RT     | Area    | Area %  | BC |
|-----|--------|---------|---------|----|
| 1   | 10.920 | 1298095 | 48.467  | BB |
| 2   | 12.300 | 1380233 | 51.533  | BB |
|     |        | 2678328 | 100.000 |    |

## The HPLC of chiral 5I

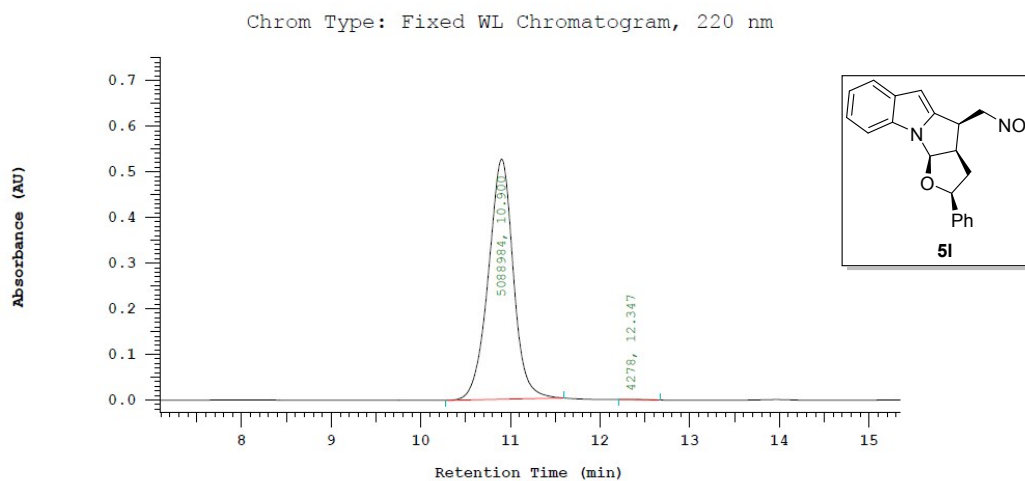

Chrom Type: Fixed WL Chromatogram, 220 nm  
 Peak Quantitation: AREA  
 Calculation Method: AREA%

| No. | RT     | Area    | Area %  | BC |
|-----|--------|---------|---------|----|
| 1   | 10.900 | 5088984 | 99.916  | BB |
| 2   | 12.347 | 4278    | 0.084   | BB |
|     |        | 5093262 | 100.000 |    |



**The <sup>1</sup>H NMR spectrum of 5m (500 MHz, CDCl<sub>3</sub>)**

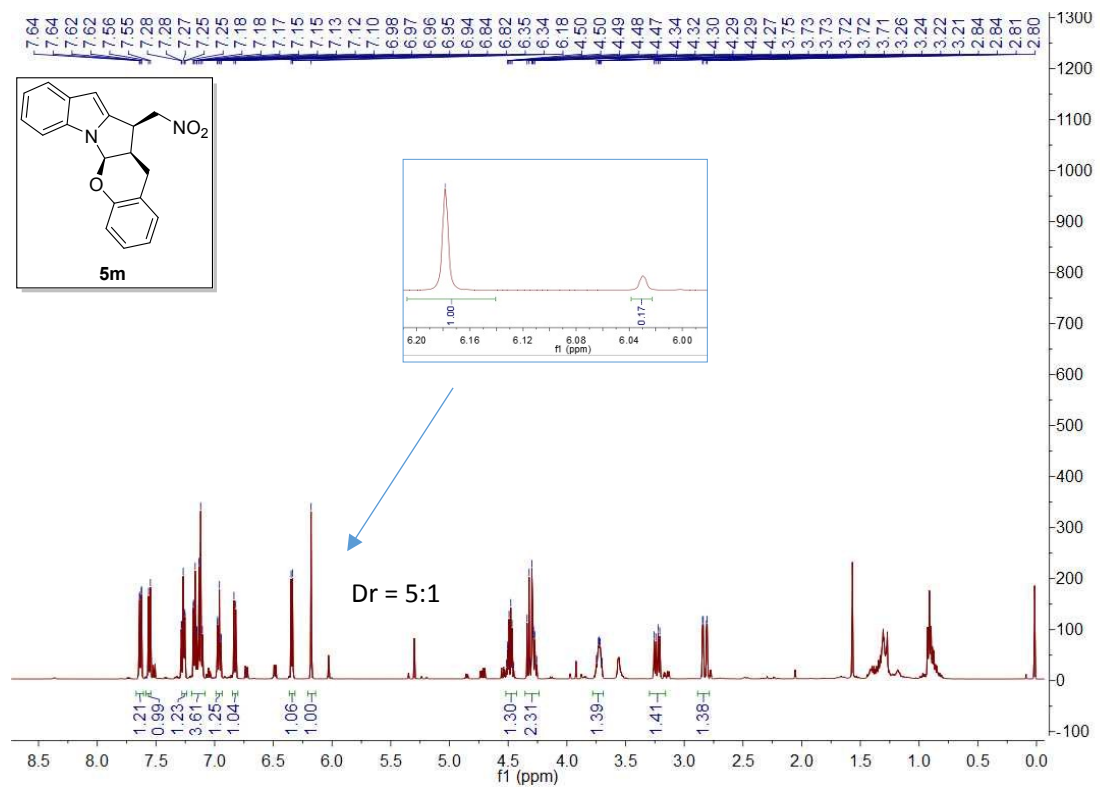

**The <sup>13</sup>C NMR spectrum of 5m (125 MHz, CDCl<sub>3</sub>)**

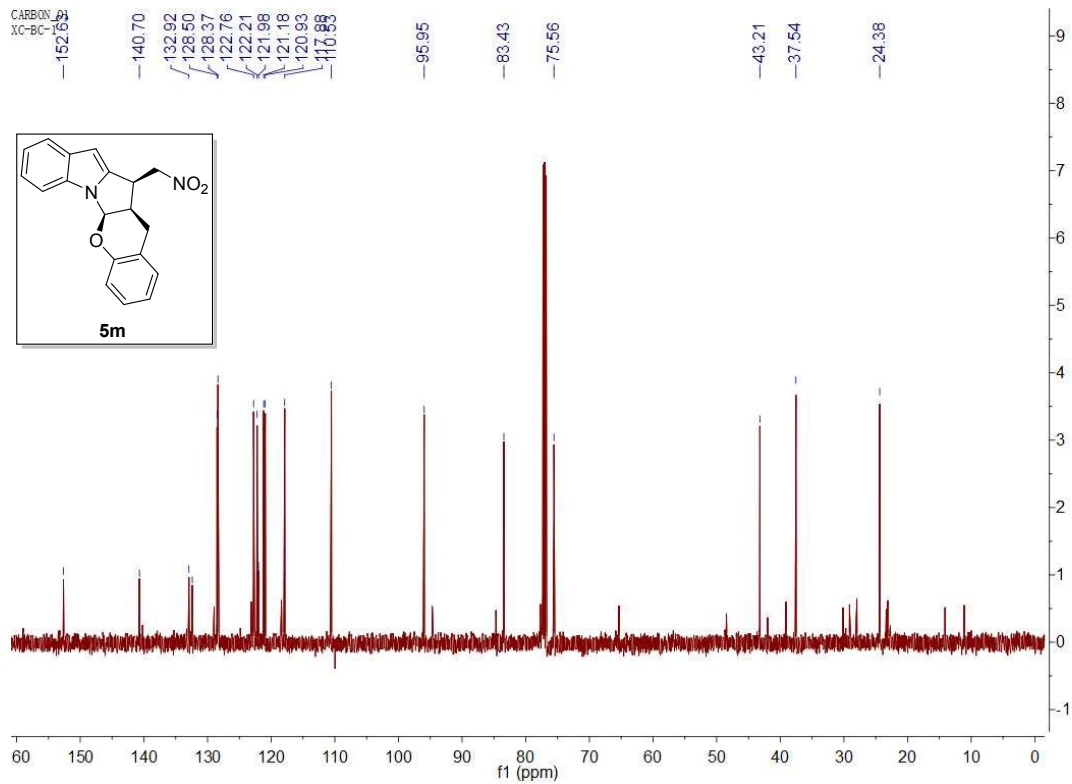

## The HPLC of racemic 5m

Chrom Type: Fixed WL Chromatogram, 220 nm

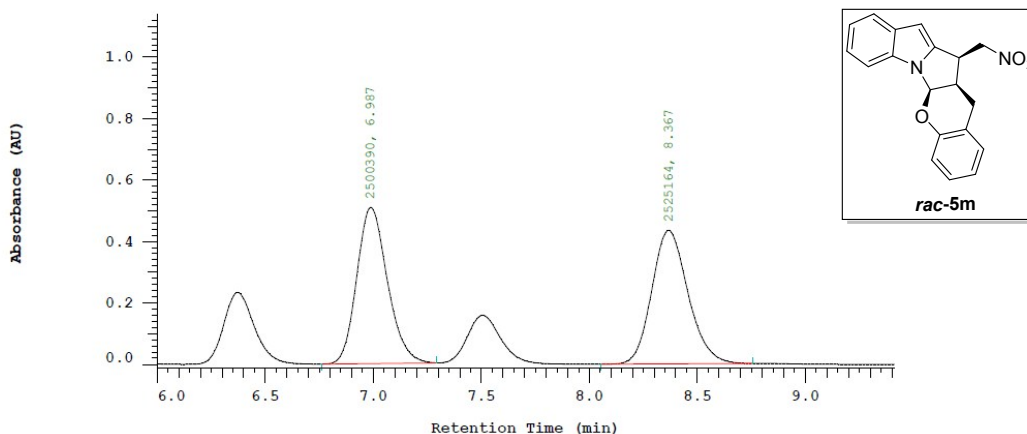

Chrom Type: Fixed WL Chromatogram, 220 nm

Peak Quantitation: AREA  
Calculation Method: AREA%

| No. | RT    | Area    | Area %  | BC |
|-----|-------|---------|---------|----|
| 1   | 6.987 | 2500390 | 49.754  | BB |
| 2   | 8.367 | 2525164 | 50.246  | BB |
|     |       | 5025554 | 100.000 |    |

## The HPLC of chiral 5m

Chrom Type: Fixed WL Chromatogram, 220 nm

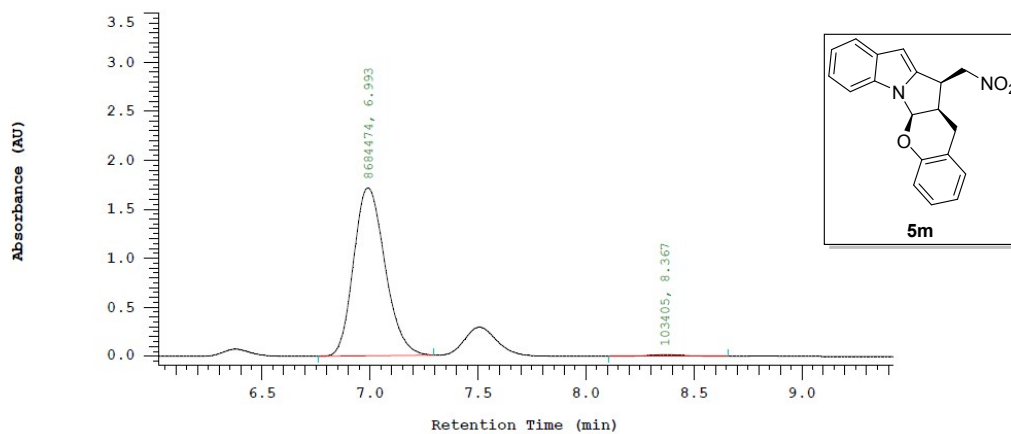

Chrom Type: Fixed WL Chromatogram, 220 nm

Peak Quantitation: AREA  
Calculation Method: AREA%

| No. | RT    | Area    | Area %  | BC |
|-----|-------|---------|---------|----|
| 1   | 6.993 | 8684474 | 98.823  | BB |
| 2   | 8.367 | 103405  | 1.177   | BB |
|     |       | 8787879 | 100.000 |    |

### The $^1\text{H}$ NMR spectrum of 5n (500 MHz, $\text{CDCl}_3$ )

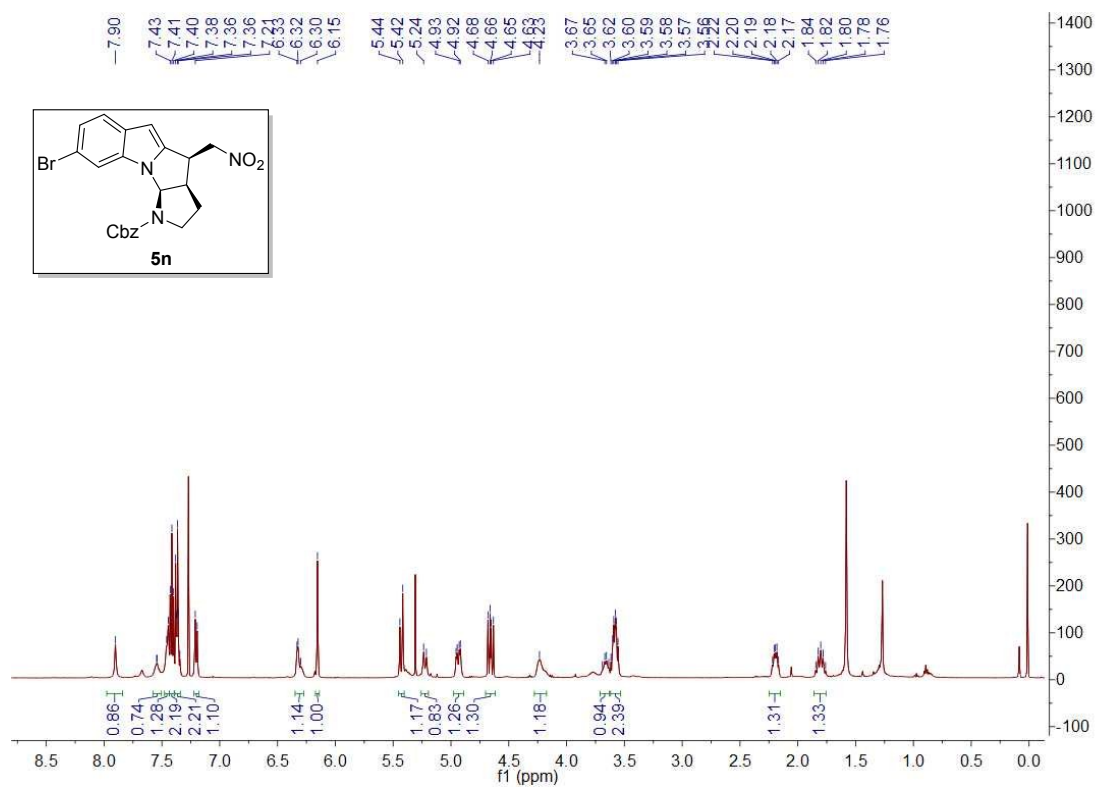

### The $^{13}\text{C}$ NMR spectrum of 5n (125 MHz, $\text{CDCl}_3$ )

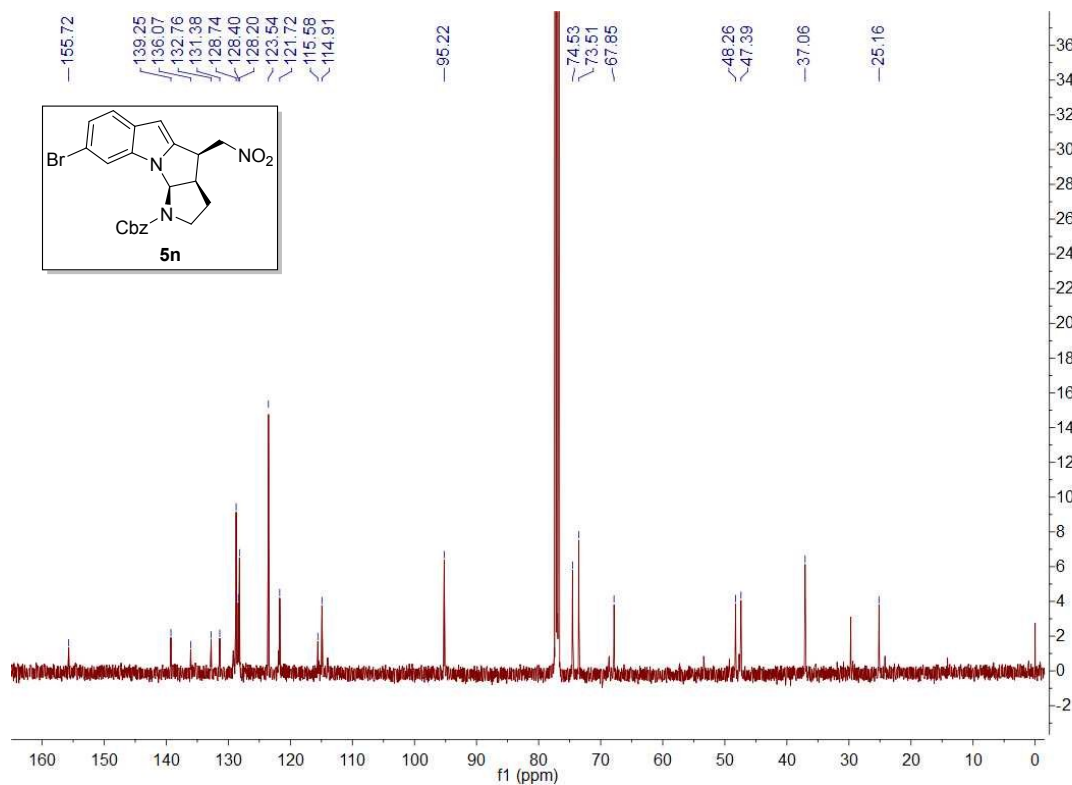

## The HPLC of racemic 5n

Chrom Type: Fixed WL Chromatogram, 220 nm

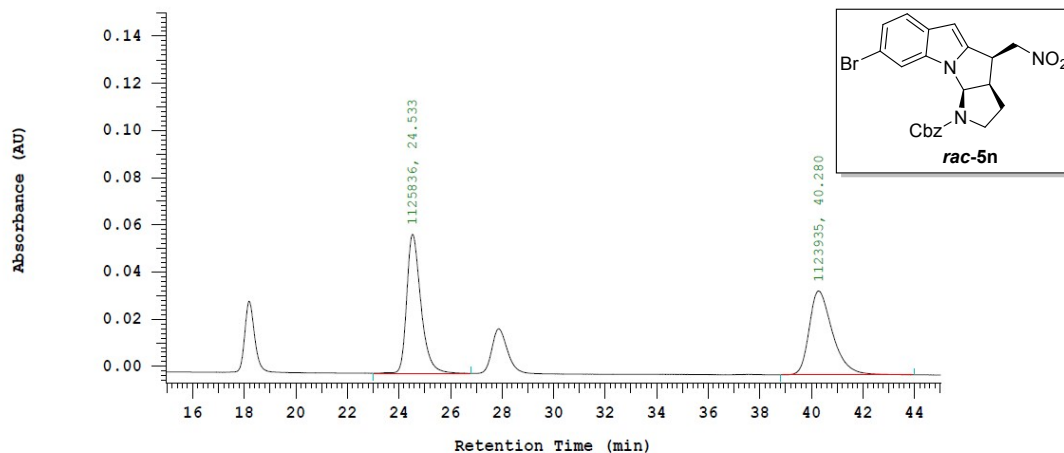

Chrom Type: Fixed WL Chromatogram, 220 nm

Peak Quantitation: AREA  
Calculation Method: AREA%

| No. | RT     | Area    | Area %  | BC |
|-----|--------|---------|---------|----|
| 1   | 24.533 | 1125836 | 50.042  | BB |
| 2   | 40.280 | 1123935 | 49.958  | BB |
|     |        | 2249771 | 100.000 |    |

## The HPLC of chiral 5n

Chrom Type: Fixed WL Chromatogram, 220 nm

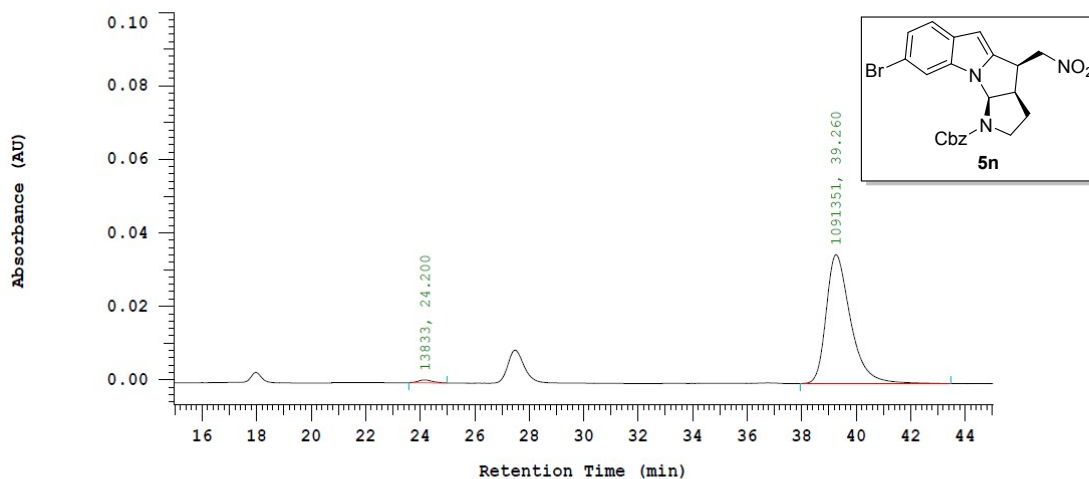

Chrom Type: Fixed WL Chromatogram, 220 nm

Peak Quantitation: AREA  
Calculation Method: AREA%

| No. | RT     | Area    | Area %  | BC |
|-----|--------|---------|---------|----|
| 1   | 24.200 | 13833   | 1.252   | BB |
| 2   | 39.260 | 1091351 | 98.748  | BB |
|     |        | 1105184 | 100.000 |    |

### The <sup>1</sup>H NMR spectrum of 6a (500 MHz, CDCl<sub>3</sub>)

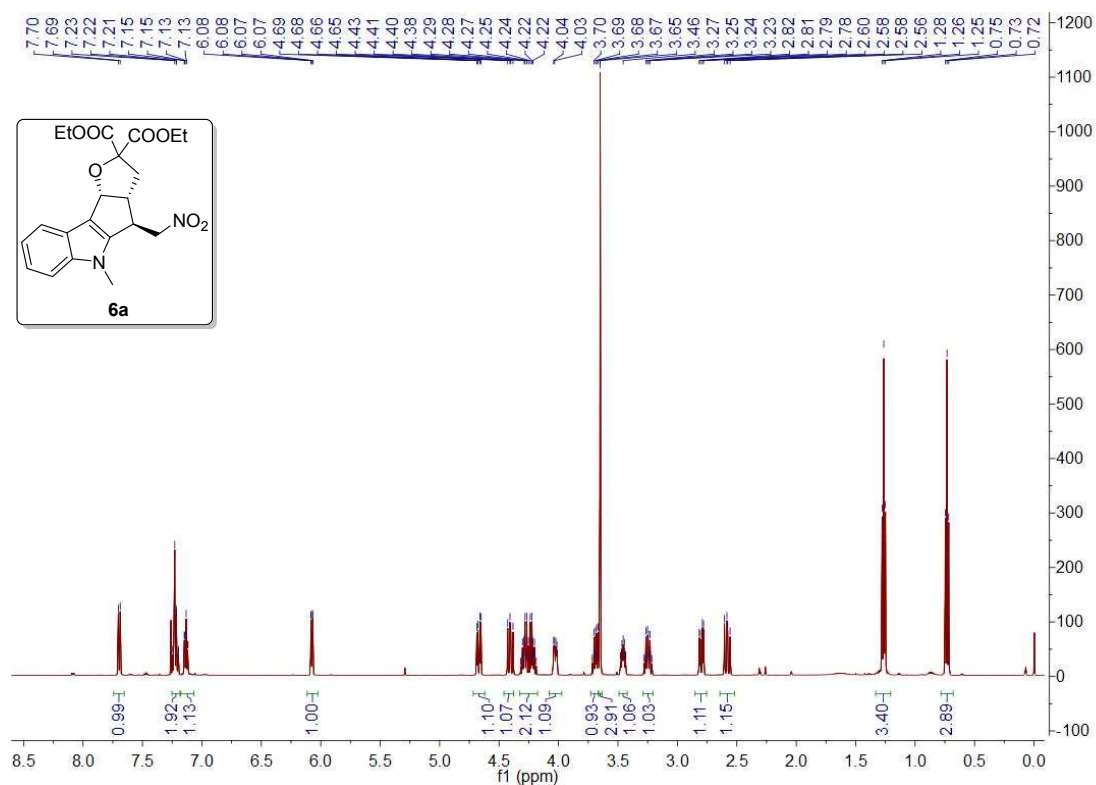

### The <sup>13</sup>C NMR spectrum of 6a (125 MHz, CDCl<sub>3</sub>)

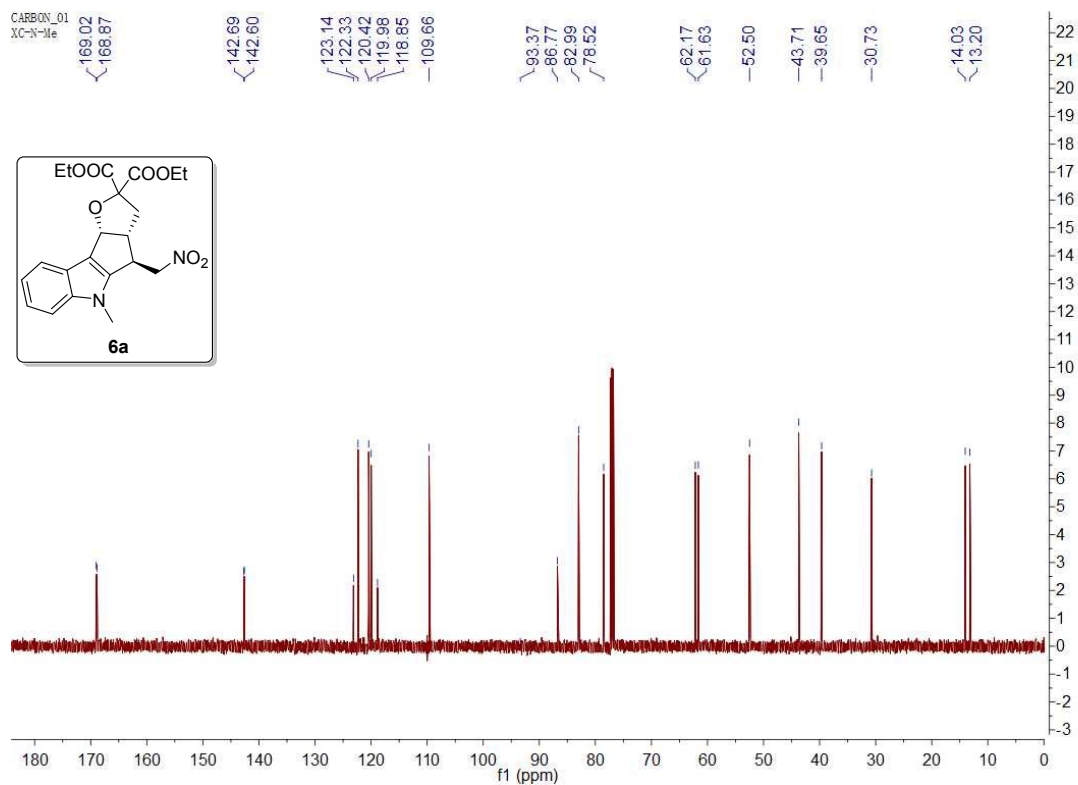

## The HPLC of racemic 6a

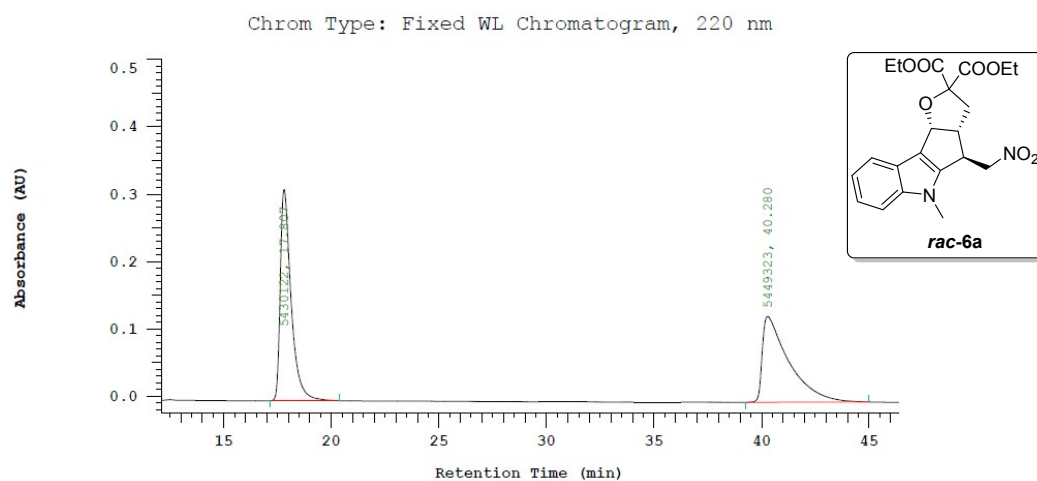

Chrom Type: Fixed WL Chromatogram, 220 nm  
Peak Quantitation: AREA  
Calculation Method: AREA%

| No. | RT     | Area     | Area %  | BC |
|-----|--------|----------|---------|----|
| 1   | 17.807 | 5430122  | 49.912  | BB |
| 2   | 40.280 | 5449323  | 50.088  | BB |
|     |        | 10879445 | 100.000 |    |

## The HPLC of chiral 6a

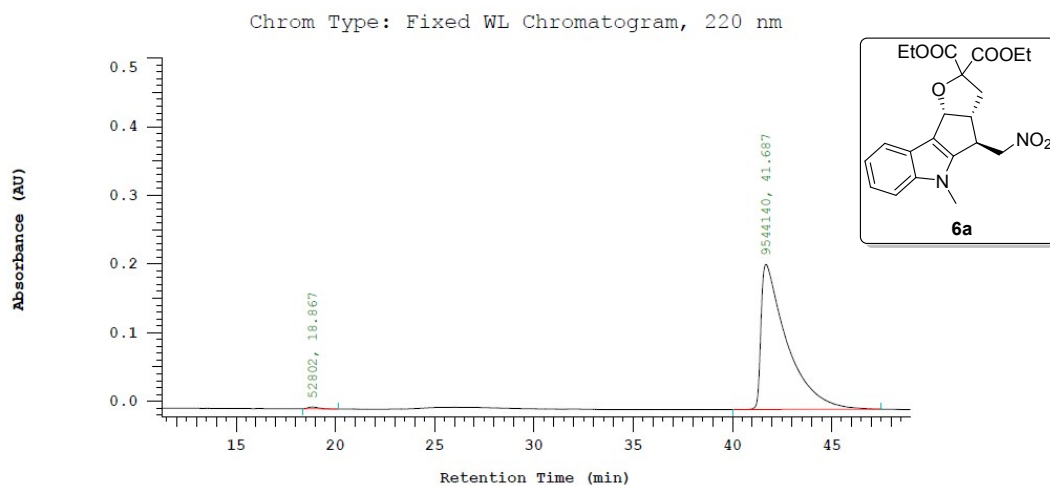

Chrom Type: Fixed WL Chromatogram, 220 nm  
Peak Quantitation: AREA  
Calculation Method: AREA%

| No. | RT     | Area    | Area %  | BC |
|-----|--------|---------|---------|----|
| 1   | 18.867 | 52802   | 0.550   | BB |
| 2   | 41.687 | 9544140 | 99.450  | BB |
|     |        | 9596942 | 100.000 |    |

### The <sup>1</sup>H NMR spectrum of 6b (500 MHz, CDCl<sub>3</sub>)

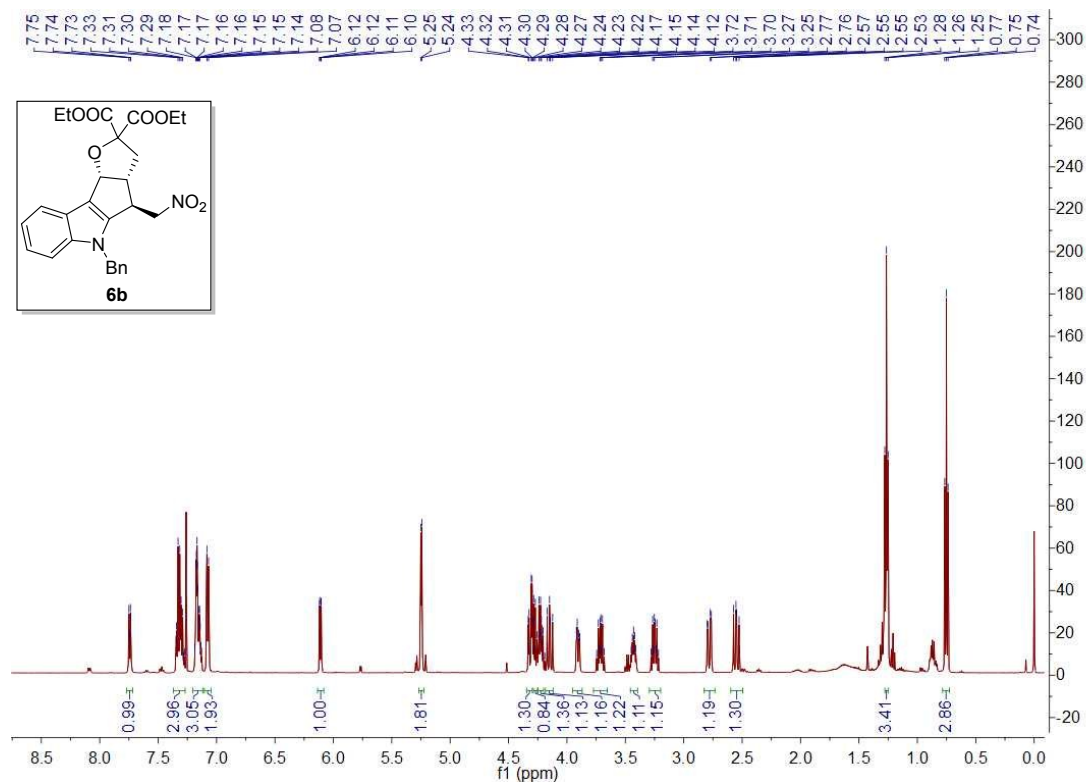

### The <sup>13</sup>C NMR spectrum of 6b (125 MHz, CDCl<sub>3</sub>)

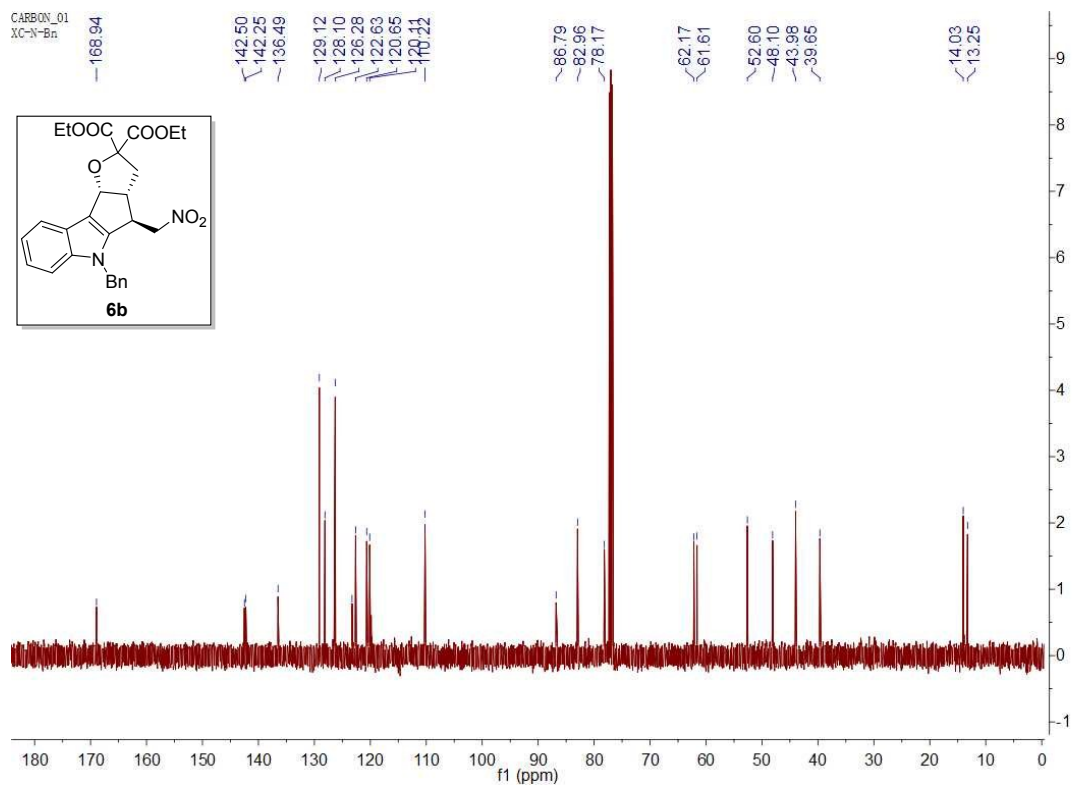



## The HPLC of racemic 6b

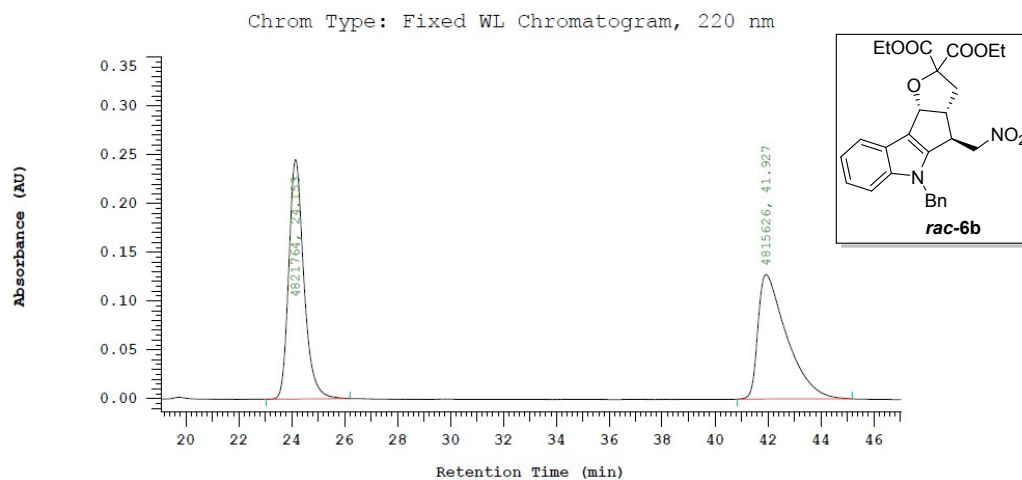

Chrom Type: Fixed WL Chromatogram, 220 nm  
 Peak Quantitation: AREA  
 Calculation Method: AREA%

| No. | RT     | Area    | Area %  | BC |
|-----|--------|---------|---------|----|
| 1   | 24.153 | 4821764 | 50.032  | BB |
| 2   | 41.927 | 4815626 | 49.968  | BB |
|     |        | 9637390 | 100.000 |    |

## The HPLC of chiral 6b

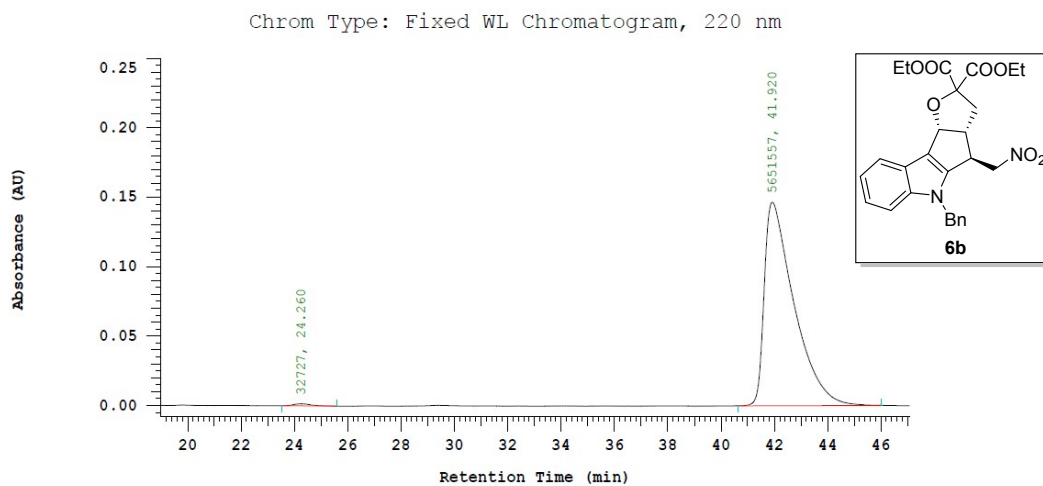

Chrom Type: Fixed WL Chromatogram, 220 nm  
 Peak Quantitation: AREA  
 Calculation Method: AREA%

| No. | RT     | Area    | Area %  | BC |
|-----|--------|---------|---------|----|
| 1   | 24.260 | 32727   | 0.576   | BB |
| 2   | 41.920 | 5651557 | 99.424  | BB |
|     |        | 5684284 | 100.000 |    |



The <sup>1</sup>H NMR spectrum of 6c (500 MHz, CDCl<sub>3</sub>)

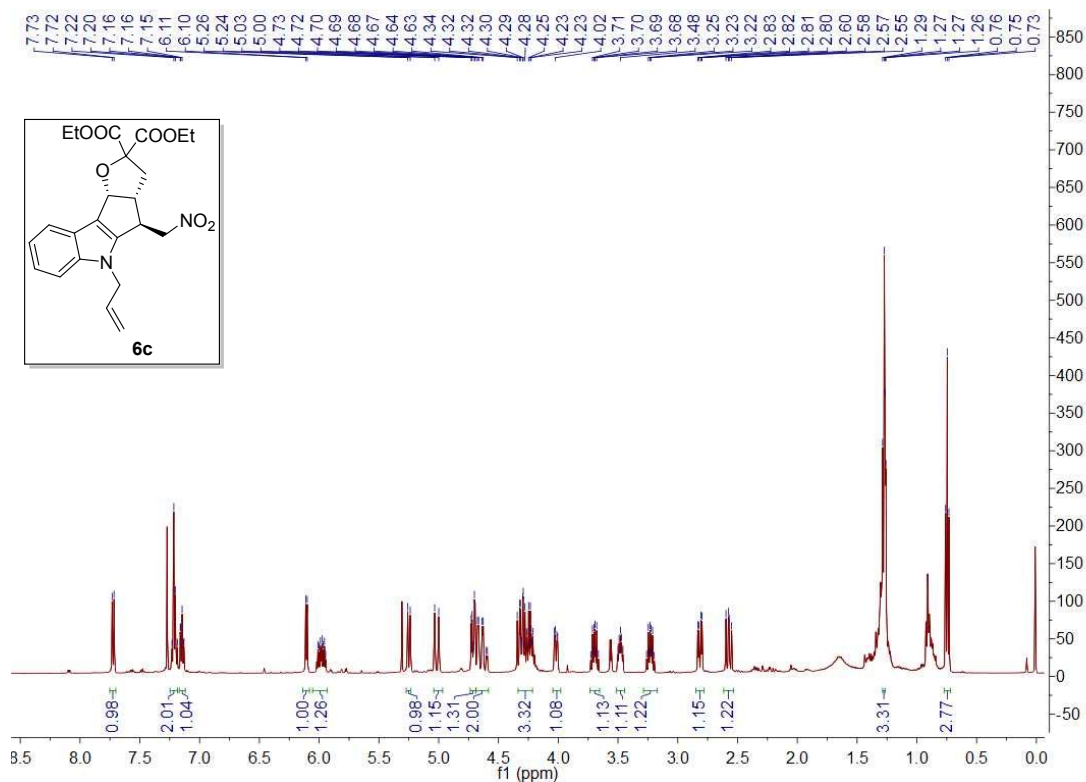

The <sup>13</sup>C NMR spectrum of 6c (125 MHz, CDCl<sub>3</sub>)

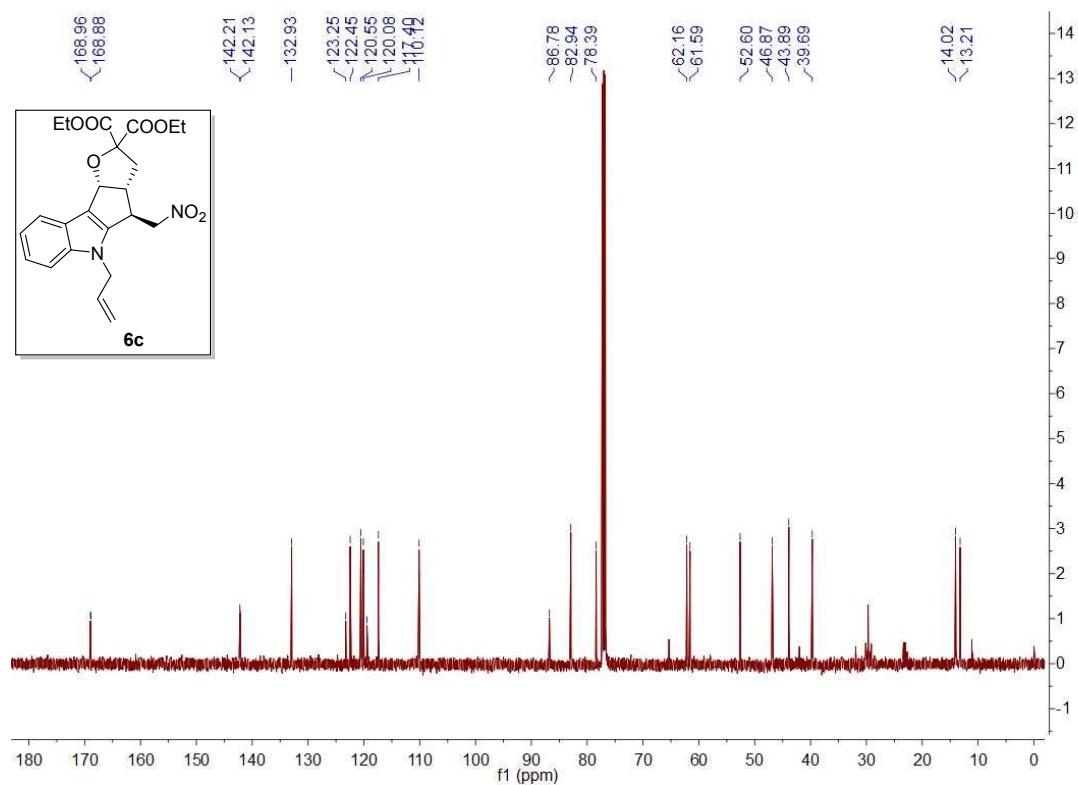

## The HPLC of racemic 6c

Chrom Type: Fixed WL Chromatogram, 230 nm

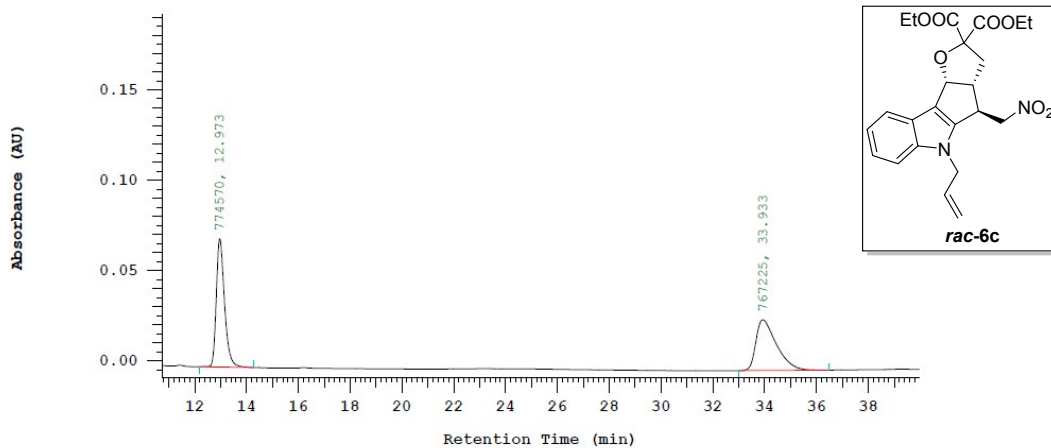

Chrom Type: Fixed WL Chromatogram, 230 nm

Peak Quantitation: AREA  
Calculation Method: AREA%

| No. | RT     | Area    | Area %  | BC |
|-----|--------|---------|---------|----|
| 1   | 12.973 | 774570  | 50.238  | BB |
| 2   | 33.933 | 767225  | 49.762  | BB |
|     |        | 1541795 | 100.000 |    |

## The HPLC of chiral 6c

Chrom Type: Fixed WL Chromatogram, 230 nm

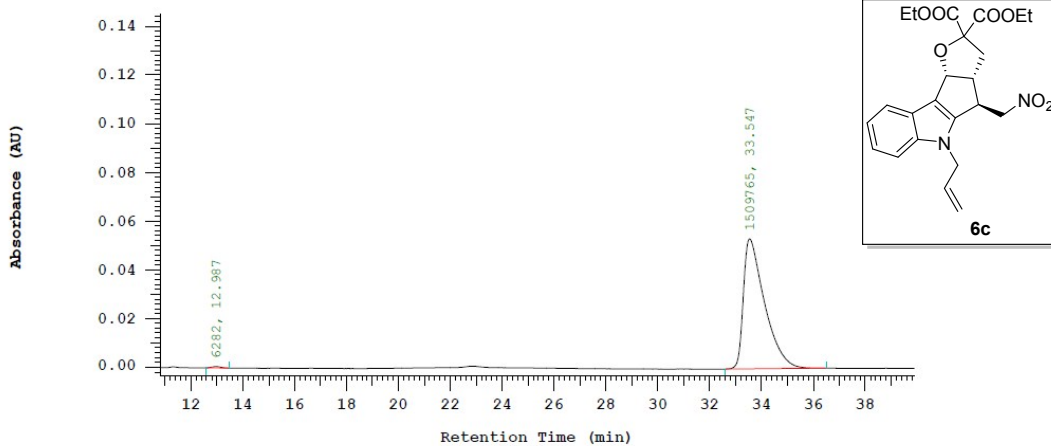

Chrom Type: Fixed WL Chromatogram, 230 nm

Peak Quantitation: AREA  
Calculation Method: AREA%

| No. | RT     | Area    | Area %  | BC |
|-----|--------|---------|---------|----|
| 1   | 12.987 | 6282    | 0.414   | BB |
| 2   | 33.547 | 1509765 | 99.586  | BB |
|     |        | 1516047 | 100.000 |    |

### The <sup>1</sup>H NMR spectrum of 8a (500 MHz, CDCl<sub>3</sub>)

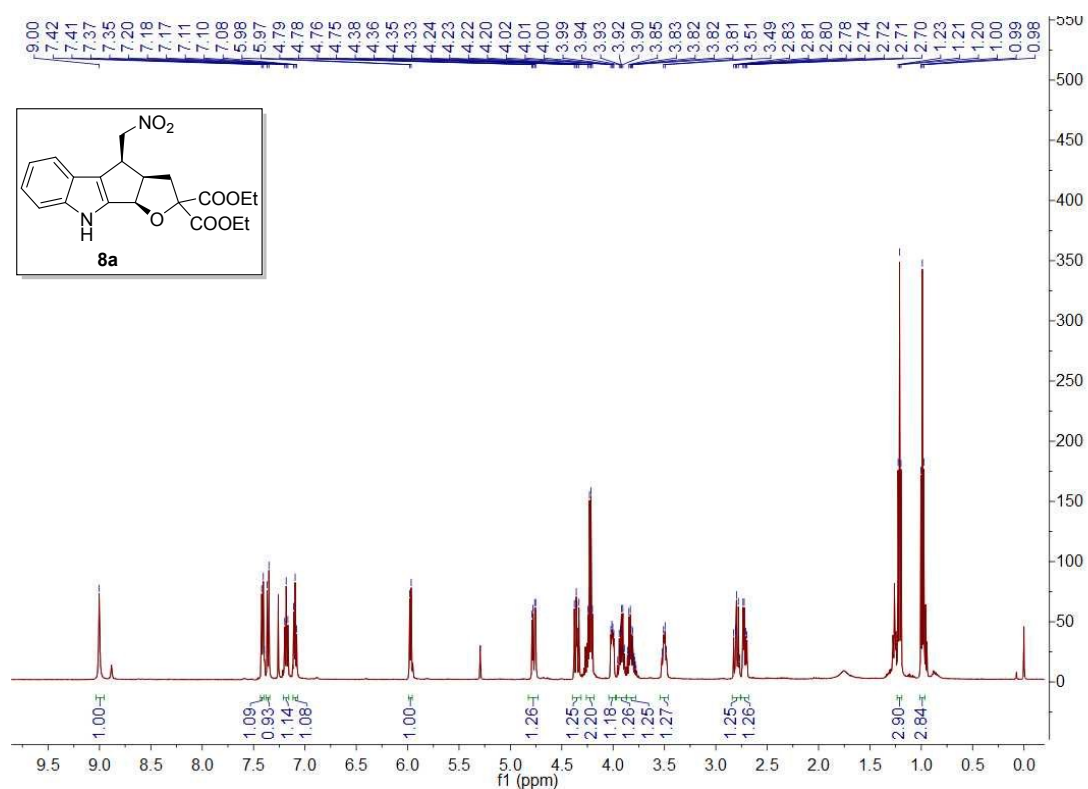

### The <sup>13</sup>C NMR spectrum of 8a (125 MHz, CDCl<sub>3</sub>)

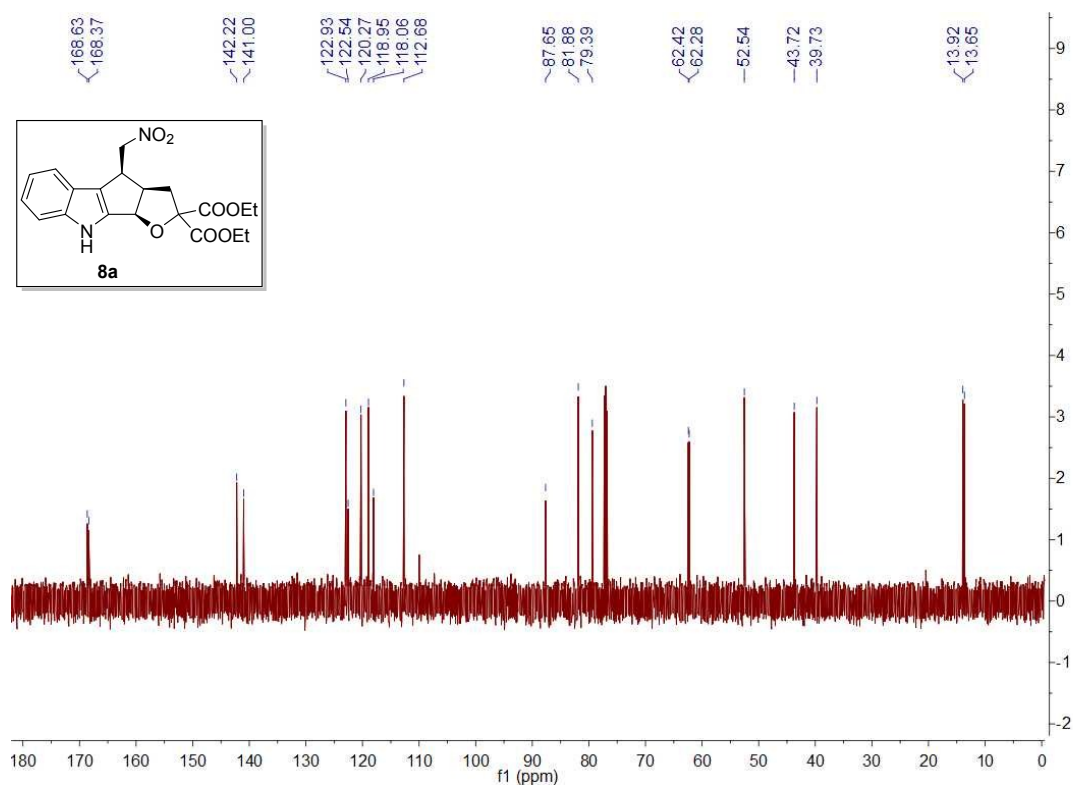

## The HPLC of racemic 8a

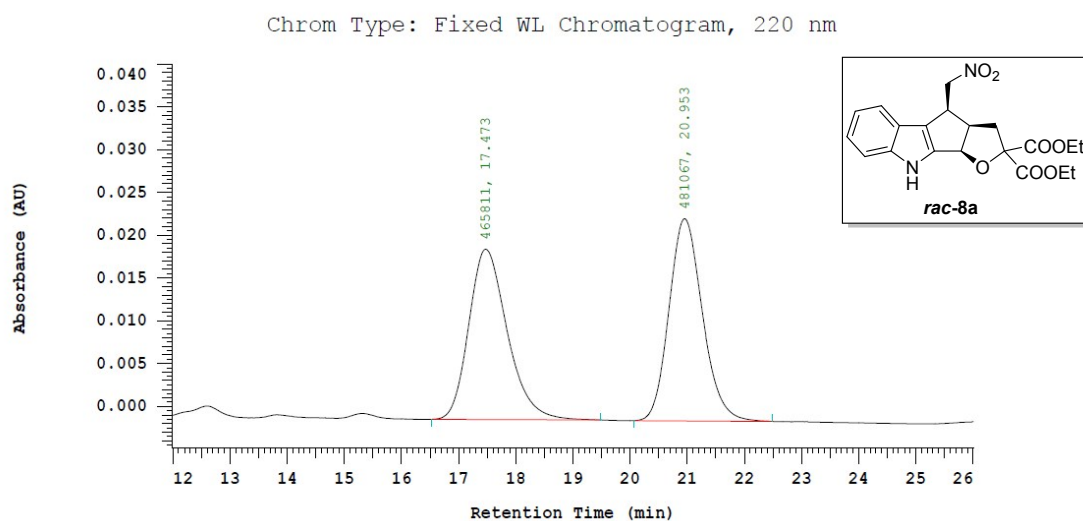

Chrom Type: Fixed WL Chromatogram, 220 nm  
 Peak Quantitation: AREA  
 Calculation Method: AREA%

| No. | RT     | Area   | Area %  | BC |
|-----|--------|--------|---------|----|
| 1   | 17.473 | 465811 | 49.194  | BB |
| 2   | 20.953 | 481067 | 50.806  | BB |
|     |        | 946878 | 100.000 |    |

## The HPLC of chiral 8a

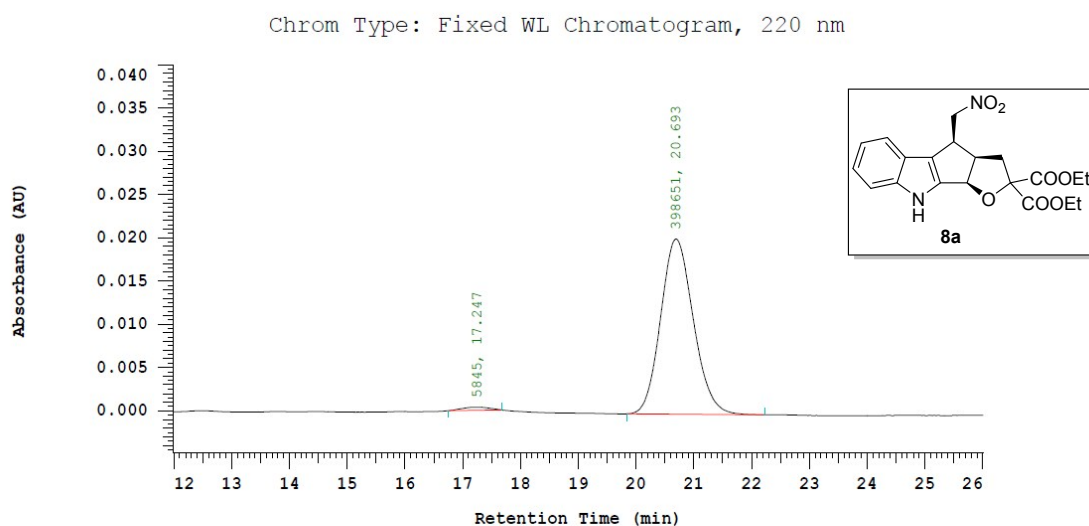

Chrom Type: Fixed WL Chromatogram, 220 nm  
 Peak Quantitation: AREA  
 Calculation Method: AREA%

| No. | RT     | Area   | Area %  | BC |
|-----|--------|--------|---------|----|
| 1   | 17.247 | 5845   | 1.445   | BB |
| 2   | 20.693 | 398651 | 98.555  | BB |
|     |        | 404496 | 100.000 |    |

The  $^1\text{H}$  NMR spectrum of **8b** (500 MHz,  $\text{CDCl}_3$ )

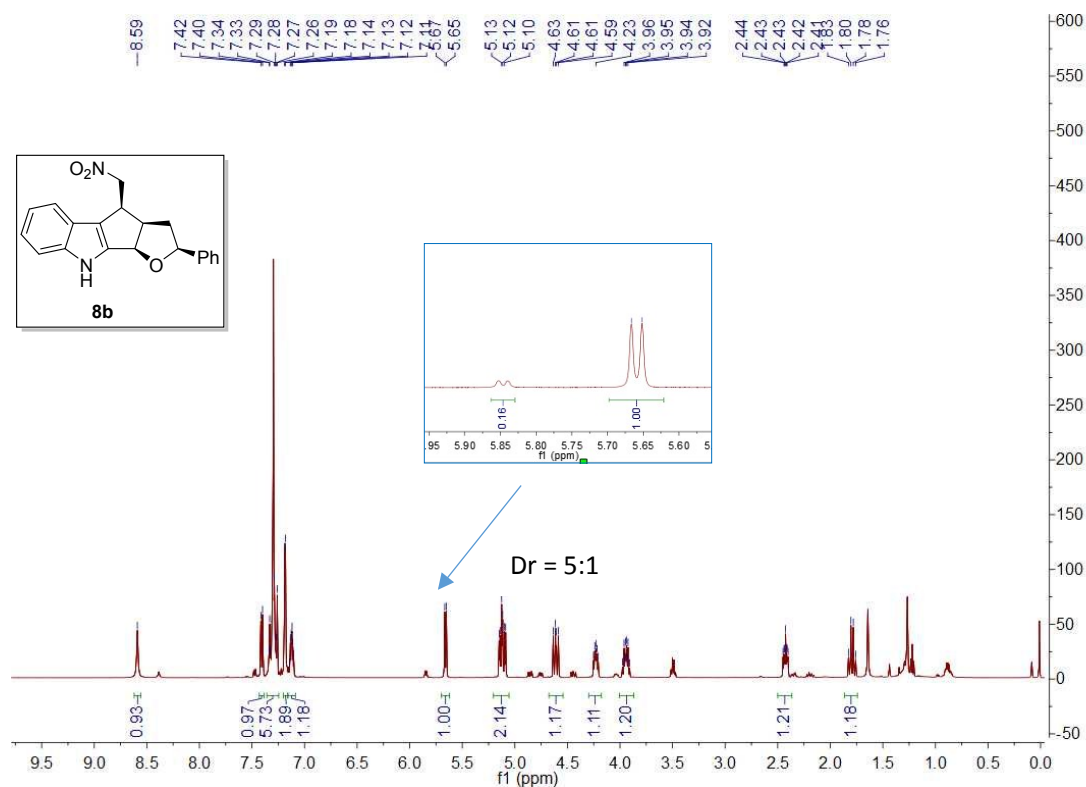

The  $^{13}\text{C}$  NMR spectrum of **8b** (125 MHz,  $\text{CDCl}_3$ )

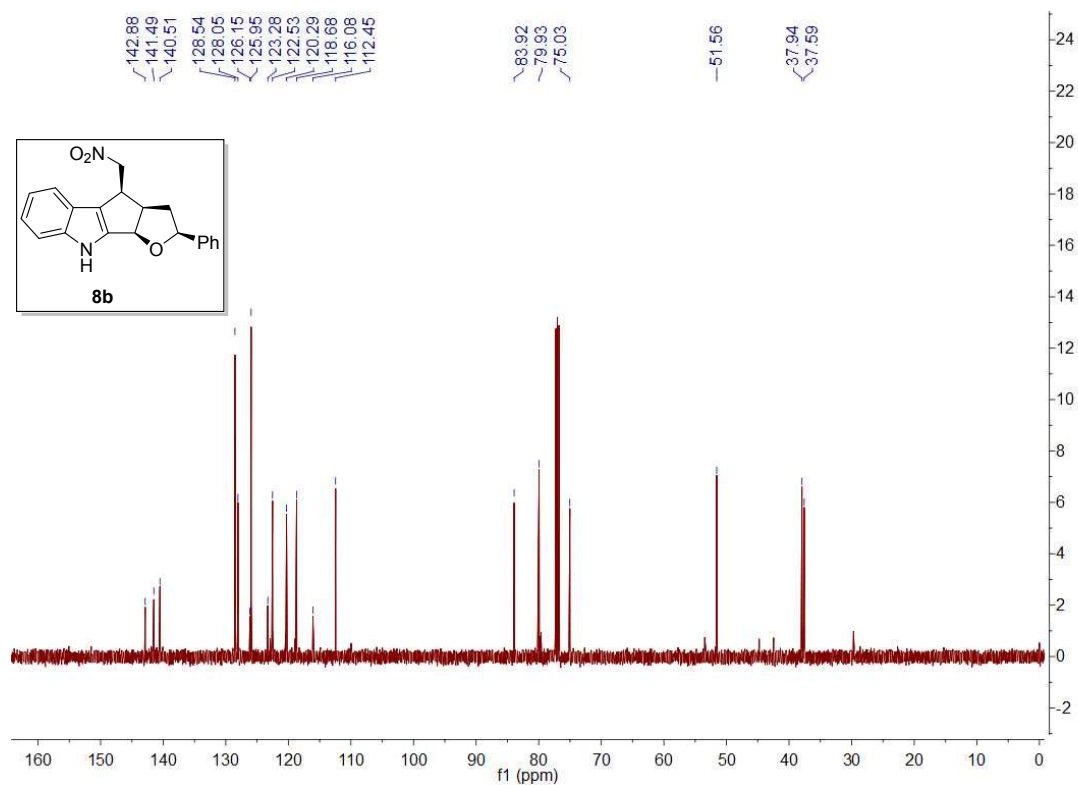

## The HPLC of racemic 8b

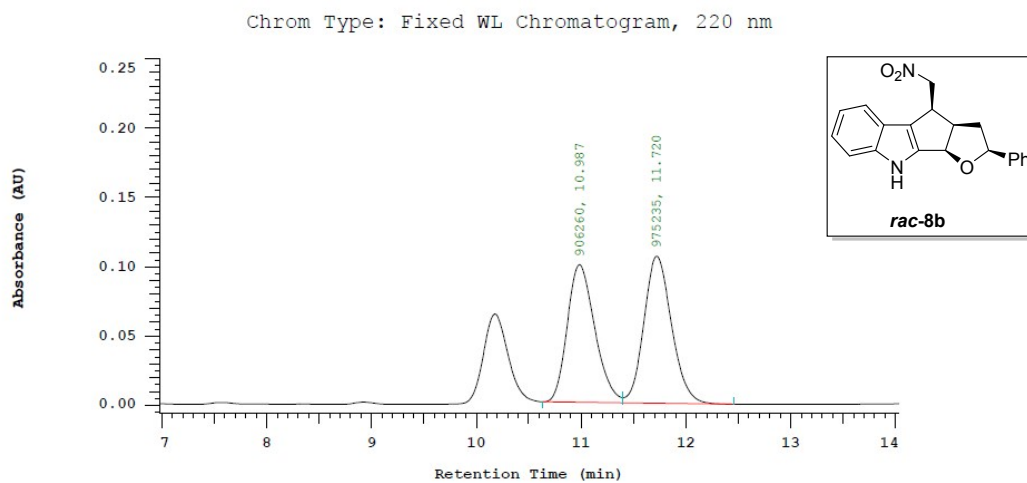

Chrom Type: Fixed WL Chromatogram, 220 nm  
 Peak Quantitation: AREA  
 Calculation Method: AREA%

| No. | RT     | Area    | Area %  | BC |
|-----|--------|---------|---------|----|
| 1   | 10.987 | 906260  | 48.167  | BV |
| 2   | 11.720 | 975235  | 51.833  | VB |
|     |        | 1881495 | 100.000 |    |

## The HPLC of chiral 8b

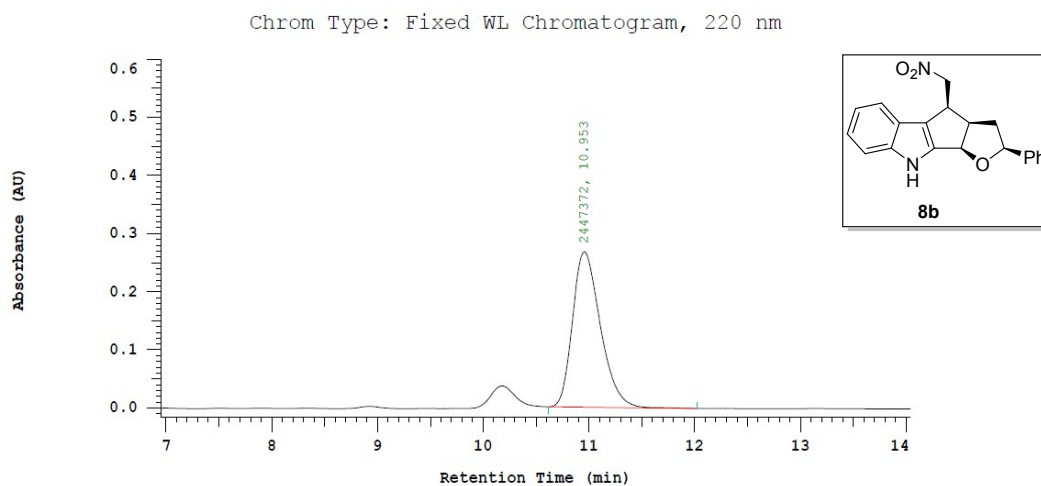

Chrom Type: Fixed WL Chromatogram, 220 nm  
 Peak Quantitation: AREA  
 Calculation Method: AREA%

| No. | RT     | Area    | Area %  | BC |
|-----|--------|---------|---------|----|
| 1   | 10.953 | 2447372 | 100.000 | BB |
|     |        | 2447372 | 100.000 |    |

The  $^1\text{H}$  NMR spectrum of **9a** (500 MHz,  $\text{CDCl}_3$ )

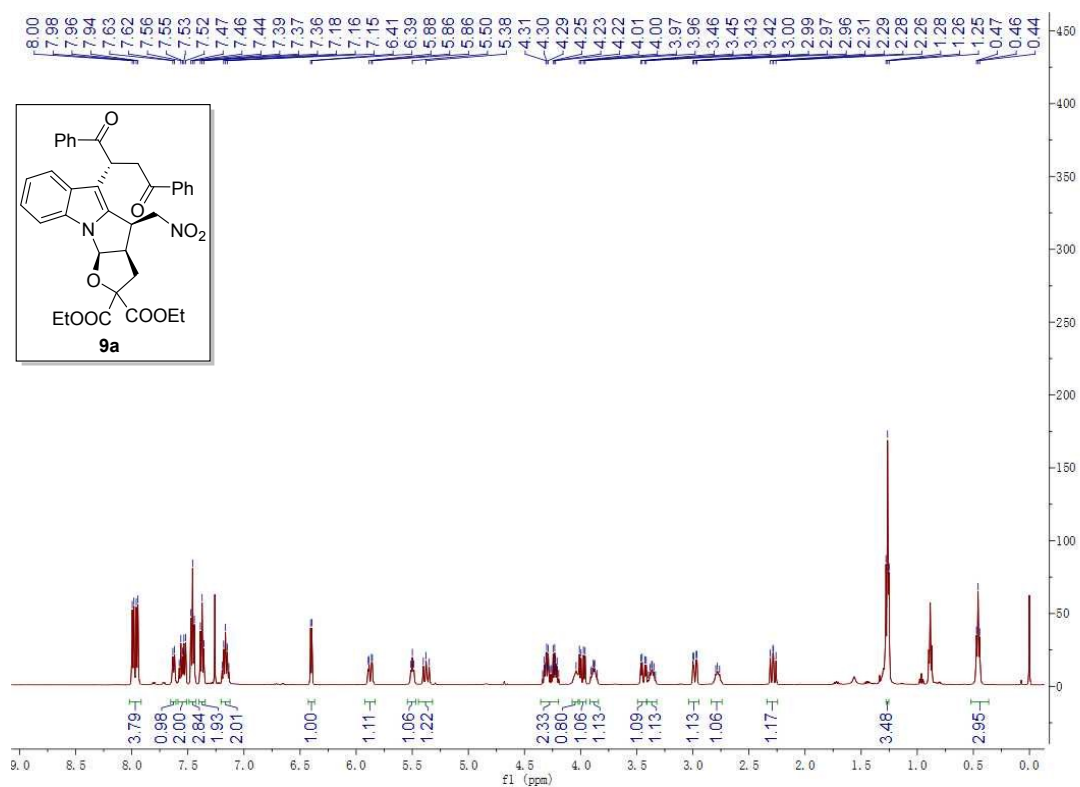

The  $^{13}\text{C}$  NMR spectrum of **9a** (125 MHz,  $\text{CDCl}_3$ )

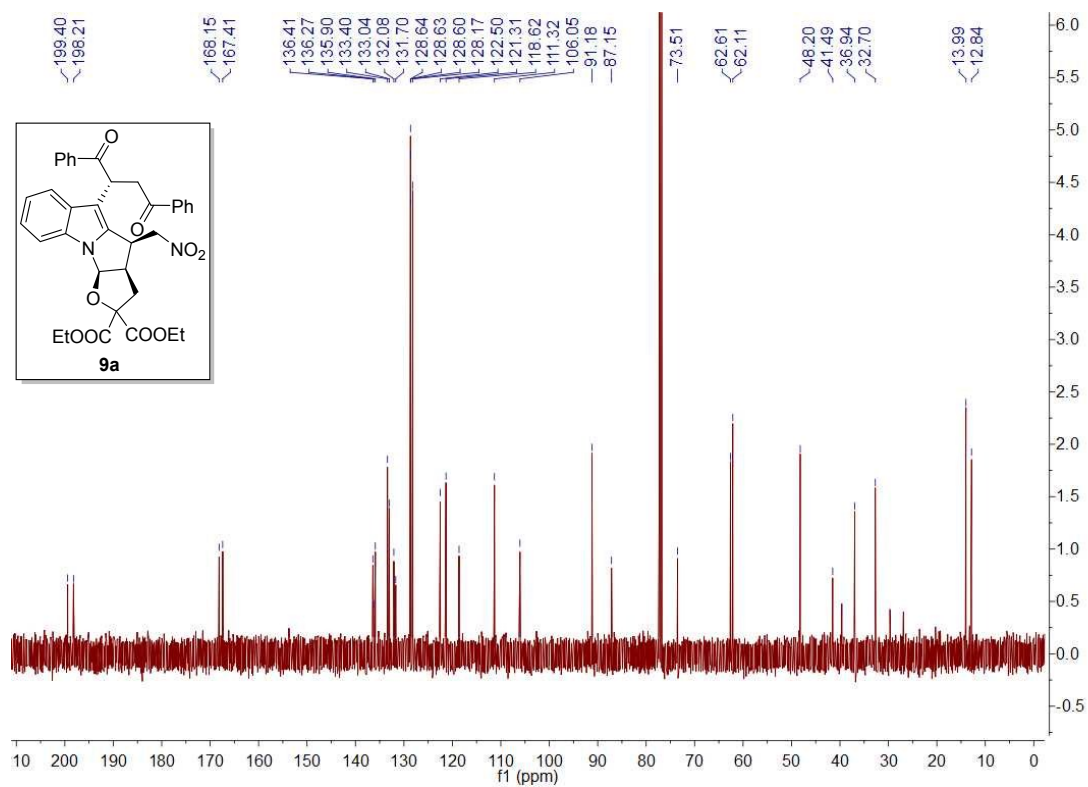



## The HPLC of racemic 9a

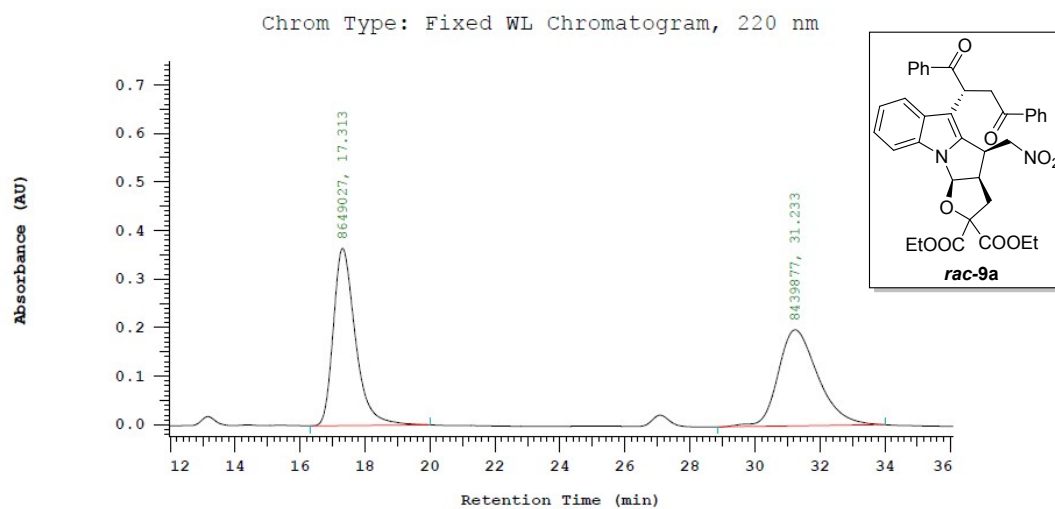

Chrom Type: Fixed WL Chromatogram, 220 nm  
 Peak Quantitation: AREA  
 Calculation Method: AREA%

| No. | RT     | Area     | Area %  | BC |
|-----|--------|----------|---------|----|
| 1   | 17.313 | 8649027  | 50.612  | BB |
| 2   | 31.233 | 8439877  | 49.388  | BB |
|     |        | 17088904 | 100.000 |    |

## The HPLC of chiral 9a

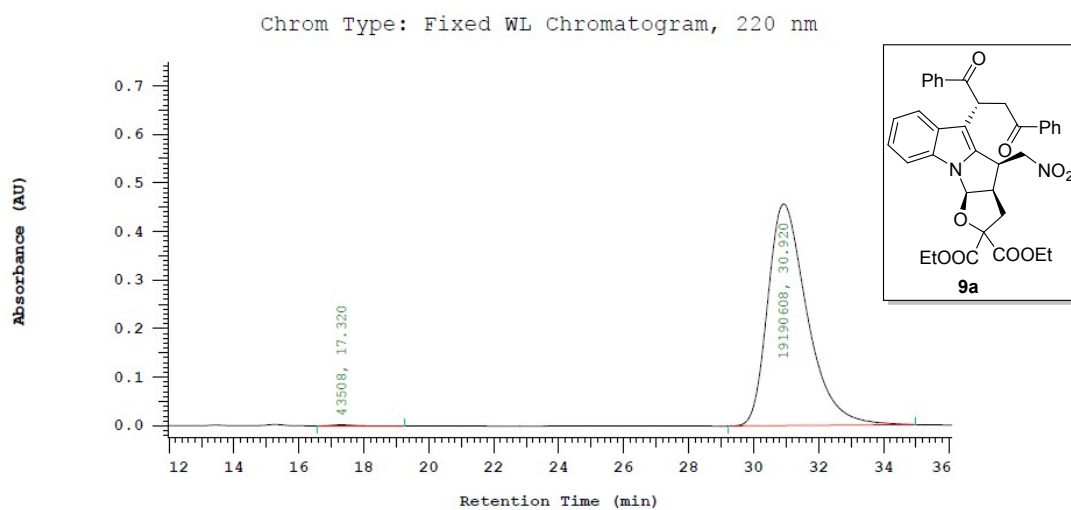

Chrom Type: Fixed WL Chromatogram, 220 nm  
 Peak Quantitation: AREA  
 Calculation Method: AREA%

| No. | RT     | Area     | Area %  | BC |
|-----|--------|----------|---------|----|
| 1   | 17.320 | 43508    | 0.226   | BB |
| 2   | 30.920 | 19190608 | 99.774  | BB |
|     |        | 19234116 | 100.000 |    |



### The <sup>1</sup>H NMR spectrum of 9b (500 MHz, CDCl<sub>3</sub>)

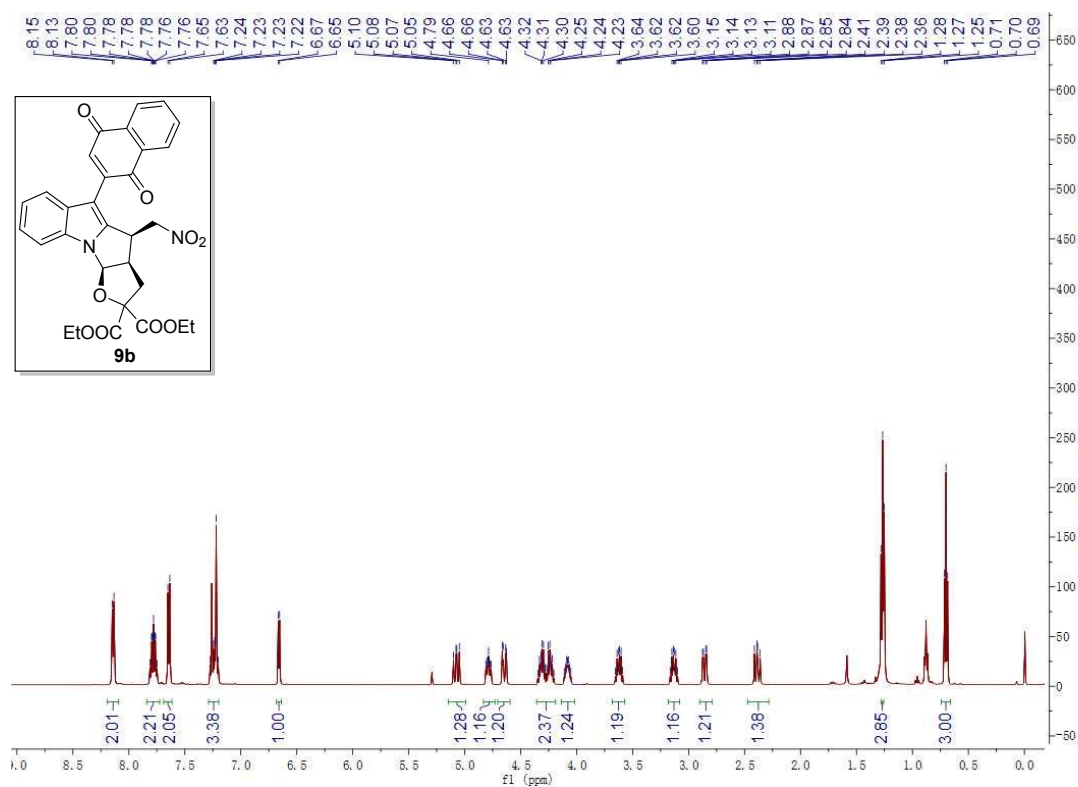

### The <sup>13</sup>C NMR spectrum of 9b (125 MHz, CDCl<sub>3</sub>)

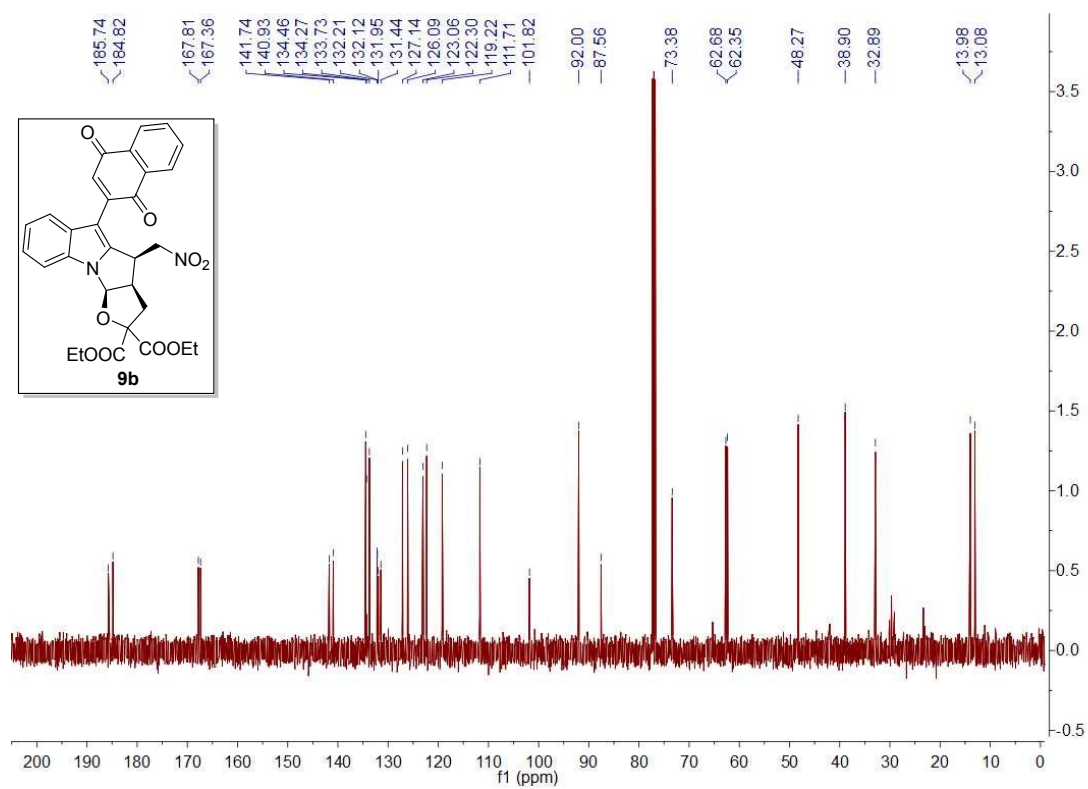

### The <sup>1</sup>H NMR spectrum of 9c (500 MHz, CDCl<sub>3</sub>)

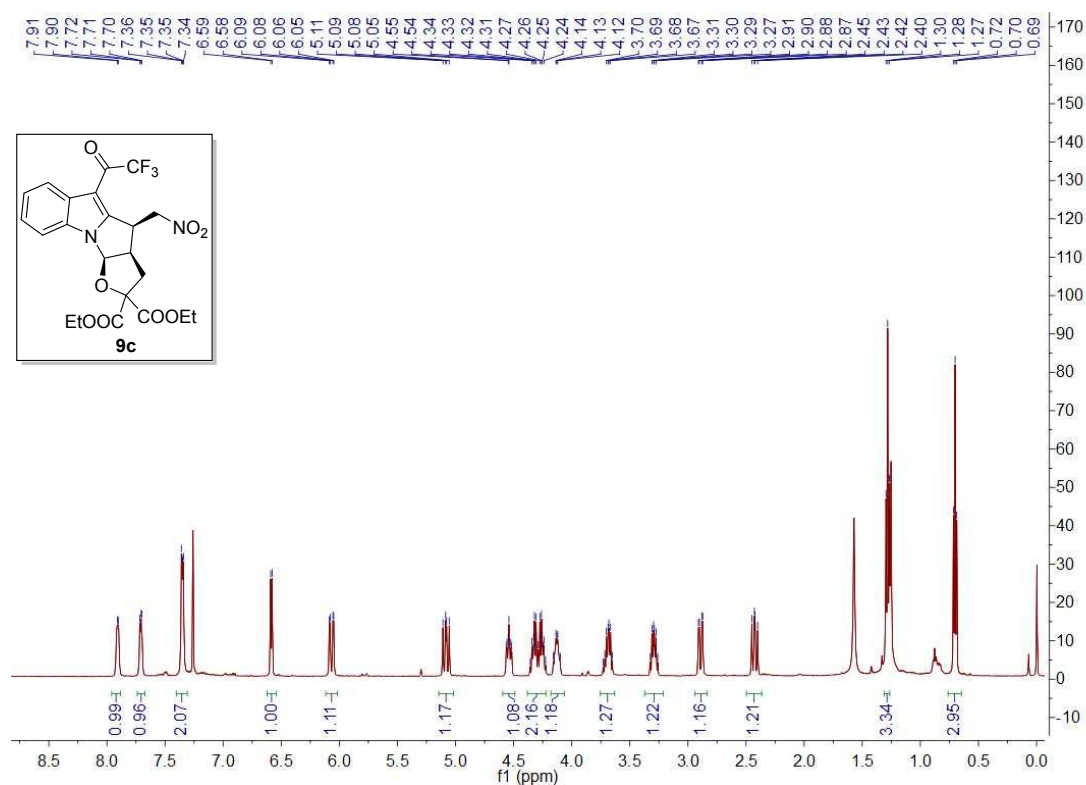

### The <sup>13</sup>C NMR spectrum of 9c (125 MHz, CDCl<sub>3</sub>)

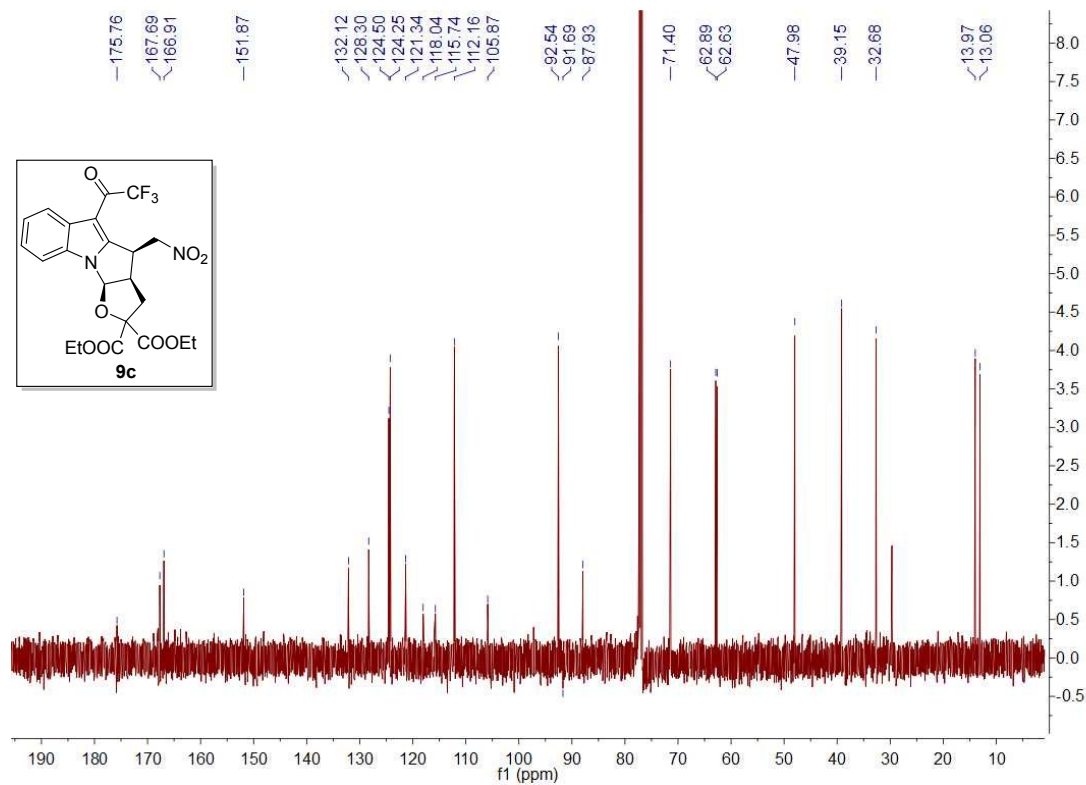

The <sup>1</sup>H NMR spectrum of 9d (500 MHz, CDCl<sub>3</sub>)

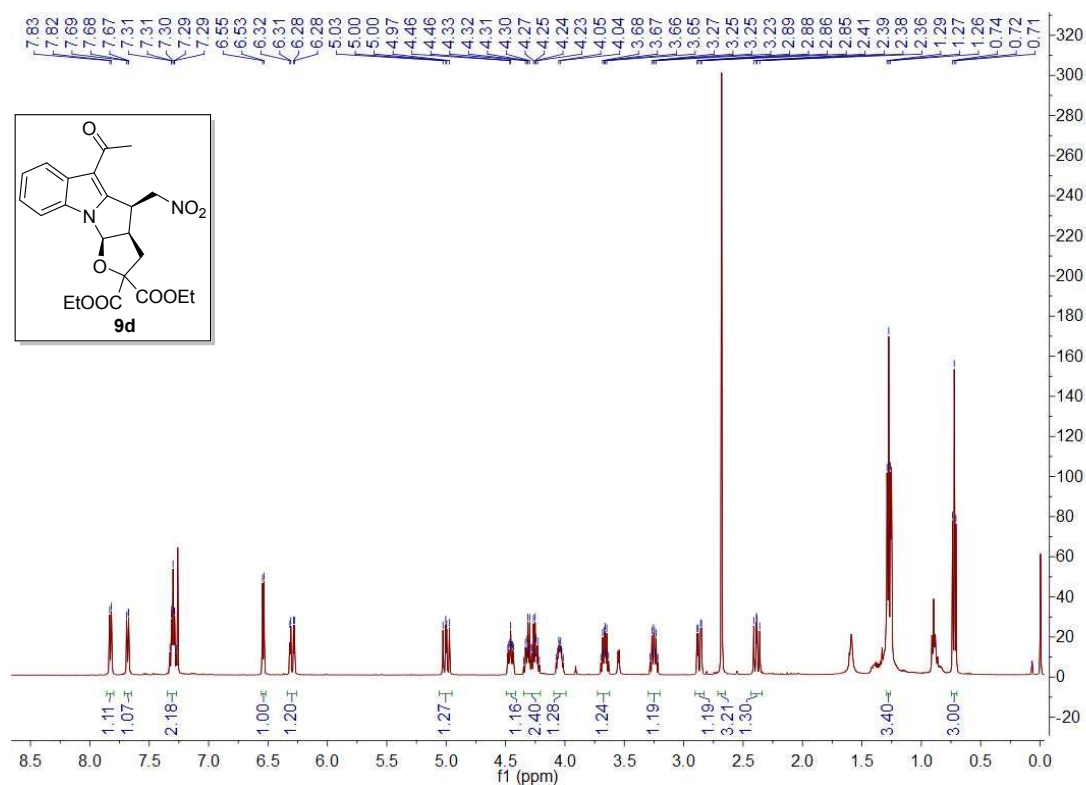

The <sup>13</sup>C NMR spectrum of 9d (125 MHz, CDCl<sub>3</sub>)

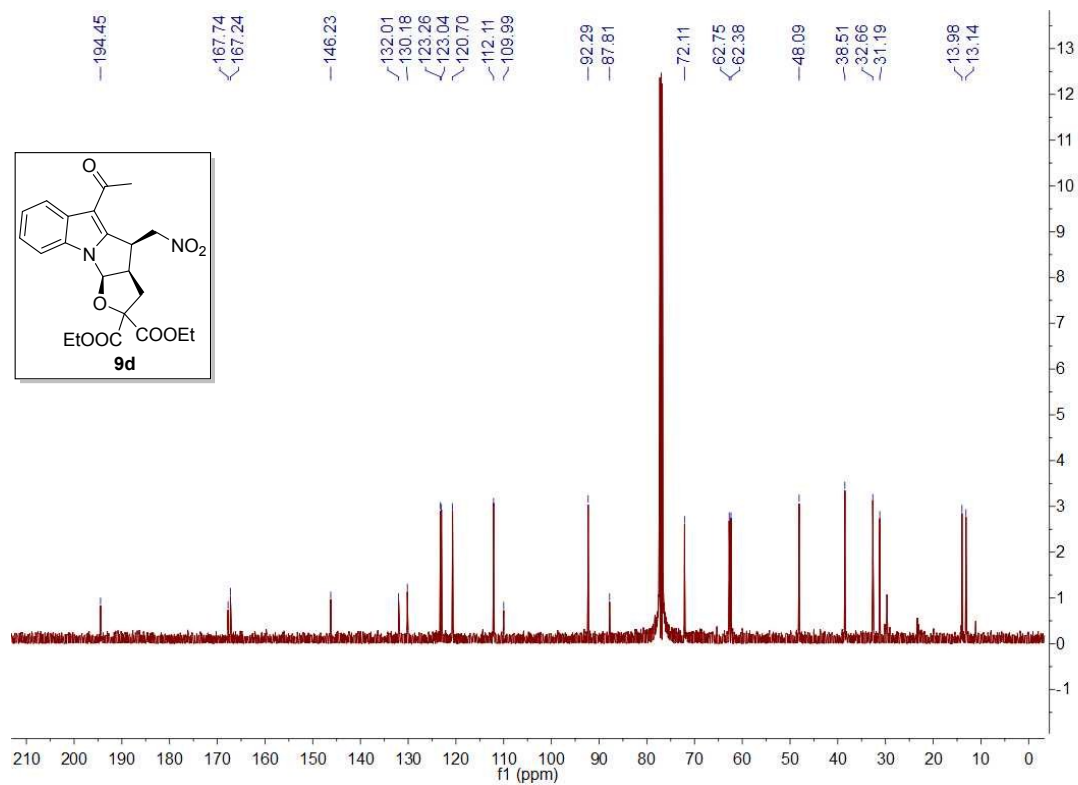

The <sup>1</sup>H NMR spectrum of 15a (500 MHz, CDCl<sub>3</sub>)

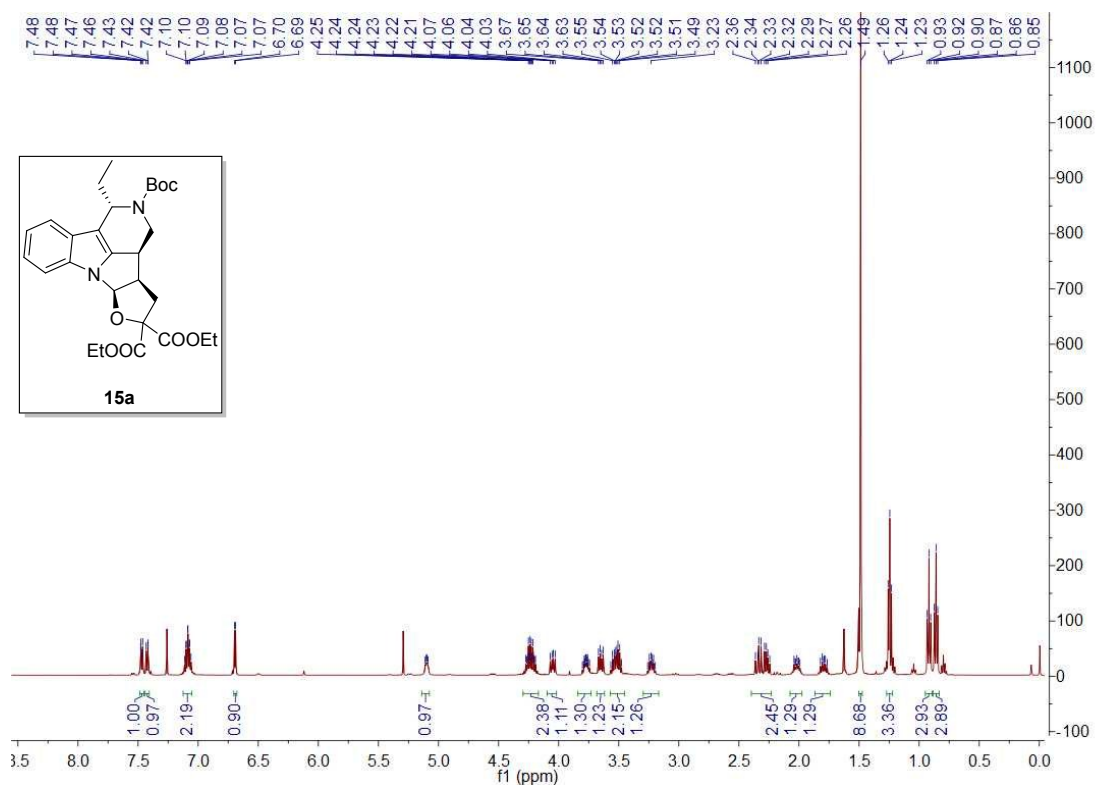

The <sup>13</sup>C NMR spectrum of 15a (125 MHz, CDCl<sub>3</sub>)

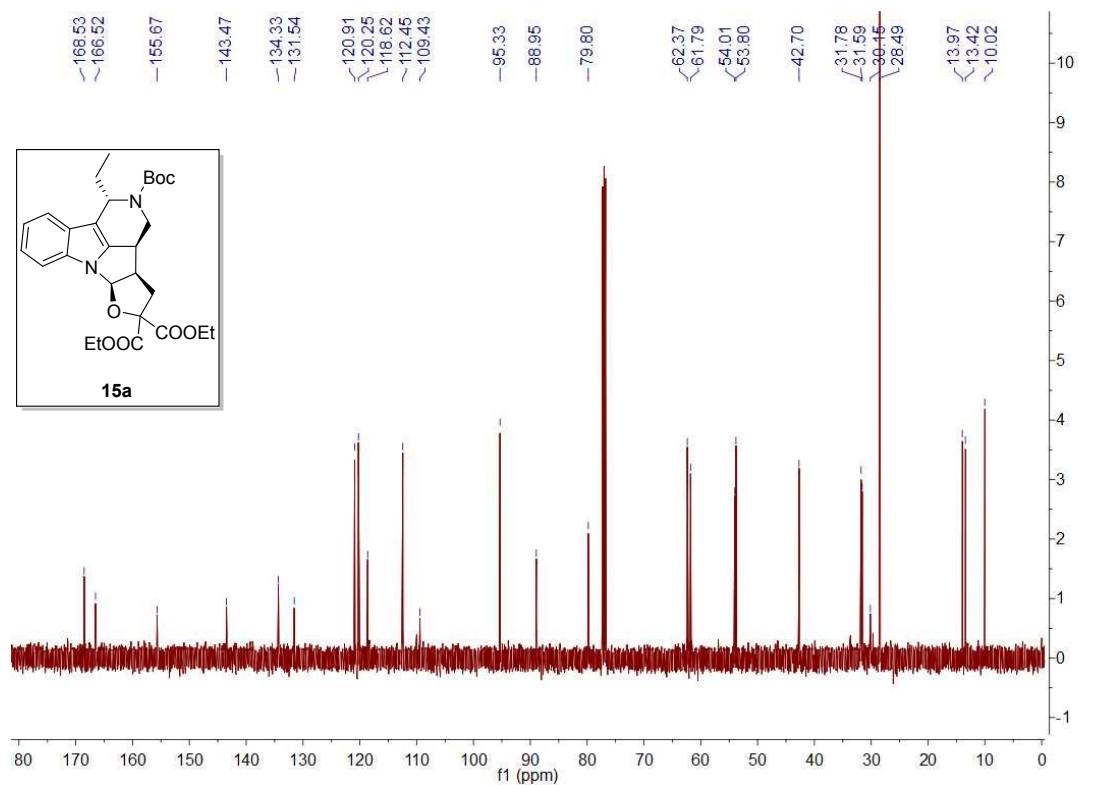

### The <sup>1</sup>H NMR spectrum of 15b (500 MHz, CDCl<sub>3</sub>)

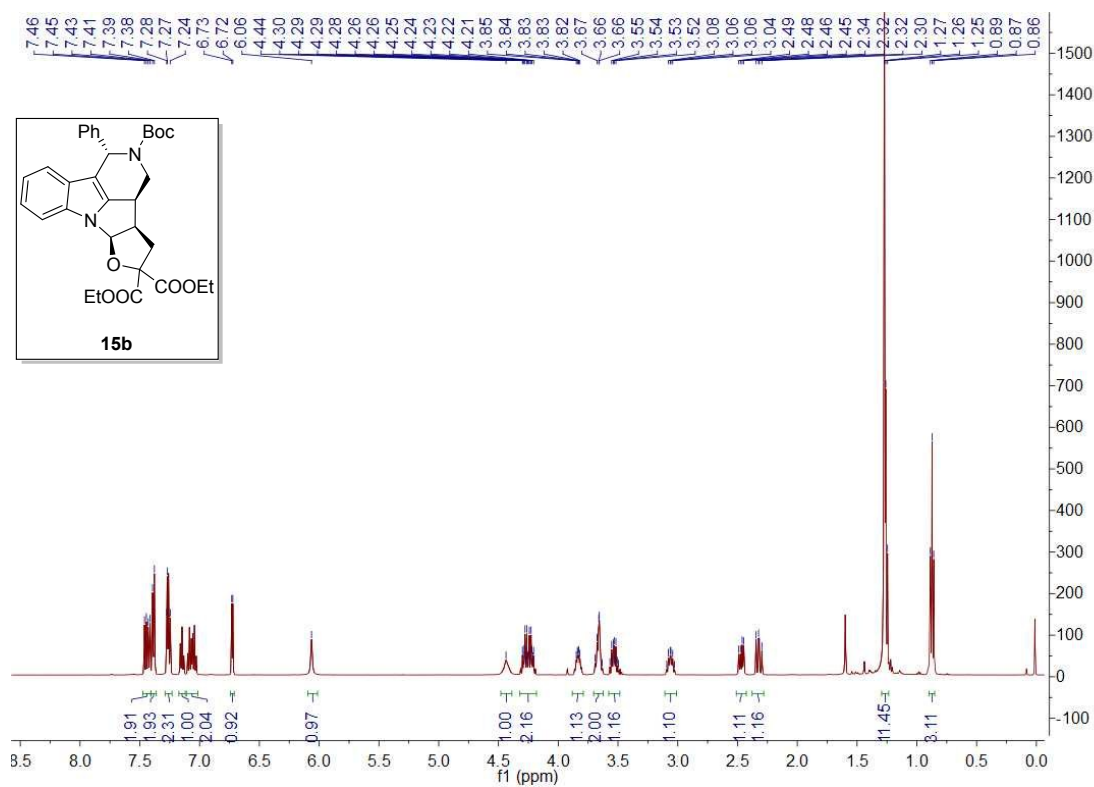

### The <sup>13</sup>C NMR spectrum of 15b (125 MHz, CDCl<sub>3</sub>)

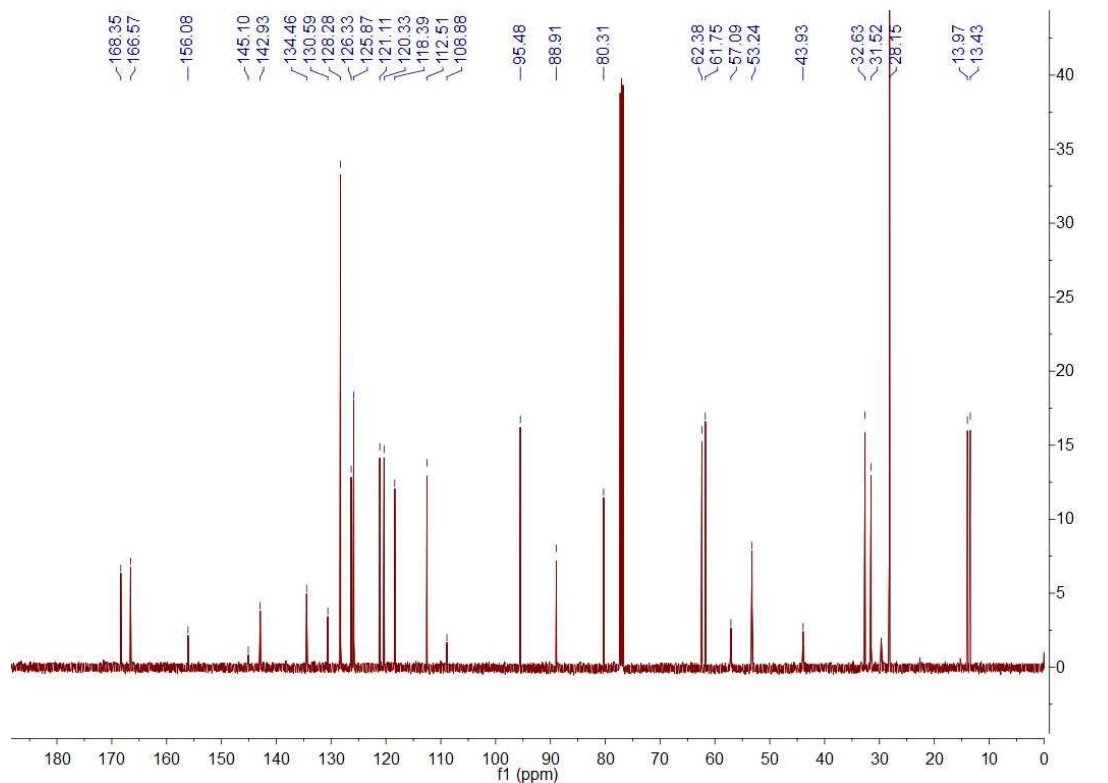

The  $^1\text{H}$  NMR spectrum of **15c** (500 MHz,  $\text{CDCl}_3$ )

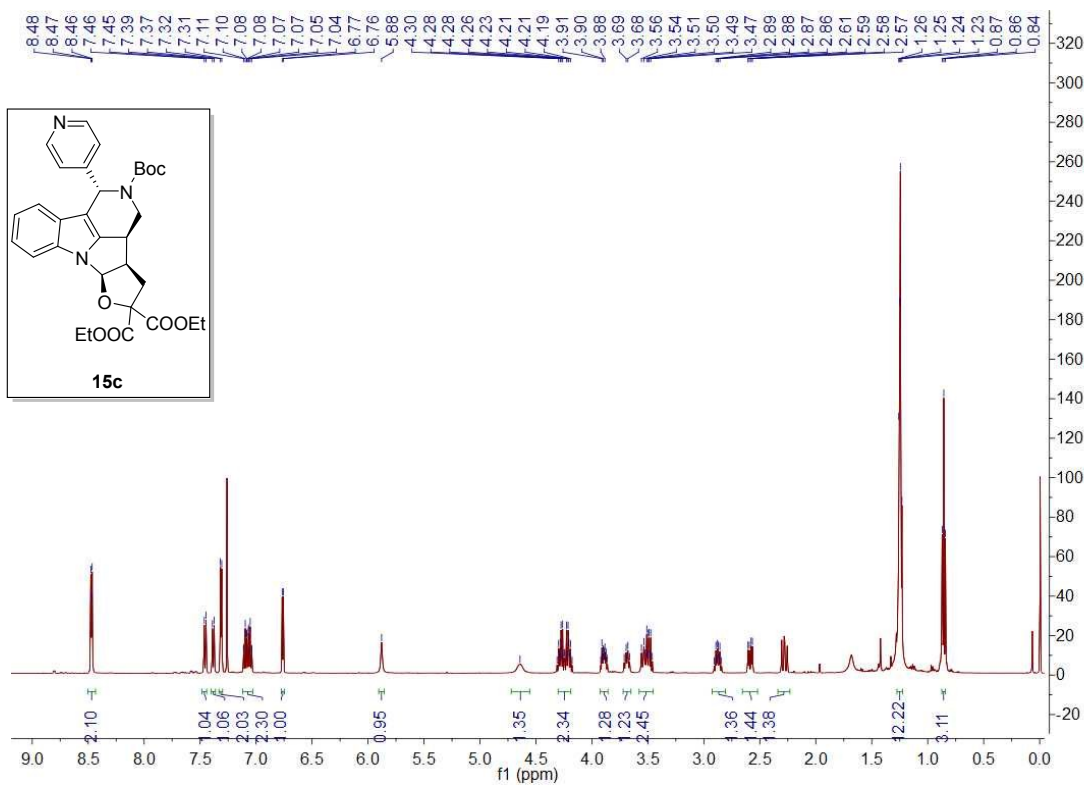

The  $^{13}\text{C}$  NMR spectrum of **15c** (125 MHz,  $\text{CDCl}_3$ )

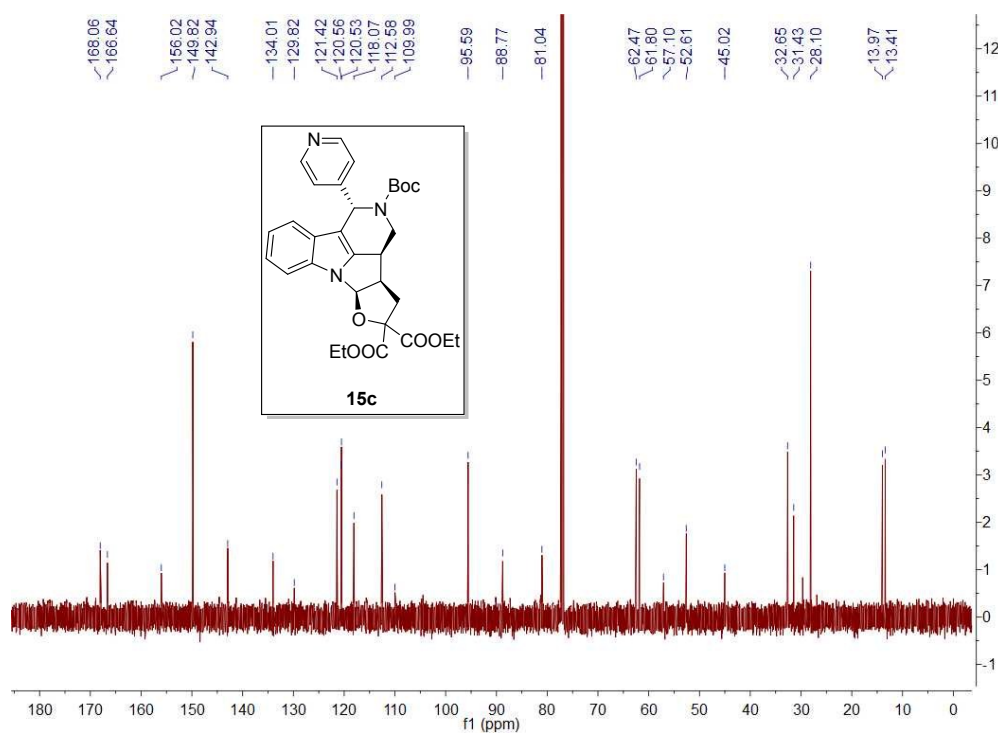



The <sup>1</sup>H NMR spectrum of 17 (500 MHz, CDCl<sub>3</sub>)

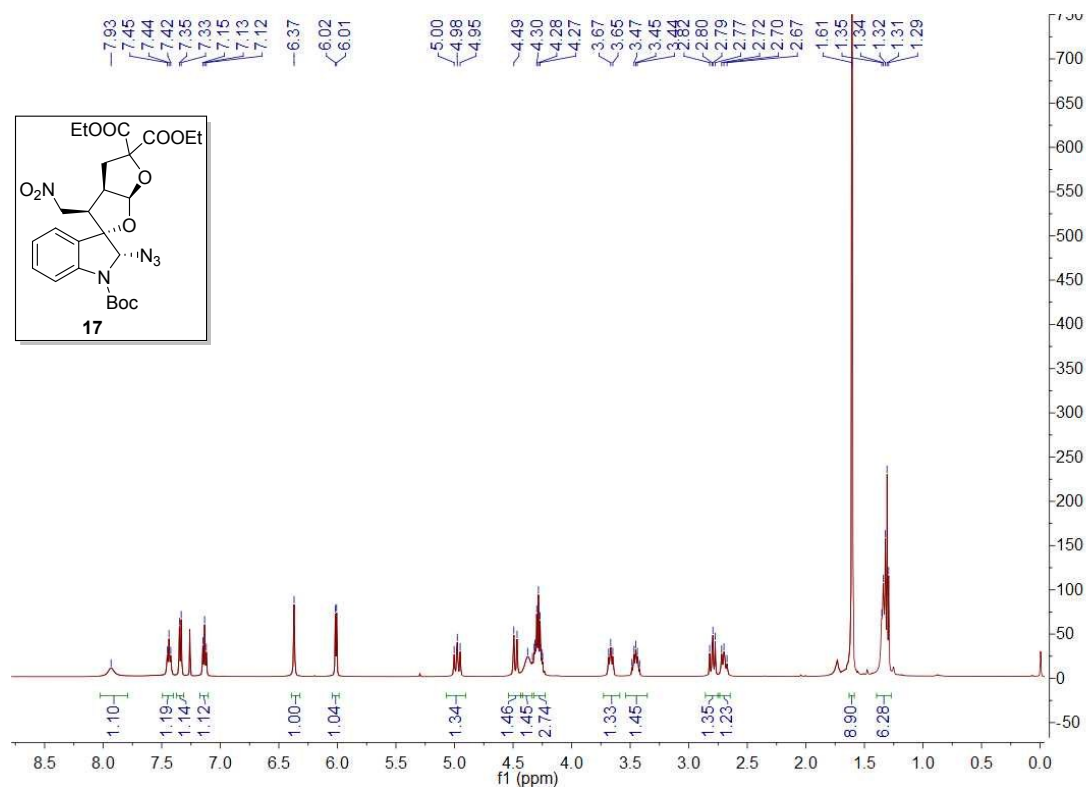

The <sup>13</sup>C NMR spectrum of 17 (125 MHz, CDCl<sub>3</sub>)

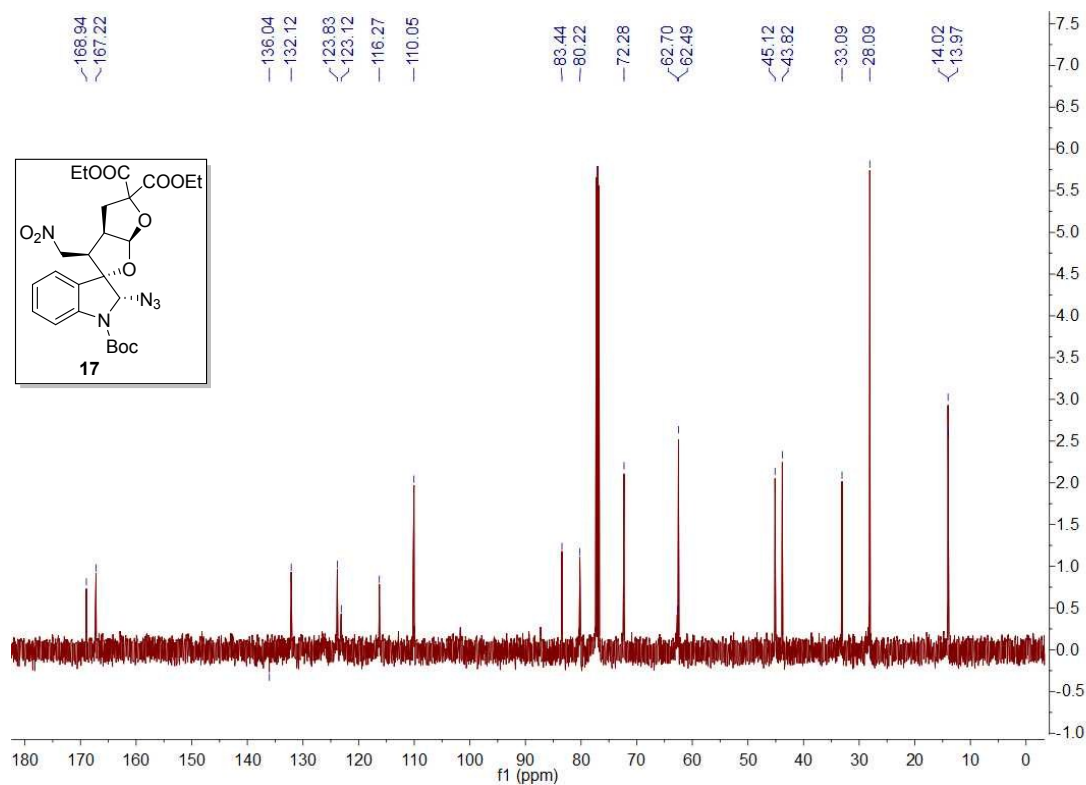

## The HPLC of racemic 17

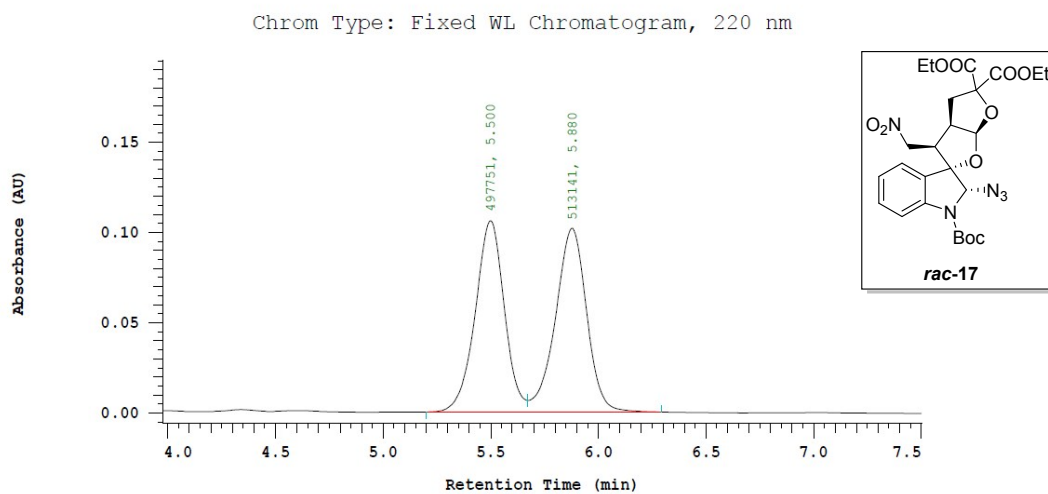

Chrom Type: Fixed WL Chromatogram, 220 nm  
 Peak Quantitation: AREA  
 Calculation Method: AREA%

| No. | RT    | Area    | Area %  | BC |
|-----|-------|---------|---------|----|
| 1   | 5.500 | 497751  | 49.239  | BV |
| 2   | 5.880 | 513141  | 50.761  | VB |
|     |       | 1010892 | 100.000 |    |

## The HPLC of chiral 17

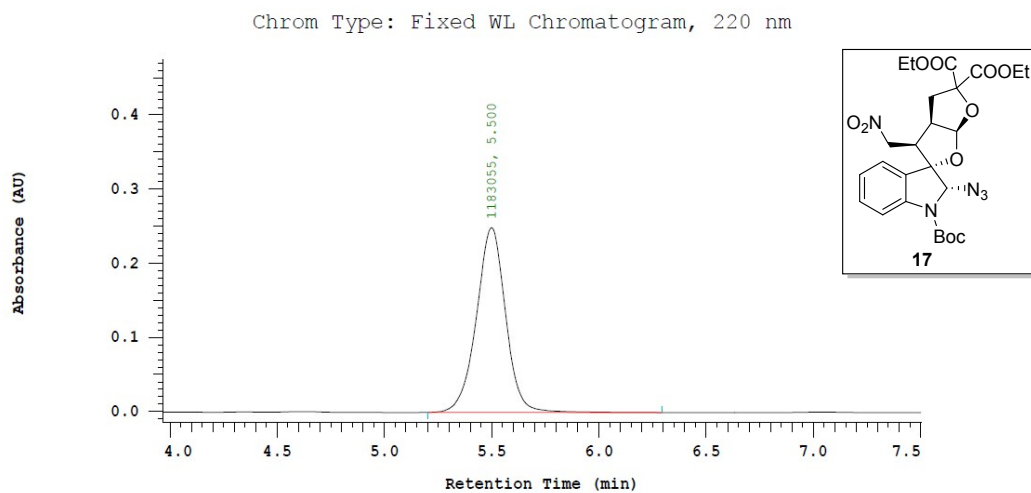

Chrom Type: Fixed WL Chromatogram, 220 nm  
 Peak Quantitation: AREA  
 Calculation Method: AREA%

| No. | RT    | Area    | Area %  | BC |
|-----|-------|---------|---------|----|
| 1   | 5.500 | 1183055 | 100.000 | BB |
|     |       | 1183055 | 100.000 |    |



## G. Single crystal X-Ray diffraction data

[CCDC 1877710-1877711 contain the supplementary crystallographic data for this paper. These data can be obtained free of charge from The Cambridge Crystallographic Data Centre via [www.ccdc.cam.ac.uk/data\\_request/cif](http://www.ccdc.cam.ac.uk/data_request/cif).]

### Absolute configuration of **5n** - CCDC 1877710

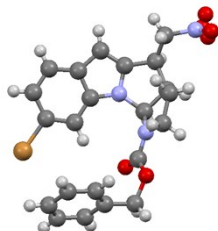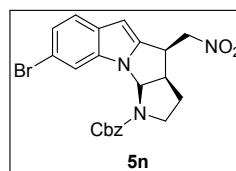

---

|                        |                                            |                                   |                          |
|------------------------|--------------------------------------------|-----------------------------------|--------------------------|
| Bond precision:        | C-C = 0.0060 Å                             | Wavelength=0.71073                |                          |
| Cell:                  | a=9.2282 (14)<br>alpha=90                  | b=9.1743 (14)<br>beta=109.724 (3) | c=12.829 (2)<br>gamma=90 |
| Temperature:           | 120 K                                      |                                   |                          |
|                        | Calculated                                 | Reported                          |                          |
| Volume                 | 1022.4 (3)                                 | 1022.4 (3)                        |                          |
| Space group            | P 21                                       | P 1 21 1                          |                          |
| Hall group             | P 2yb                                      | P 2yb                             |                          |
| Moiety formula         | C22 H20 Br N3 O4                           | C22 H20 Br N3 O4                  |                          |
| Sum formula            | C22 H20 Br N3 O4                           | C22 H20 Br N3 O4                  |                          |
| Mr                     | 470.31                                     | 470.31                            |                          |
| Dx, g cm <sup>-3</sup> | 1.528                                      | 1.528                             |                          |
| Z                      | 2                                          | 2                                 |                          |
| Mu (mm <sup>-1</sup> ) | 2.045                                      | 2.045                             |                          |
| F000                   | 480.0                                      | 480.0                             |                          |
| F000'                  | 479.63                                     |                                   |                          |
| h, k, lmax             | 11, 11, 16                                 | 11, 11, 16                        |                          |
| Nref                   | 4674 [ 2483]                               | 4202                              |                          |
| Tmin, Tmax             |                                            | 0.570, 0.746                      |                          |
| Tmin'                  |                                            |                                   |                          |
| Correction method=     | # Reported T Limits: Tmin=0.570 Tmax=0.746 |                                   |                          |
| AbsCorr =              | MULTI-SCAN                                 |                                   |                          |
| Data completeness=     | 1.69/0.90                                  | Theta(max) = 27.485               |                          |
| R(reflections)=        | 0.0326 ( 3248)                             | wR2(reflections)= 0.0730 ( 4202)  |                          |
| S =                    | 0.839                                      | Npar= 289                         |                          |

---

# Absolute configuration of **6a** - 1877711

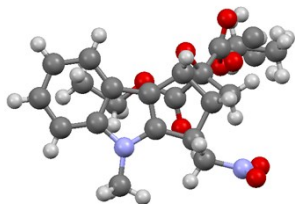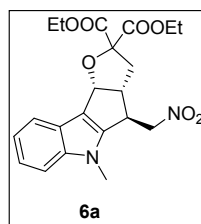

Bond precision: C-C = 0.0057 Å

Wavelength=0.71073

Cell: a=9.6264 (13) b=10.8580 (14) c=11.2163 (14)  
 alpha=90 beta=113.736 (2) gamma=90  
 Temperature: 120 K

|                        | Calculated    | Reported      |
|------------------------|---------------|---------------|
| Volume                 | 1073.2 (2)    | 1073.2 (2)    |
| Space group            | P 21          | P 1 21 1      |
| Hall group             | P 2yb         | P 2yb         |
| Moiety formula         | C21 H24 N2 O7 | C21 H24 N2 O7 |
| Sum formula            | C21 H24 N2 O7 | C21 H24 N2 O7 |
| Mr                     | 416.42        | 416.42        |
| Dx, g cm <sup>-3</sup> | 1.289         | 1.289         |
| Z                      | 2             | 2             |
| Mu (mm <sup>-1</sup> ) | 0.097         | 0.097         |
| F000                   | 440.0         | 440.0         |
| F000'                  | 440.25        |               |
| h, k, lmax             | 12, 14, 14    | 12, 14, 14    |
| Nref                   | 4985 [ 2624]  | 4646          |
| Tmin, Tmax             |               | 0.681, 0.746  |
| Tmin'                  |               |               |

Correction method= # Reported T Limits: Tmin=0.681 Tmax=0.746  
 AbsCorr = MULTI-SCAN

Data completeness= 1.77/0.93 Theta(max)= 27.607

R(reflections)= 0.0496 ( 3074) wR2(reflections)= 0.1161 ( 4646)

S = 1.057

Npar= 304

## H. Absolute configuration of 15b

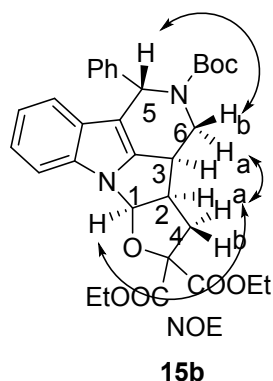

The NOE correlation of H-1/H-4a and the NOESY correlation of H-4a/H-6a indicated they are on the same side. The NOESY correlations of H-5/H-6b indicated that they are on the opposite side. The absolute configurations of C-1, C-2, C-3 were the same as **5n**. Thus, the absolute configurations of compound **5n** were determined as 1*R*, 2*R*, 3*R*, 5*S* respectively.

### The NOESY analysis of compound 15b

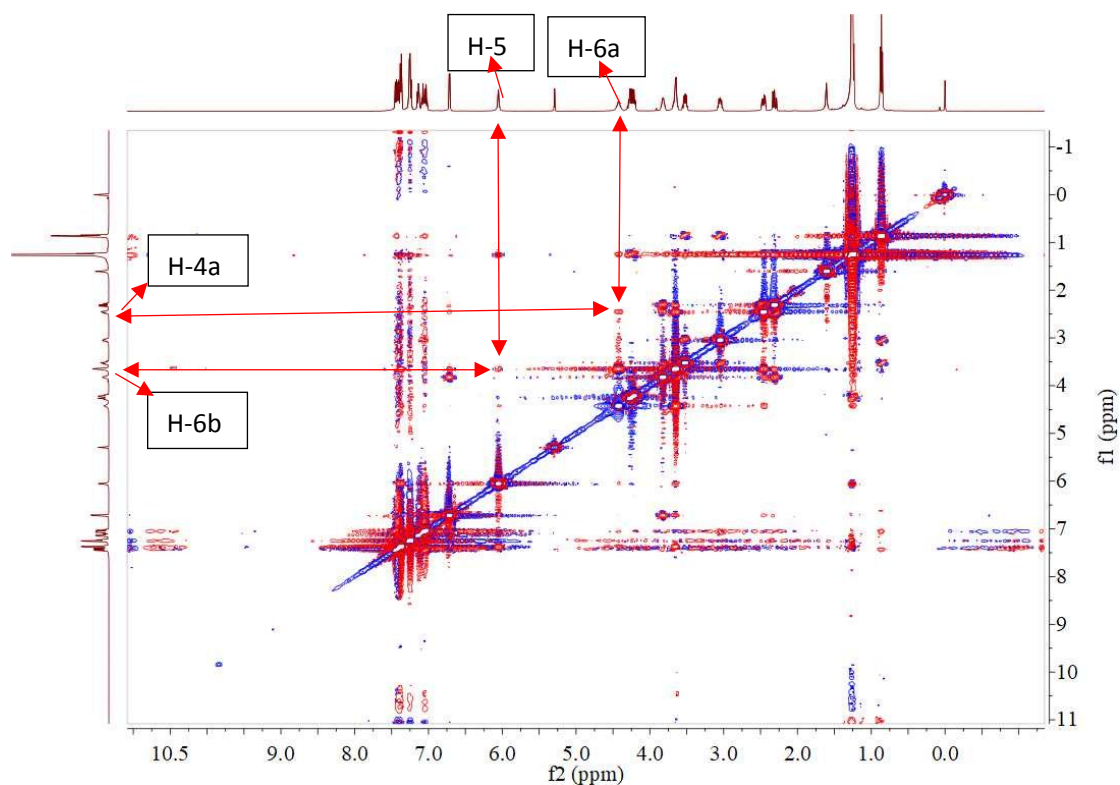

# The NOE analysis of compound 15b

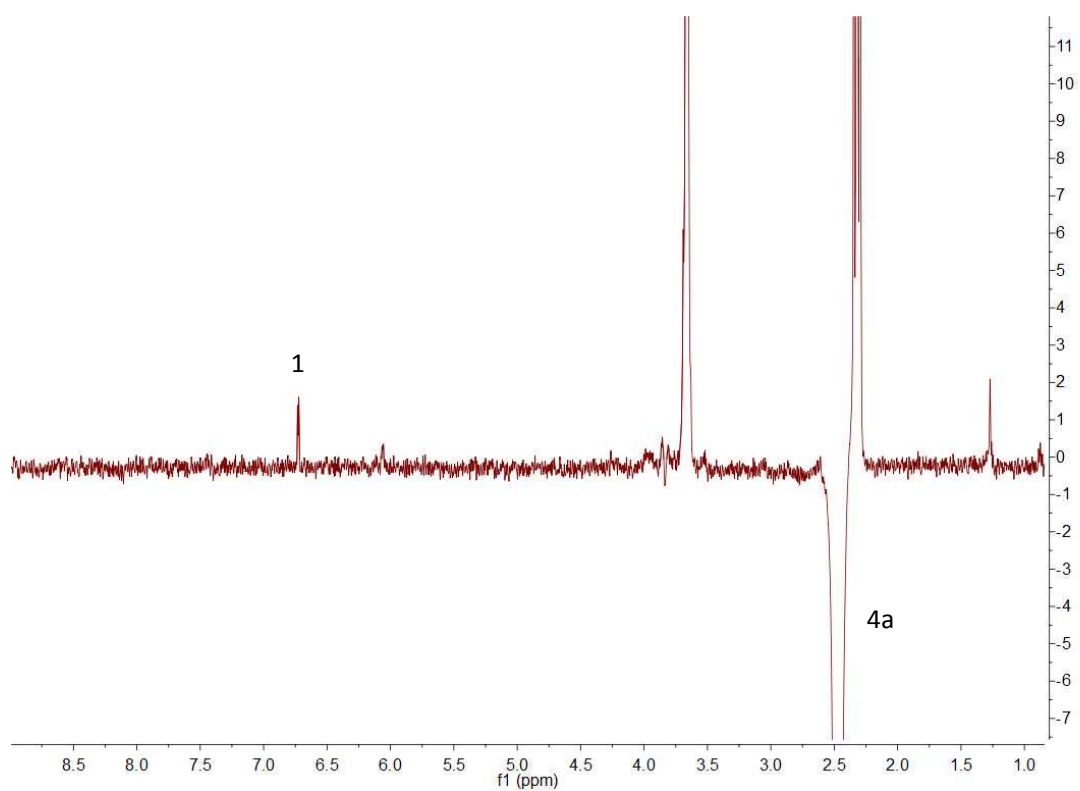

## The gCOSY analysis of compound **15b**

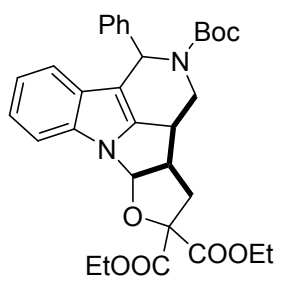

Key COSY correlations of **15b**

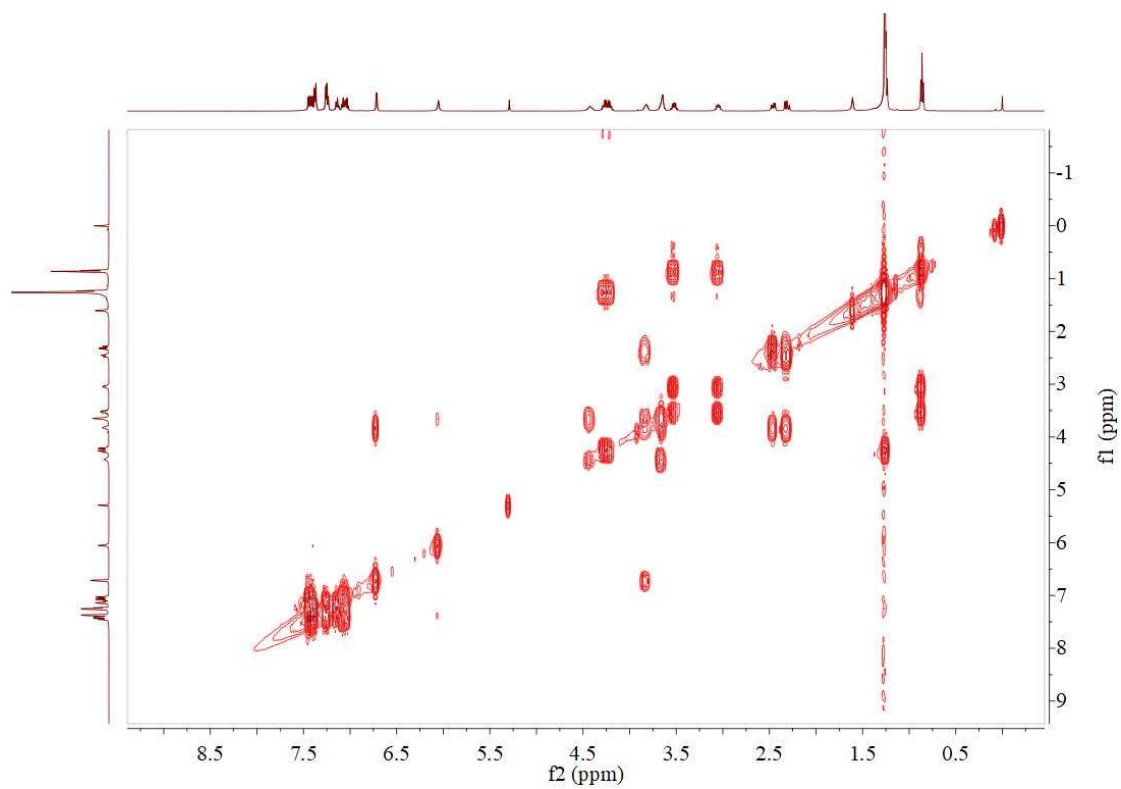

## I. Absolute configuration of 17

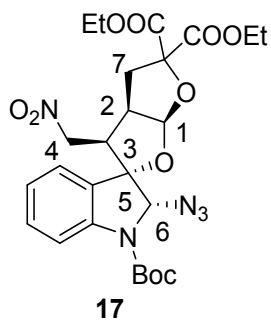

The large coupling constant (5.9 Hz) between H-1 and H-2 and NOESY correlation of H-1 and H-3 indicated that they are on the same side. While the NOESY correlations of H-6, H-4 and H-7 indicated that H-6 are on the other side. Thus, the relative configurations of compound 17 were determined as 1*R*, 2*R*, 3*R*, 5*S*, 6*S*. The absolute configuration of C-2 could be determined as R by the X-ray data of 5n. So the absolute configurations of compound 17 were determined as 1*R*, 2*R*, 3*R*, 5*S*, 6*S* respectively.

### The NOE analysis of compound 17

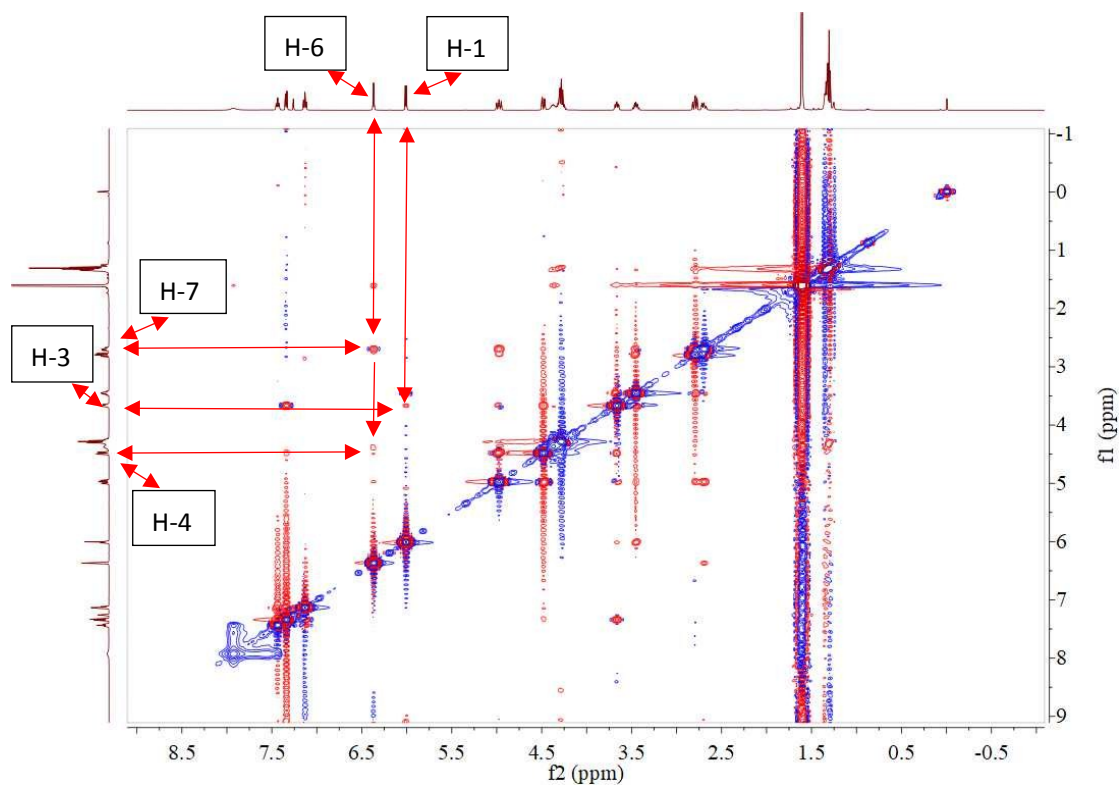

## The gCOSY analysis of compound 17

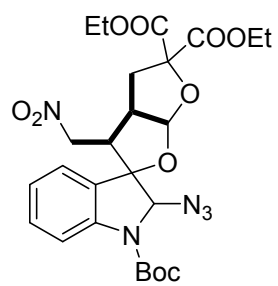

Key COSY correlations of 17

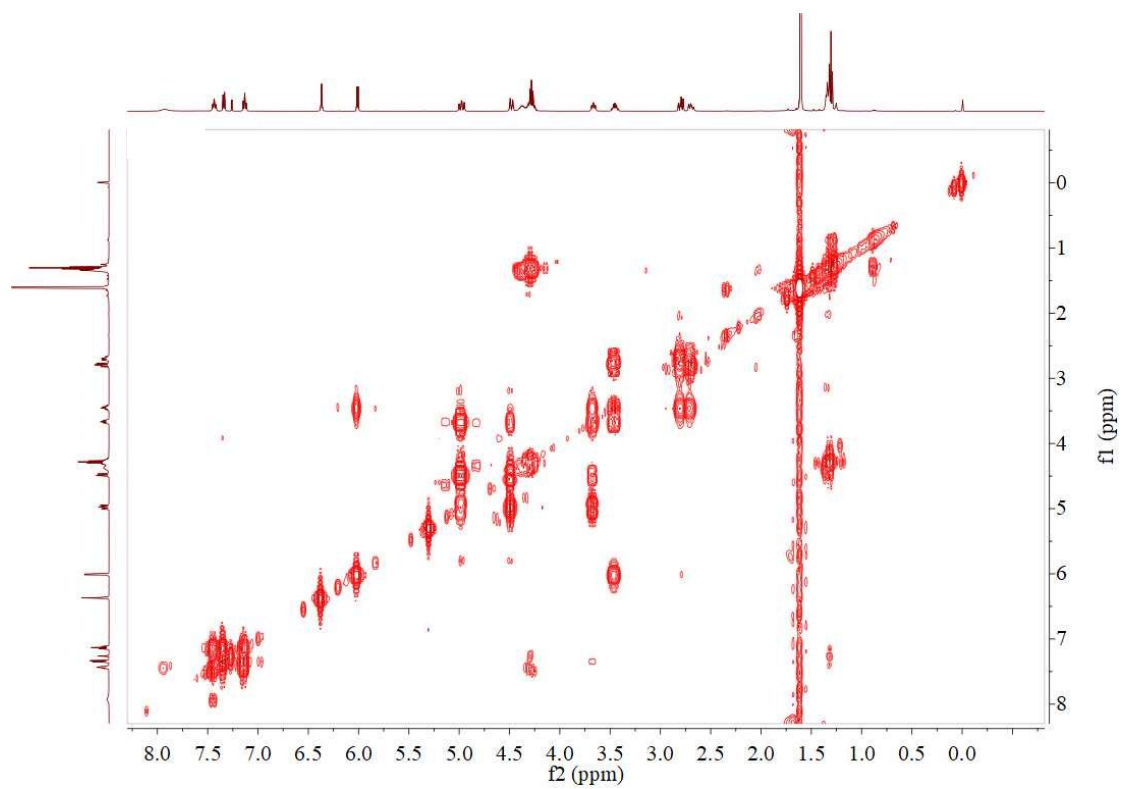

Supplement: c8qo01406j1.pdf [file c8qo01406j1.pdf]
